# Supplementary material for: Pathway analysis identifies altered mitochondrial metabolism, neurotransmission, structural pathways and complement cascade in retina/RPE/ choroid in chick model of form-deprivation myopia
Source: PeerJ. 2018 Jun 27;6:e5048. doi: 10.7717/peerj.5048 (PMC6026464; doi:10.7717/peerj.5048)
Supplement: File S1 — (A) Highly regulated biological pathways during normal eye development include 1 BioCarta, 17 KEGG and 43 Reactome pathways. (B) GSEA identified 1 BioCarta, 26 KEGG and 103 Reactome pathways highly regulated in response to 10 days (240 hr) of FD. (C) GSEA identified 1 Reactome pathway highy regulated in response to 24hr recovery post-occluder removal. The tables are adjustable and information can be manipulated by cluster. Average measures for each cluster are also calculated. ES, enrichment score; NES, normalised enrichment score; FDR, false discovery rate. [file peerj-06-5048-s001.xlsx]

## Sheet: a. Control
			Average
Cluster Name	Pathway Name	Core genes	Average of Pathway Size	Average of Number of core genes	Average of ES	Average of NES	Average of FDR q-value	Average of Tag %	Average of List %	Average of Signal strength %
Cell cycle, mitotic			138.4	75.8	-0.25765	-2.23272	0.0194445	0.528	0.314	0.314
Cytochrome P450			35	28.5	0.370064	2.24722	0.0249356	0.82	0.47	0.47
Cytokine pathways			80	58.5	0.431513	2.7173	0.0018362	0.81	0.4	0.4
Glucosaminoglycan Metabolism			44	29.75	0.363945	2.12075	0.0289386	0.7225	0.3975	0.3975
GPCR Signaling			227	140.714	0.256444	2.5719	0.0189229	0.658571	0.455714	0.518571
Neurotransmission			102.2	59.8	-0.339795	-2.52196	0.0107823	0.652	0.37	0.37
Not clustered: down-regulated			63.5833	41.3333	-0.38875	-2.37329	0.0150093	0.723333	0.376667	0.376667
Not clustered: Upregulated			40	27.3571	0.36951	2.22267	0.0140699	0.69	0.382143	0.382143
Peroxisome			41	27	-0.372306	-2.22065	0.0166203	0.72	0.395	0.395
Phospholipid Metabolism			103.5	47	-0.260011	-2.1344	0.0257911	0.49	0.28	0.28
Ubiquitin-mediated proteolysis			145.667	85.6667	-0.243074	-2.49082	0.00553362	0.59	0.39	0.39
Vesicle-mediated transport			35.3333	25	-0.370012	-2.15157	0.0251909	0.743333	0.4	0.4

## Sheet: b. FDMI
			Average
Cluster Name	Pathway Name	Core genes	Average of Pathway Size	Average of Number of core genes	Average of ES	Average of NES	Average of FDR q-value	Average of Tag %	Average of List %	Average of Signal strength %
Cell cycle, mitotic			52	32.3333	-0.321673	-2.25315	0.00918052	0.623333	0.36	0.98
Cell maintenance & survival			70.1429	43.0357	-0.318321	-2.17961	0.0135346	0.675357	0.418214	1.16929
Clatherin-mediated endocytosis			80	43.5	-0.311818	-2.01426	0.0317833	0.545	0.32	0.81
Complement and coagulation cascades			40	33	0.432209	2.70825	0.0033934	0.82	0.415	1.395
Cytochrome p450			38	27.6	0.451844	2.62935	0.00240216	0.764	0.424	1.328
Fatty acid metabolism			91	48	-0.255051	-1.88583	0.0317476	0.55	0.35	0.84
Ion channel transport			31.5	20.5	-0.441543	-2.33052	0.00734574	0.705	0.29	0.99
Mitochondrial energy metabolism			92.7143	33.7143	0.292328	2.39569	0.00480965	0.385714	0.167143	0.467143
Neuron structure/growth			125	58.6	-0.335777	-2.32097	0.00677235	0.572	0.284	0.796
Neurotransmission			77.75	45.625	-0.35295	-2.42265	0.00718503	0.6425	0.36	1.03375
Not clustered: down-regulated			31.9	20.7	-0.389567	-2.0942	0.0202523	0.676	0.327	1.016
Not clustered: Upregulated			38.0833	25.4167	0.374825	2.1332	0.0165032	0.688333	0.3725	1.11167
Phospholipid metabolism			79	32.6667	-0.272774	-1.93879	0.0274632	0.44	0.226667	0.566667
Signal transduction, GF			71	33.75	-0.255876	-1.98444	0.0207757	0.4775	0.28	0.6625
Signal transduction, GPCR			198.143	130.429	0.263432	2.68266	0.0104847	0.671429	0.454286	1.21857
Signal transduction, MAPK			25	13	-0.381906	-1.93073	0.0281927	0.5125	0.22	0.67
Signal transduction, NGF			84.4	45.6	-0.282513	-2.19492	0.0144156	0.554	0.34	0.84
Transcription			69.9	45.9	-0.303932	-2.21756	0.0128457	0.685	0.424	1.199
Translation			88	33.875	0.329721	2.73133	0.00116665	0.39625	0.13375	0.4625
Vesicle-mediated transport			35.3333	23	-0.365519	-2.09716	0.0133023	0.66	0.363333	1.03333
Grand Total			72.3538	41.2385	-0.115856	-0.70412	0.0130313	0.617769	0.344846	0.984308

## Sheet: c. FDMR
Cluster Name	Pathway Name	Pathway Size	Number of core genes	Core genes	ES	NES	FDR q-value	Tag %	List %	Signal strength %
None	REACTOME_BILE_ACID_AND_BILE_SALT_METABOLISM	23	14	SLC10A1, ACOX2, AKR1D1, FABP6, CH25H, ABCC3, HSD17B4, ALB, ABCB11, CYP7B1, HSD3B7, SLCO1A2, AMACR, CYP46A1	-0.523822	-2.19694	0.0475276	0.61	0.25	0.81
