# Supplementary material for: Pathway analysis identifies altered mitochondrial metabolism, neurotransmission, structural pathways and complement cascade in retina/RPE/ choroid in chick model of form-deprivation myopia
Source: PubMed Central journal article supplement (PMC6026464; doi:10.7717/peerj.5048), 2018-06-27
Supplement: peerj-06-5048-s005.pdf [file peerj-06-5048-s005.pdf]

Supplementary Figure 1

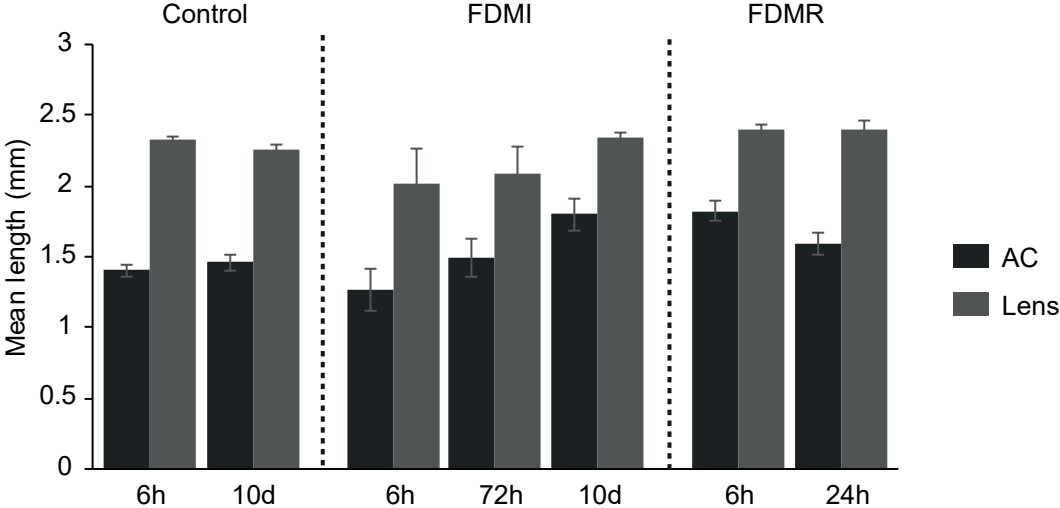

Supplementary Figure 1: Anterior chamber and lens thickness from FDMI and FDMR. Mean ( $\pm$ SE) measures of anterior chamber and lens thickness during normal development and following induction (FDMI) and recovery (FDMR) from form deprivation.
