# Supplementary material for: Pathway analysis identifies altered mitochondrial metabolism, neurotransmission, structural pathways and complement cascade in retina/RPE/ choroid in chick model of form-deprivation myopia
Source: PeerJ. 2018 Jun 27;6:e5048. doi: 10.7717/peerj.5048 (PMC6026464; doi:10.7717/peerj.5048)
Supplement: Table S1 — Form-deprivation (FD) myopia induction samples are Control_6h induction (GSM151367, GSM151368, GSM151441, GSM151442, GSM151443, GSM151444), FD_6h induction (GSM151445, GSM151446, GSM151447, GSM151449, GSM151450, GSM151451), Control_72h induction (GSM151452, GSM151453, GSM151454, GSM151455, GSM151456, GSM151457) & FD_72h induction (GSM151458, GSM151459, GSM151460, GSM151461, GSM151462, GSM151463). Form-deprivation myopia recovery samples are Control (af1c11867-NL), FD 10 days (af1c1186-FD-0 hrs), 6 h recovery (af1c1160-FD-6 hrs) & 24 h recovery (af1c1160-FD-24 hrs). [file peerj-06-5048-s002.xlsx]

## Sheet: Report1
Metric	Description	af1c11867-NL	af1c1186-FD-0hrs	af1c1160-FD-6hrs	af1c1160-FD-24hrs	GSM151367	GSM151368	GSM151441	GSM151442	GSM151443	GSM151444	GSM151445	GSM151446	GSM151447	GSM151449	GSM151450	GSM151451	GSM151452	GSM151453	GSM151454	GSM151455	GSM151456	GSM151457	GSM151458	GSM151459	GSM151460	GSM151461	GSM151462	GSM151463
#A	The number of probe sets absent	22393	23269	22335	22292	16964	16756	17165	17016	16613	17253	16843	17130	16335	16147	16607	16995	17254	17689	17796	17866	18044	19132	17574	17337	17043	18243	16876	17431
#M	The number of probe sets whose detection is marginal	585	584	597	637	598	589	572	551	579	618	571	578	549	553	596	587	497	563	508	497	510	532	537	477	540	482	498	516
#P	The number of probe sets present	15557	14682	15603	15606	20973	21190	20798	20968	21343	20664	21121	20827	21651	21835	21332	20953	20784	20283	20231	20172	19981	18871	20424	20721	20952	19810	21161	20588
%A	The percent of probe sets called present that are absent	58.1108	60.3841	57.9603	57.8487	44.0223	43.4825	44.5439	44.1573	43.1115	44.7723	43.7083	44.4531	42.39	41.9022	43.0959	44.1028	44.7749	45.9037	46.1814	46.363	46.825	49.6484	45.6053	44.9903	44.2273	47.3414	43.794	45.2342
%M	The percent of probe sets whose detection call is marginal	1.5181	1.51551	1.54924	1.65304	1.55184	1.52848	1.48436	1.42987	1.50253	1.60374	1.48177	1.49994	1.42468	1.43506	1.54665	1.52329	1.28974	1.46101	1.31828	1.28974	1.32347	1.38056	1.39354	1.23784	1.40132	1.25081	1.29233	1.33904
%P	The percent of probe sets present	40.3711	38.1004	40.4905	40.4982	54.4258	54.989	53.9717	54.4129	55.386	53.624	54.8099	54.047	56.1853	56.6628	55.3575	54.3739	53.9354	52.6353	52.5003	52.3472	51.8516	48.9711	53.0012	53.7719	54.3713	51.4078	54.9137	53.4268
all_probeset_atoms	The number of Perfect match - mismatch (PM–MM) probe pairs actually analyzed	424097	424097	424097	424097	424097	424097	424097	424097	424097	424097	424097	424097	424097	424097	424097	424097	424097	424097	424097	424097	424097	424097	424097	424097	424097	424097	424097	424097
all_probeset_mad_residual_mean	The mean absolute deviation of the residual for a chip versus all chips in the data set	0.508427	0.591513	0.527275	0.507137	0.2037	0.194956	0.188414	0.189405	0.173191	0.207662	0.18399	0.18983	0.173702	0.199236	0.186734	0.187465	0.195697	0.202866	0.19188	0.186815	0.215125	0.233947	0.188372	0.19362	0.188049	0.188411	0.181225	0.184673
all_probeset_mad_residual_stdev	The standard deviation of the residual for a chip versus all chips in the data set	0.268583	0.307343	0.280919	0.271124	0.105613	0.09862	0.094466	0.093575	0.086233	0.101414	0.094942	0.100402	0.086347	0.100102	0.094342	0.089981	0.106921	0.104264	0.102021	0.1029	0.10276	0.115601	0.102397	0.099574	0.105307	0.101956	0.09627	0.098836
all_probeset_mean	The mean signal value for all the probe sets	6.63111	6.61553	6.61771	6.61192	6.68362	6.69029	6.70892	6.69962	6.69686	6.68432	6.69656	6.68274	6.69905	6.68727	6.69573	6.69189	6.6925	6.70198	6.6913	6.68151	6.69857	6.69387	6.69424	6.68789	6.69308	6.69088	6.6865	6.69132
all_probeset_probesets	The number of probe sets actually analyzed	38535	38535	38535	38535	38535	38535	38535	38535	38535	38535	38535	38535	38535	38535	38535	38535	38535	38535	38535	38535	38535	38535	38535	38535	38535	38535	38535	38535
all_probeset_rle_mean	The mean absolute relative log expression (RLE)	0.638719	0.678383	0.617468	0.625038	0.165052	0.146922	0.160101	0.139702	0.128031	0.149772	0.137669	0.135915	0.136188	0.175146	0.14472	0.13052	0.15182	0.153225	0.137306	0.136194	0.153989	0.204185	0.140621	0.147234	0.160625	0.167012	0.17958	0.143616
all_probeset_rle_stdev	The standard deviation of the relative log expression (RLE)	0.613652	0.67478	0.618948	0.62238	0.211156	0.155753	0.169022	0.166719	0.151216	0.172486	0.174127	0.147724	0.150815	0.196139	0.177366	0.135572	0.195846	0.169399	0.138081	0.134751	0.170007	0.186992	0.166477	0.140438	0.217145	0.166898	0.182247	0.147811
all_probeset_stdev	The standard deviation for all of the probe sets analyzed	1.91632	1.89527	1.91526	1.89816	2.11158	2.10356	2.10883	2.12218	2.09973	2.09804	2.10647	2.10466	2.12868	2.14779	2.10108	2.09398	2.15133	2.12018	2.13083	2.11212	2.13818	2.03037	2.14084	2.15918	2.1382	2.13845	2.17074	2.14624
Alpha1	Significance level for the detection p-value in an analysis	0.05	0.05	0.05	0.05	0.05	0.05	0.05	0.05	0.05	0.05	0.05	0.05	0.05	0.05	0.05	0.05	0.05	0.05	0.05	0.05	0.05	0.05	0.05	0.05	0.05	0.05	0.05	0.05
Alpha2	Second significance level for the detection p-value in an analysis	0.065	0.065	0.065	0.065	0.065	0.065	0.065	0.065	0.065	0.065	0.065	0.065	0.065	0.065	0.065	0.065	0.065	0.065	0.065	0.065	0.065	0.065	0.065	0.065	0.065	0.065	0.065	0.065
apt-opt-probe-count	The number of probesets counted	968256	968256	968256	968256	968256	968256	968256	968256	968256	968256	968256	968256	968256	968256	968256	968256	968256	968256	968256	968256	968256	968256	968256	968256	968256	968256	968256	968256
apt-opt-set-analysis-name	The analysis algorithm used	rma	rma	rma	rma	rma	rma	rma	rma	rma	rma	rma	rma	rma	rma	rma	rma	rma	rma	rma	rma	rma	rma	rma	rma	rma	rma	rma	rma
BG	Background intensity calculated for the probe array	2	2	2	2	2	2	2	2	2	2	2	2	2	2	2	2	2	2	2	2	2	2	2	2	2	2	2	2
BG Avg	Average of the background intensity calculated for the probe array	62.3834	70.8708	87.4621	89.3482	55.9355	63.7406	71.6751	64.5026	67.2794	60.624	57.3257	67.1043	66.5006	58.5388	67.5524	73.2164	102.761	84.7062	114.373	110.88	104.644	101.246	95.6586	92.1902	82.3203	102.962	101.102	89.7116
BG Max	Maximum of the background intensity calculated for the probe array	65.0683	72.586	89.4984	91.8023	58.9396	66.488	73.8853	66.9874	69.8665	63.1461	59.3981	70.8758	68.497	61.2431	69.7109	75.7476	105.755	87.8952	118.435	113.84	109.879	104.276	97.5886	94.762	85.184	107.478	104.087	91.8626
BG Min	Minimum of the background intensity calculated for the probe array	60.0808	67.9751	82.0606	82.7232	50.7372	58.7371	67.5853	59.9292	63.0283	55.3993	53.0816	61.7955	60.1135	54.4972	63.0907	68.1359	98.006	79.3137	104.809	104.895	99.0882	97.7129	91.1537	86.1742	76.3063	98.2462	96.5266	84.5366
BG Std	Standard deviation of the background intensity calculated for the probe array	1.0254	0.753435	1.09535	1.31646	1.13201	1.03595	1.03072	0.860925	1.18322	0.964786	0.973138	1.22785	1.16174	1.20356	0.931286	1.10038	1.41272	1.56001	2.19332	1.57895	1.55917	0.940342	1.01168	1.48577	1.25121	1.6148	1.37986	1.20397
Central- Avg	The average cell intensity for the nine probe cells that comprise the cross at the center of an antisense probe array	13331	10863	10913	12456	19529	19603	16183	16529	19301	19575	19812	19370	17939	17530	19009	19395	19191	18043	19337	18754	19004	17863	18937	18497	18802	18266	20316	18625
Central- Count	The central count for the nine probe cells that comprise the cross at the center of an antisense probe array	9	9	9	9	9	9	9	9	9	9	9	9	9	9	9	9	9	9	9	9	9	9	9	9	9	9	9	9
Corner- Avg	The average cell intensity of the antisense probe cells used in the grid alignment process	12396	10541	10162	10953	15635	17870	15005	14460	16723	16900	17537	17407	17052	17007	16660	16666	18469	15697	18561	16105	16961	15253	17585	17133	16971	16842	19022	18219
Corner- Count	The corner count of the antisense probe cells used in the grid alignment process	32	32	32	32	32	32	32	32	32	32	32	32	32	32	32	32	32	32	32	32	32	32	32	32	32	32	32	32
Corner+ Avg	The average cell intensity for the sense probe cells used in the grid alignment process	144	139	129	138	95	104	92	91	99	98	105	101	96	99	99	104	144	114	137	137	115	101	127	120	105	118	158	140
Corner+ Count	The corner count for the sense probe cells used in the grid alignment process	32	32	32	32	32	32	32	32	32	32	32	32	32	32	32	32	32	32	32	32	32	32	32	32	32	32	32	32
Housekeeping_AFFX-Gga-ef1a_3_signal	The 3' signal for the probe sets that correspond to the housekeeping control, EF1a	14.1191	14.0361	14.172	14.0755	14.2071	14.2024	14.3102	14.2756	14.2825	14.1959	14.2888	14.2143	14.2104	14.275	14.2274	14.1939	14.2386	14.2004	14.2297	14.2344	14.3038	13.7829	14.2167	14.1806	14.2094	14.2397	14.2862	14.2165
Housekeeping_AFFX-Gga-ef1a_3-5-ratio	The 3'/5' ratio signal for the probe sets that correspond to the housekeeping control, EF1a	1.31841	1.43911	1.10456	1.51391	0.370609	0.354317	0.287846	0.458108	0.340214	0.29675	0.372339	0.431822	0.314067	0.318419	0.311534	0.318482	0.375021	0.429147	0.374353	0.346354	0.455879	0.39937	0.410993	0.343225	0.395569	0.466045	0.40338	0.384842
Housekeeping_AFFX-Gga-ef1a_5_signal	The 5' signal for the probe sets that correspond to the housekeeping control, EF1a	12.8007	12.597	13.0674	12.5616	13.8365	13.8481	14.0223	13.8175	13.9423	13.8991	13.9165	13.7825	13.8964	13.9566	13.9159	13.8754	13.8636	13.7712	13.8554	13.8881	13.8479	13.3836	13.8057	13.8374	13.8138	13.7736	13.8828	13.8316
Housekeeping_AFFX-Gga-ef1a_avg-signal	The average signal for the probe sets that correspond to the housekeeping control, EF1a	13.33	13.1737	13.5581	13.2569	13.9034	13.9183	14.0707	13.9569	14.0029	13.9546	13.9892	13.8888	13.965	14.0256	13.9586	13.9157	13.994	13.9087	13.9945	13.9961	14.0004	13.4974	13.9489	13.9284	13.9317	13.9482	14.0224	13.9583
Housekeeping_AFFX-Gga-ef1a_M_signal	The mean signal for the probe sets that correspond to the housekeeping control, EF1a	13.0701	12.8881	13.435	13.1337	13.6667	13.7044	13.8797	13.7777	13.7839	13.7687	13.7622	13.6695	13.788	13.8453	13.7324	13.6779	13.8798	13.7545	13.8986	13.8659	13.8497	13.3258	13.8244	13.7674	13.7719	13.8313	13.8984	13.8268
Housekeeping_AFFX-Gga-gapdh_3_signal	The 3' signal for the probe sets that correspond to the housekeeping control, GAPDH	14.4354	14.2776	14.2881	14.3335	14.3649	14.4018	14.3551	14.2678	14.3898	14.392	14.3373	14.3787	14.422	14.3335	14.3795	14.3374	14.2674	14.2465	14.3127	14.2971	14.2487	13.8016	14.2321	14.2238	14.2385	14.2323	14.2815	14.2855
Housekeeping_AFFX-Gga-gapdh_3-5-ratio	The 3'/5' ratio signal for the probe sets that correspond to the housekeeping control, GAPDH	0.074143	0.125737	0.006238	0.080224	-0.224119	-0.173132	-0.262942	-0.202249	-0.209843	-0.113919	-0.241513	-0.177073	-0.169191	-0.275033	-0.175835	-0.218021	-0.327642	-0.303928	-0.302208	-0.292037	-0.322404	-0.280659	-0.372501	-0.314369	-0.316841	-0.344697	-0.319274	-0.296862
Housekeeping_AFFX-Gga-gapdh_5_signal	The 5' signal for the probe sets that correspond to the housekeeping control, GAPDH	14.3612	14.1519	14.2819	14.2533	14.589	14.575	14.6181	14.4701	14.5997	14.5059	14.5788	14.5558	14.5912	14.6086	14.5554	14.5554	14.595	14.5504	14.6149	14.5892	14.5711	14.0822	14.6046	14.5382	14.5554	14.577	14.6008	14.5823
Housekeeping_AFFX-Gga-gapdh_avg-signal	The average signal for the probe sets that correspond to the housekeeping control, GAPDH	14.2961	14.0784	14.1931	14.1928	14.3572	14.3879	14.4349	14.3017	14.42	14.3383	14.37	14.3794	14.4178	14.378	14.3792	14.3684	14.3725	14.3223	14.4052	14.3932	14.3379	13.8955	14.371	14.3286	14.3255	14.3533	14.3821	14.3711
Housekeeping_AFFX-Gga-gapdh_M_signal	The mean signal for the probe sets that correspond to the housekeeping control, GAPDH	14.0916	13.8058	14.0093	13.9917	14.1178	14.1868	14.3314	14.1671	14.2706	14.117	14.194	14.2037	14.24	14.1919	14.2027	14.2124	14.2552	14.17	14.2879	14.2933	14.194	13.8028	14.2763	14.2239	14.1826	14.2508	14.264	14.2454
HZ	Number of horizontal zones used in background subtraction	4	4	4	4	4	4	4	4	4	4	4	4	4	4	4	4	4	4	4	4	4	4	4	4	4	4	4	4
mm_mean	The mean signal for all of the MM probes on the array	235.215	243.685	318.309	339.364	257.621	294.015	243.814	227.493	300.459	286.185	280.681	308.11	276.901	245.449	289.007	311.771	271.265	217.297	299.255	318.779	260.024	321.857	263.108	250.206	240.268	281.467	313.01	259.471
Norm Factor (NF)	The normalization factor computed by the algorithm	1	1	1	1	1	1	1	1	1	1	1	1	1	1	1	1	1	1	1	1	1	1	1	1	1	1	1	1
Noise Avg	The average noise calculated for the probe array	3.7584	4.00824	4.68362	4.9905	3.85234	4.24927	4.3907	3.77941	4.64309	4.02698	4.04075	4.39938	4.00814	3.44913	4.50247	4.707	5.33714	4.7224	5.92077	5.97101	5.39506	5.45443	5.20842	4.89971	4.68705	5.47573	5.60994	4.95423
Noise Max	The maximum noise calculated for the probe array	4.33306	4.30042	4.96576	5.2389	4.3326	4.688	5.3056	3.98288	5.15419	4.3927	4.53285	4.8753	4.51639	3.68971	6.03299	5.25189	6.05604	5.09795	7.21096	8.72001	5.79866	5.82993	5.48266	5.30566	5.25077	6.76938	6.05793	5.23968
Noise Min	The minimum noise calculated for the probe array	3.43618	3.78399	4.30907	4.58962	3.25679	3.84698	3.77334	3.4257	4.15249	3.28803	3.61818	3.91245	3.47152	3.06346	4.0187	4.24221	4.82803	4.40214	5.25371	5.32334	5.00856	4.96216	4.77257	4.53202	3.97892	4.85779	4.9633	4.47853
Noise Std	The standard deviation noise calculated for the probe array	0.147889	0.095133	0.107133	0.122192	0.17463	0.141638	0.228021	0.118249	0.168187	0.163246	0.145979	0.177475	0.154599	0.104628	0.30318	0.149711	0.204917	0.110543	0.260831	0.452076	0.137979	0.131434	0.115091	0.118976	0.162164	0.263649	0.176504	0.132212
pm_mean	The mean signal for all of the PM probes on the array	396.355	414.882	541.66	556.032	603.027	658.922	565.326	544.146	669.714	643.751	647.435	690.022	662.417	620.055	643.943	689.006	604.558	455.283	629.291	662.927	570.184	561.158	582.174	571.975	532.055	625.504	752.141	587.912
Raw Central- Avg	The average cell intensity before background adjustment for the sense probe cells that comprise the cross at the center of the array	13392.6	10933.6	11000.8	12546.3	19585.8	19667.7	16255.1	16593.8	19368.9	19636.1	19869	19438	18006	17588	19077.7	19468.4	19294	18127.9	19451.7	18864.9	19109.6	17965.2	19032.6	18590.2	18884.8	18369.3	20416.9	18715.2
Raw Central- Count	The average cell intensity before background adjustment for the anti sense probe cells that comprise the cross at the center of the array	9	9	9	9	9	9	9	9	9	9	9	9	9	9	9	9	9	9	9	9	9	9	9	9	9	9	9	9
Raw Corner- Avg	The average cell intensity prior to any background for the antisense probe cells adjustment used in the grid alignment process	12458.1	10612.1	10248.3	11041.3	15689.3	17933.1	15076.3	14523.9	16789.9	16959.9	17593.6	17472.9	17117.7	17065.6	16726.5	16738.3	18571	15780.9	18674.5	16214.7	17065	15353.3	17680	17223.9	17051.8	16943.6	19122.6	18308
Raw Corner- Count	The count of the number of antisense probe cells used in grid alignment	32	32	32	32	32	32	32	32	32	32	32	32	32	32	32	32	32	32	32	32	32	32	32	32	32	32	32	32
Raw Corner+ Avg	The average cell intensity prior to any background for the sense probe cells adjustment used in the grid alignment process	206.719	209.156	215.719	226.531	149.562	166.656	162.875	154.719	165.75	157.594	161.781	166.75	161.562	157.438	166.094	176.656	245.781	197.875	250.156	246.531	218.562	201.062	221.688	210.969	186.344	219.688	258.625	228.969
Raw Corner+ Count	The count of the number of sense probe cells used in grid alignment	32	32	32	32	32	32	32	32	32	32	32	32	32	32	32	32	32	32	32	32	32	32	32	32	32	32	32	32
RawQ	The degree of pixel-to-pixel variation among the probe cells used to calculate the background in the baseline probe array	2.18353	2.41235	2.72723	2.76338	2.0395	2.23247	2.59687	2.32832	2.45742	2.09176	2.0958	2.31242	2.34473	2.05121	2.33411	2.5992	3.39425	2.88729	3.77381	3.61488	3.46205	3.32401	3.19903	3.0988	2.81932	3.37953	3.39835	3.03368
Scale Factor (SF)	The scale factor specified in the Scaling tab of the Expression Analysis Settings dialog box or computed by the algorithm	0.157395	0.246086	0.130755	0.137383	0.144163	0.124449	0.161992	0.187601	0.116124	0.169713	0.140013	0.1217	0.132222	0.1708	0.118476	0.119863	0.179007	0.176691	0.174906	0.172318	0.180902	0.200059	0.16668	0.155734	0.12956	0.173803	0.131855	0.14311
Signal(M)	The average signal for probe sets whose detection call is marginal	8.46267	11.7175	8.12478	9.29786	7.9926	8.61282	8.28896	7.98423	8.48968	10.5487	9.24081	8.53106	7.70329	8.86217	7.80136	8.25915	8.88566	7.04962	9.71942	10.0816	8.18065	10.1463	8.07423	6.56028	5.72026	8.29293	7.27888	7.17503
Signal(P)	The average signal for the probe sets defined as present	55.1985	95.7617	63.5491	64.7407	80.2455	73.2919	84.4946	95.1604	68.6834	99.1817	83.0403	76.2568	80.119	98.4202	67.1283	73.5018	98.9428	70.6149	98.6586	101.783	95.764	86.5051	89.7773	83.0871	62.0523	104.024	95.336	78.8242
Spike_AFFX-r2-Bs-dap_3_signal	The 3' signal for the probe sets that correspond to the poly-A control, dap	9.76243	10.5182	8.50566	8.57425	10.8412	9.69425	10.2454	10.1032	9.37971	10.7035	9.96796	9.92113	10.1296	10.7502	9.53029	9.89856	9.6196	9.54261	9.62922	9.61923	9.61302	9.18269	9.62758	9.70801	9.80246	10.0748	9.75625	9.74213
Spike_AFFX-r2-Bs-dap_3-5-ratio	The 3'/5' ratio signal for the probe sets that correspond to the poly-A control, dap	1.3229	1.10568	1.88973	2.67434	1.70425	1.8303	1.66457	1.76689	1.55386	1.61518	1.74523	2.05776	1.76451	1.36739	1.73284	1.82938	1.08859	1.19047	1.0554	0.914156	0.965061	0.912786	1.1483	1.05854	0.977229	1.01523	0.94039	1.02475
Spike_AFFX-r2-Bs-dap_5_signal	The 5' signal for the probe sets that correspond to the poly-A control, dap	8.43953	9.41254	6.61593	5.89991	9.13693	7.86395	8.58085	8.33635	7.82585	9.08836	8.22273	7.86337	8.36509	9.38279	7.79745	8.06918	8.53101	8.35215	8.57382	8.70507	8.64796	8.2699	8.47929	8.64947	8.82523	9.05954	8.81586	8.71738
Spike_AFFX-r2-Bs-dap_avg-signal	The average signal for the probe sets that correspond to the poly-A control, dap	9.03774	9.84137	7.50734	7.12527	9.91678	8.68587	9.36271	9.19025	8.55786	9.80886	8.99731	8.8689	9.24891	9.99396	8.58412	8.86367	8.98246	8.84174	9.02855	9.09955	8.99277	8.66578	8.9646	9.04931	9.13381	9.49418	9.21428	9.13527
Spike_AFFX-r2-Bs-dap_M_signal	The mean signal for the probe sets that correspond to the poly-A control, dap	8.91126	9.59334	7.40045	6.90166	9.77225	8.49942	9.26187	9.13117	8.46801	9.63467	8.80124	8.82222	9.25203	9.84892	8.42461	8.62327	8.79677	8.63047	8.88261	8.97434	8.71735	8.54473	8.78694	8.79045	8.77375	9.34821	9.07073	8.94629
Spike_AFFX-r2-Bs-lys_3_signal	The 3' signal for the probe sets that correspond to the poly-A control, lys	5.76621	6.74041	5.49728	5.36378	7.17171	5.98576	6.27592	6.31813	5.81901	7.00755	6.17172	6.08089	6.56551	7.05641	5.87975	6.04752	6.10798	5.98781	6.0506	6.0049	5.91234	6.02427	5.95417	6.0729	6.03248	6.4357	6.10004	6.25656
Spike_AFFX-r2-Bs-lys_3-5-ratio	The 3'/5' ratio signal for the probe sets that correspond to the poly-A control, lys	0.912507	0.649743	1.28327	1.03094	1.71544	1.38856	0.914999	1.29686	1.28714	1.56742	1.34919	1.37362	1.52645	1.09948	1.51918	1.37067	1.29455	1.22694	1.20797	1.01748	0.772075	1.44651	1.2064	0.927003	1.19891	0.951864	1.27938	1.05637
Spike_AFFX-r2-Bs-lys_5_signal	The 5' signal for the probe sets that correspond to the poly-A control, lys	4.8537	6.09067	4.21401	4.33284	5.45627	4.5972	5.36092	5.02127	4.53187	5.44013	4.82253	4.70726	5.03906	5.95693	4.36057	4.67685	4.81344	4.76087	4.84262	4.98742	5.14027	4.57776	4.74777	5.1459	4.83357	5.48383	4.82065	5.20019
Spike_AFFX-r2-Bs-lys_avg-signal	The average signal for the probe sets that correspond to the poly-A control, lys	5.35035	6.31824	4.81112	4.7789	6.1074	5.21642	5.53407	5.56402	5.03176	6.07747	5.33142	5.27217	5.63078	6.40955	4.94178	5.21885	5.23027	5.1101	5.1936	5.37906	5.38381	5.11921	5.20969	5.5186	5.31037	5.87991	5.39767	5.57512
Spike_AFFX-r2-Bs-lys_M_signal	The mean signal for the probe sets that correspond to the poly-A control, lys	5.43113	6.12365	4.72205	4.64009	5.69421	5.06631	4.96537	5.35268	4.74441	5.78472	5.00001	5.02837	5.28777	6.2153	4.58502	4.93219	4.7694	4.58162	4.68759	5.14485	5.09883	4.75561	4.92714	5.337	5.06506	5.72019	5.27233	5.2686
Spike_AFFX-r2-Bs-phe_3_signal	The 3' signal for the probe sets that correspond to the poly-A control, phe	7.78012	8.43839	6.81967	6.86728	8.34216	6.92501	7.50858	7.62279	6.7351	8.18002	7.45287	7.27648	7.53776	8.59689	6.58513	7.01573	7.3867	6.80376	7.39978	7.28312	7.30532	6.93942	7.3747	7.41223	7.38878	7.84131	7.48519	7.43288
Spike_AFFX-r2-Bs-phe_3-5-ratio	The 3'/5' ratio signal for the probe sets that correspond to the poly-A control, phe	0.951222	1.49137	1.5466	1.72591	1.47128	1.20754	1.30893	1.38514	1.16656	1.6077	1.52846	1.51795	1.43597	1.48263	1.1252	1.51368	0.902238	0.880351	1.15888	0.995605	1.13373	0.936271	1.21991	1.21315	1.05939	0.967919	0.998339	1.06343
Spike_AFFX-r2-Bs-phe_5_signal	The 5' signal for the probe sets that correspond to the poly-A control, phe	6.8289	6.94702	5.27306	5.14136	6.87088	5.71747	6.19965	6.23764	5.56854	6.57231	5.92441	5.75854	6.10179	7.11425	5.45993	5.50205	6.48446	5.92341	6.24089	6.28752	6.17159	6.00315	6.1548	6.19908	6.32939	6.87339	6.48685	6.36944
Spike_AFFX-r2-Bs-phe_avg-signal	The average signal for the probe sets that correspond to the poly-A control, phe	7.16464	7.75143	5.83387	5.84813	7.28791	6.09867	6.62371	6.69956	5.99219	7.14037	6.46193	6.34308	6.62427	7.70281	5.87419	6.04929	6.61604	6.2708	6.61505	6.61279	6.48319	6.38014	6.5062	6.67612	6.62105	7.12128	6.77063	6.73682
Spike_AFFX-r2-Bs-phe_M_signal	The mean signal for the probe sets that correspond to the poly-A control, phe	6.8849	7.86888	5.40889	5.53575	6.65069	5.65351	6.16289	6.23825	5.67293	6.66879	6.00852	5.99421	6.23326	7.3973	5.57751	5.63011	5.97696	6.08522	6.20448	6.26773	5.97264	6.19786	5.9891	6.41704	6.14499	6.64914	6.33987	6.40814
Spike_AFFX-r2-Bs-thr_3_signal	The 3' signal for the probe sets that correspond to the poly-A control, thr	8.35757	9.14841	7.4123	7.07554	9.41365	7.83364	8.78599	8.5028	7.72725	8.805	8.13709	8.08257	8.53832	9.02406	7.81083	8.20379	8.06715	8.0751	8.1373	8.16857	8.00152	8.10062	7.94718	8.28323	8.08503	8.64111	8.28823	8.18013
Spike_AFFX-r2-Bs-thr_3-5-ratio	The 3'/5' ratio signal for the probe sets that correspond to the poly-A control, thr	0.462152	0.804133	0.368892	0.024931	2.03707	1.65013	1.68167	1.34621	1.42455	1.38233	1.57481	1.80035	1.52891	1.26664	1.53466	1.66913	1.24476	1.16869	1.08287	1.03206	1.00594	1.14364	0.828476	1.04544	1.00127	1.10034	1.19884	1.11008
Spike_AFFX-r2-Bs-thr_5_signal	The 5' signal for the probe sets that correspond to the poly-A control, thr	7.89541	8.34427	7.0434	7.05061	7.37657	6.18352	7.10432	7.15659	6.3027	7.42267	6.56228	6.28221	7.00941	7.75742	6.27618	6.53466	6.82238	6.90641	7.05443	7.13651	6.99558	6.95698	7.1187	7.23779	7.08376	7.54077	7.0894	7.07006
Spike_AFFX-r2-Bs-thr_avg-signal	The average signal for the probe sets that correspond to the poly-A control, thr	8.09608	8.6307	7.05606	6.85654	8.20281	6.8895	7.85265	7.67737	6.93433	8.00953	7.22788	7.10118	7.60429	8.34811	6.92129	7.25667	7.34479	7.31212	7.5024	7.54622	7.41461	7.40235	7.43791	7.62257	7.41479	7.95289	7.57918	7.50302
Spike_AFFX-r2-Bs-thr_M_signal	The mean signal for the probe sets that correspond to the poly-A control, thr	8.03527	8.39942	6.71247	6.44348	7.8182	6.65133	7.66763	7.37272	6.77306	7.80092	6.98426	6.93876	7.26514	8.26286	6.67687	7.03156	7.14483	6.95485	7.31547	7.33357	7.24673	7.14946	7.24784	7.34668	7.07558	7.67677	7.3599	7.25887
Spike_AFFX-r2-Ec-bioB_3_signal	The 3' signal for the probe sets that correspond to the hybridisation control, BioB	9.54938	9.32413	7.33313	7.26872	8.48007	7.93129	8.24992	8.28826	8.0693	8.12678	8.09294	8.04752	8.20108	8.42168	7.99936	7.67224	8.55326	8.50127	8.42851	8.37849	8.3249	8.25108	8.55304	8.44265	8.51504	8.50672	8.52739	8.6183
Spike_AFFX-r2-Ec-bioB_3-5-ratio	The 3'/5' ratio signal for the probe sets that correspond to the hybridisation control, BioB	0.658811	0.49984	0.21141	0.301501	0.118695	0.114099	0.179132	0.182686	0.286462	0.201584	0.177451	0.099125	0.165143	0.245279	0.167752	0.157183	0.117969	0.185858	0.136019	0.100708	0.092194	0.234572	0.192776	0.297163	0.385021	0.292445	0.216599	0.162043
Spike_AFFX-r2-Ec-bioB_5_signal	The 5' signal for the probe sets that correspond to the hybridisation control, BioB	8.89057	8.82429	7.12172	6.96721	8.36138	7.81719	8.07079	8.10557	7.78284	7.92519	7.91549	7.94839	8.03594	8.17641	7.8316	7.51506	8.43529	8.31542	8.29249	8.27778	8.23271	8.0165	8.36027	8.14549	8.13002	8.21428	8.31079	8.45625
Spike_AFFX-r2-Ec-bioB_avg-signal	The average signal for the probe sets that correspond to the hybridisation control, BioB	9.19175	8.9396	7.21143	7.18771	8.56747	8.06054	8.28387	8.31422	8.09898	8.2148	8.12485	8.0956	8.21559	8.38685	8.02327	7.73875	8.58077	8.4899	8.42607	8.43191	8.45717	8.2803	8.57044	8.41	8.44585	8.50301	8.54068	8.63387
Spike_AFFX-r2-Ec-bioB_M_signal	The mean signal for the probe sets that correspond to the hybridisation control, BioB	9.13531	8.67038	7.17944	7.32721	8.86095	8.43313	8.53089	8.54882	8.4448	8.59243	8.3661	8.29089	8.40975	8.56246	8.23885	8.02895	8.75374	8.65302	8.5572	8.63946	8.81389	8.57333	8.79802	8.64186	8.69248	8.78804	8.78385	8.82705
Spike_AFFX-r2-Ec-bioC_3_signal	The 3' signal for the probe sets that correspond to the hybridisation control, BioC	10.1685	10.065	7.46077	7.61278	9.75583	9.42567	9.53663	9.53262	9.33036	9.47706	9.41248	9.35479	9.53806	9.66327	9.34181	9.21394	9.73125	9.83916	9.72362	9.58559	9.62235	9.57335	9.7652	9.61444	9.69616	9.6734	9.68527	9.82283
Spike_AFFX-r2-Ec-bioC_3-5-ratio	The 3'/5' ratio signal for the probe sets that correspond to the hybridisation control, BioC	-0.189461	-0.353085	0.008864	-0.056622	-0.232426	-0.136534	-0.185599	-0.025723	-0.267929	-0.099521	-0.182189	-0.111921	-0.22523	-0.119872	-0.251581	-0.135566	-0.154148	-0.120862	-0.107739	-0.212461	-0.119702	-0.041813	-0.132144	-0.114578	-0.12888	-0.22928	-0.238875	-0.185649
Spike_AFFX-r2-Ec-bioC_5_signal	The 5' signal for the probe sets that correspond to the hybridisation control, BioC	10.358	10.418	7.4519	7.6694	9.98826	9.56221	9.72223	9.55834	9.59829	9.57658	9.59467	9.46671	9.76329	9.78314	9.59339	9.3495	9.8854	9.96003	9.83136	9.79805	9.74206	9.61516	9.89734	9.72902	9.82504	9.90268	9.92414	10.0085
Spike_AFFX-r2-Ec-bioC_avg-signal	The average signal for the probe sets that correspond to the hybridisation control, BioC	10.2633	10.2415	7.45633	7.64109	9.87204	9.49394	9.62944	9.54548	9.46432	9.52682	9.50357	9.41075	9.65068	9.7232	9.4676	9.28172	9.80832	9.89959	9.77749	9.69182	9.6822	9.59425	9.83127	9.67173	9.7606	9.78804	9.80471	9.91565
Spike_AFFX-r2-Ec-bioD_3_signal	The 3' signal for the probe sets that correspond to the hybridisation control, BioD	12.8999	12.7506	11.5687	11.6339	12.4459	12.207	12.1702	12.1609	12.1165	12.1528	12.0626	12.0922	12.1914	12.2572	12.0645	11.8414	12.2841	12.4031	12.2469	12.1836	12.3232	11.8315	12.2984	12.2116	12.32	12.1873	12.2428	12.4024
Spike_AFFX-r2-Ec-bioD_3-5-ratio	The 3'/5' ratio signal for the probe sets that correspond to the hybridisation control, BioD	0.16409	0.305354	0.285774	0.142782	0.300163	0.215385	0.204787	0.173607	0.22671	0.289931	0.256503	0.210388	0.172281	0.237704	0.190766	0.183901	0.068525	0.207151	0.140211	0.139839	0.236107	0.042371	0.116936	0.132134	0.154951	0.15271	0.198485	0.160337
Spike_AFFX-r2-Ec-bioD_5_signal	The 5' signal for the probe sets that correspond to the hybridisation control, BioD	12.7358	12.4452	11.283	11.4911	12.1458	11.9916	11.9654	11.9873	11.8898	11.8629	11.8061	11.8818	12.0191	12.0195	11.8737	11.6575	12.2155	12.1959	12.1067	12.0437	12.0871	11.7891	12.1815	12.0795	12.165	12.0345	12.0443	12.2421
Spike_AFFX-r2-Ec-bioD_avg-signal	The average signal for the probe sets that correspond to the hybridisation control, BioD	12.8178	12.5979	11.4259	11.5625	12.2959	12.0993	12.0678	12.0741	12.0032	12.0078	11.9344	11.987	12.1053	12.1383	11.9691	11.7495	12.2498	12.2995	12.1768	12.1137	12.2051	11.8103	12.2399	12.1456	12.2425	12.1109	12.1436	12.3222
Spike_AFFX-r2-P1-cre_3_signal	The 3' signal for the probe sets that correspond to the hybridisation control, cre	14.2393	13.9701	13.4973	13.6563	13.9708	13.9517	13.7605	13.766	13.8029	13.9407	13.8478	13.8546	13.8832	13.8861	13.8232	13.778	13.8854	14.0114	13.8147	13.7916	13.8267	13.3944	13.8619	13.912	13.9146	13.7928	13.8588	13.9626
Spike_AFFX-r2-P1-cre_3-5-ratio	The 3'/5' ratio signal for the probe sets that correspond to the hybridisation control, cre	0.147671	0.146653	0.231426	0.248199	0.251059	0.274378	0.325968	0.168375	0.249176	0.326507	0.287724	0.310309	0.346658	0.22698	0.278117	0.360255	0.234438	0.242448	0.259948	0.264984	0.160633	0.290819	0.279642	0.301258	0.245488	0.223463	0.246753	0.232299
Spike_AFFX-r2-P1-cre_5_signal	The 5' signal for the probe sets that correspond to the hybridisation control, cre	14.0916	13.8234	13.2658	13.4081	13.7197	13.6774	13.4346	13.5976	13.5537	13.6142	13.5601	13.5443	13.5365	13.6591	13.545	13.4177	13.651	13.769	13.5548	13.5266	13.666	13.1036	13.5822	13.6107	13.6692	13.5693	13.6121	13.7303
Spike_AFFX-r2-P1-cre_avg-signal	The average signal for the probe sets that correspond to the hybridisation control, cre	14.1654	13.8968	13.3815	13.5322	13.8453	13.8146	13.5975	13.6818	13.6783	13.7774	13.7039	13.6994	13.7098	13.7726	13.6841	13.5979	13.7682	13.8902	13.6848	13.6591	13.7463	13.249	13.7221	13.7613	13.7919	13.681	13.7355	13.8464
Tau	A user-modifiable parameter, ideally set to a value that is a little larger than the median of the discrimination scores of the probe sets whose targets are absent, to avoid false detected calls	0.015	0.015	0.015	0.015	0.015	0.015	0.015	0.015	0.015	0.015	0.015	0.015	0.015	0.015	0.015	0.015	0.015	0.015	0.015	0.015	0.015	0.015	0.015	0.015	0.015	0.015	0.015	0.015
Target Intensity (TGT)	Value used to compensate for the variability between chips.	500	500	500	500	500	500	500	500	500	500	500	500	500	500	500	500	500	500	500	500	500	500	500	500	500	500	500	500
Threshold Test	An indication of whether or not CHP files pass the user-defined tolerances for the array metrics.	Within Bounds	Within Bounds	Within Bounds	Within Bounds	Within Bounds	Within Bounds	Within Bounds	Within Bounds	Within Bounds	Within Bounds	Within Bounds	Within Bounds	Within Bounds	Within Bounds	Within Bounds	Within Bounds	Within Bounds	Within Bounds	Within Bounds	Within Bounds	Within Bounds	Within Bounds	Within Bounds	Within Bounds	Within Bounds	Within Bounds	Within Bounds	Within Bounds
VZ	Number of vertical zones used in background subtraction	4	4	4	4	4	4	4	4	4	4	4	4	4	4	4	4	4	4	4	4	4	4	4	4	4	4	4	4
