# Supplementary material for: Pathway analysis identifies altered mitochondrial metabolism, neurotransmission, structural pathways and complement cascade in retina/RPE/ choroid in chick model of form-deprivation myopia
Source: PeerJ. 2018 Jun 27;6:e5048. doi: 10.7717/peerj.5048 (PMC6026464; doi:10.7717/peerj.5048)
Supplement: Table S2 [file peerj-06-5048-s003.xlsx]

## Sheet: GeneInfo
Name & Alias	Description	Entrez Gene	SwissProt	RefSeq Protein ID	RefSeq Transcript ID
17.5; LOC776463	lectin-like protein; type II transmembrane protein (17.5); C-type lectin domain family 2 member D-like	396401; 776463	Q90636	NP_990760; XP_001235984	NM_205429; XM_001235983
A1CF	APOBEC1 complementation factor	423680	---	XP_003641506; XP_421561	XM_003641458; XM_421561
A2LD1	AIG2-like domain 1	418773	E1BZY3	XP_001231825; XP_003640587; XP_416969	XM_001231824; XM_003640539; XM_416969
A2M	alpha-2-macroglobulin	418251	E1C544	XP_416476	XM_416476
A2M; LOC425756	alpha-2-macroglobulin; alpha-2-macroglobulin-like	418251; 425756	E1C544	XP_416476	XM_416476; XR_027033
A2M; LOC427942	alpha-2-macroglobulin; alpha-2-macroglobulin-like protein 1-like	418251; 427942	E1C544	XP_416476; XP_425514	XM_416476; XM_425514
A4GALT	alpha 1,4-galactosyltransferase	418223	E1C034	XP_416448	XM_416448
A4GNT	alpha-1,4-N-acetylglucosaminyltransferase	429136	F1P4K1	XP_426692	XM_426692
AAAS	achalasia, adrenocortical insufficiency, alacrimia	100859661	H9L088	XP_003643473	XM_003643425
AACS	acetoacetyl-CoA synthetase	416811	F1NBY8; F1NFH5; Q5ZHT4; Q5ZL30; Q5ZLG0	NP_001006184	NM_001006184
AADACL2	arylacetamide deacetylase-like 2	425034	F1NBC2	XP_422836	XM_422836
AADACL4	arylacetamide deacetylase-like 4	419479	---	XP_003642580	XM_003642532
AADACL4; LOC768489; LOC768580	arylacetamide deacetylase-like 4; arylacetamide deacetylase-like 4-like; arylacetamide deacetylase-like 4-like	419479; 768489; 768580	F1P4H5; F1P4H6	XP_001231457; XP_001231604; XP_003642580	XM_001231456; XM_001231603; XM_003642532
AADAT	aminoadipate aminotransferase	428728	E1C9H5	XP_426286	XM_426286
AAED1	AhpC/TSA antioxidant enzyme domain containing 1	427472	F1NPK3	XP_003643058; XP_003643059; XP_003643060	XM_003643010; XM_003643011; XM_003643012
AAGAB	Alpha- and gamma-adaptin binding protein	415553	E1C7X1	---	XR_140226
AAK1	AP2 associated kinase 1	419512	F1NL20	XP_417663	XM_417663
AAMP	angio-associated, migratory cell protein	769880	F1ND84; F1P1L6; Q5ZLQ3	NP_001073215	NM_001079747
AANAT	aralkylamine N-acetyltransferase	396066	P79774	NP_990489	NM_205158
AARS	alanyl-tRNA synthetase	415668	F1P5J5; Q5ZKF3	NP_001005836	NM_001005836
AARS2	alanyl-tRNA synthetase 2, mitochondrial (putative)	421436	F1N8U6; F1NC50; Q5ZIA1	NP_001026227	NM_001031056
AARSD1	alanyl-tRNA synthetase domain containing 1	420013	---	XP_001235322	XM_001235321
AASDH	aminoadipate-semialdehyde dehydrogenase	422744	E1BSA3	XP_420697	XM_420697
AASDHPPT	aminoadipate-semialdehyde dehydrogenase-phosphopantetheinyl transferase	418975	F1P0E9	XP_417169	XM_417169
AASS	aminoadipate-semialdehyde synthase	417757	E1BWX4	XP_416001	XM_416001
AATF	apoptosis antagonizing transcription factor	417653	E1BR84; Q5ZIM6	NP_001025895	NM_001030724
AATK	apoptosis-associated tyrosine kinase	422076	F1NIL2	XP_420079	XM_420079
ABAT	4-aminobutyrate aminotransferase	416642	E1C8M8	XP_414940	XM_414940
ABCA1	ATP-binding cassette, sub-family A (ABC1), member 1	373945	E1C2W8; E1C619; Q8UVV4	NP_989476	NM_204145
ABCA12	ATP-binding cassette, sub-family A (ABC1), member 12	424011	E1C7T0	XP_421867	XM_421867
ABCA13	ATP-binding cassette, sub-family A (ABC1), member 13	420943	---	---	XR_027192
ABCA2	ATP-binding cassette, sub-family A (ABC1), member 2	426955	---	XP_003642316	XM_003642268
ABCA3	ATP-binding cassette, sub-family A (ABC1), member 3	416386	E1BVQ5	XP_414701	XM_414701
ABCA4	ATP-binding cassette, sub-family A (ABC1), member 4	424490	F1N8D7	XP_422330	XM_422330
ABCA5	ATP-binding cassette, sub-family A (ABC1), member 5	417444	E1BY40	XP_415695	XM_415695
ABCA7	ATP-binding cassette, sub-family A (ABC1), member 7	770610	---	XP_001233948	XM_001233947
ABCA8	ATP-binding cassette, sub-family A (ABC1), member 8	417440	F1NW73	XP_415691	XM_415691
ABCB1	ATP-binding cassette, sub-family B (MDR/TAP), member 1	420534	---	XP_418636	XM_418636
ABCB10	ATP-binding cassette, sub-family B (MDR/TAP), member 10	421537	F1NDU4	XP_419578	XM_419578
ABCB11	ATP-binding cassette, sub-family B (MDR/TAP), member 11	424170	---	XP_003641685	XM_003641637
ABCB6	ATP-binding cassette, sub-family B (MDR/TAP), member 6	425721	---	XP_423449	XM_423449
ABCB7	ATP-binding cassette, sub-family B (MDR/TAP), member 7	422326	E1C0W9	XP_420301	XM_420301
ABCB9	ATP-binding cassette, sub-family B (MDR/TAP), member 9	416834	F1NN89	XP_415125	XM_415125
ABCC1	ATP-binding cassette, sub-family C (CFTR/MRP), member 1	395416	F1NFV2; F1NZE5; F1P204; Q5F364; Q9I8K5	NP_001012540	NM_001012522
ABCC10	ATP-binding cassette, sub-family C (CFTR/MRP), member 10	421456	E1C368	XP_419506	XM_419506
ABCC2	ATP-binding cassette, sub-family C (CFTR/MRP), member 2	423828	E1C6S5	XP_421698	XM_421698
ABCC3	ATP-binding cassette, sub-family C (CFTR/MRP), member 3	422099	F1NM51	XP_420102	XM_420102
ABCC4	ATP-binding cassette, sub-family C (CFTR/MRP), member 4	418791	F1P043; Q5ZMK2	NP_001025990	NM_001030819
ABCC5	ATP-binding cassette, sub-family C (CFTR/MRP), member 5	424947	E1BXT6	XP_422754	XM_422754
ABCC6	ATP-binding cassette, sub-family C (CFTR/MRP), member 6	416600	---	NP_001239009	NM_001252080
ABCC8	ATP-binding cassette, sub-family C (CFTR/MRP), member 8	423072	E1C949	XP_421005	XM_421005
ABCC9	ATP-binding cassette, sub-family C (CFTR/MRP), member 9	418200	E1BZE8	XP_003640452	XM_003640404
ABCD2	ATP-binding cassette, sub-family D (ALD), member 2	417694	E1C5U3; F1NHC8	NP_001186324	NM_001199395
ABCD3	ATP-binding cassette, sub-family D (ALD), member 3	424487	Q5F4B9	NP_001012615	NM_001012597
ABCD4	ATP-binding cassette, sub-family D (ALD), member 4	423349	F1N9P5	XP_421264	XM_421264
ABCE1	ATP-binding cassette, sub-family E (OABP), member 1	422462	F1P0C9; F1P2B6; Q2PBA1; Q2UXM6; Q5ZJX6	NP_001006440	NM_001006440
ABCF2	ATP-binding cassette, sub-family F (GCN20), member 2	426038	F1NIH9; Q5ZHK3; Q5ZM62	NP_001006562	NM_001006562
ABCF3	ATP-binding cassette, sub-family F (GCN20), member 3	424950	F1P0V5	XP_422757	XM_422757
ABCG1	ATP-binding cassette, sub-family G (WHITE), member 1	418533	E1BYW4	XP_003640549; XP_416742	XM_003640501; XM_416742
ABCG2	ATP-binding cassette, sub-family G (WHITE), member 2	423767	E1BXG6; E1C5B1	XP_421638	XM_421638
ABCG4	ATP-binding cassette, sub-family G (WHITE), member 4	428242	E1C876	XP_425801	XM_425801
ABCG5	ATP-binding cassette, sub-family G (WHITE), member 5	421401	F1NGV5	XP_419457	XM_419457
ABCG8	ATP-binding cassette, sub-family G (WHITE), member 8	421402	F1NGV3	XP_419458	XM_419458
ABHD10	abhydrolase domain containing 10	418419	F1NKJ7	XP_416633	XM_416633
ABHD11	abhydrolase domain containing 11	417473	---	XP_415721	XM_415721
ABHD12	abhydrolase domain containing 12	421249	F1P0A0; Q5ZIN0	NP_001012889	NM_001012871
ABHD13	Abhydrolase domain containing 13	418763	Q5ZJL8	NP_001008681	NM_001008681
ABHD2	Abhydrolase domain containing 2	415493	---	XP_413866	XM_413866
ABHD3	abhydrolase domain containing 3	421068	F1NTP8	XP_419156	XM_419156
ABHD5	abhydrolase domain containing 5	420673	B3TZB3; Q5ZKV3	NP_001006365	NM_001006365
ABI1	abl-interactor 1	420489	E1BWJ8; E1C1N9; F1P5N0; Q5ZIL8	NP_001034370; XP_001233769; XP_001233780; XP_001233799; XP_001233813; XP_003640703; XP_003640704; XP_003640705; XP_003640706	NM_001039281; XM_001233768; XM_001233779; XM_001233798; XM_001233812; XM_003640655; XM_003640656; XM_003640657; XM_003640658
ABI2	abl-interactor 2	424108	---	XP_001232713; XP_001232772; XP_003641614; XP_421962	XM_001232712; XM_001232771; XM_003641566; XM_421962
ABI3	ABI family, member 3	419988	E1BQK3	XP_418110	XM_418110
ABI3BP	ABI family, member 3 (NESH) binding protein	769237	---	XP_001232472	XM_001232471
ABL1	c-abl oncogene 1, non-receptor tyrosine kinase	417181	F1NCD9; Q98946	XP_001233812	XM_001233811
ABL2	V-abl Abelson murine leukemia viral oncogene homolog 2	395410	Q9YI46	XP_422269	XM_422269
ABLIM1	Actin binding LIM protein 1	423911	---	NP_001152835	NM_001159363
ABLIM2	actin binding LIM protein family, member 2	422866	---	XP_420811	XM_420811
ABLIM3	actin binding LIM protein family, member 3	416201	---	XP_414527	XM_414527
ABTB1	ankyrin repeat and BTB (POZ) domain containing 1	416026	F1N9Z2; Q5ZKS9	NP_001025769	NM_001030598
ABTB2	ankyrin repeat and BTB (POZ) domain containing 2	425717	---	XP_423445	XM_423445
ACAA1	acetyl-CoA acyltransferase 1	770094	F1NB64	NP_001184217	NM_001197288
ACAA2	acetyl-CoA acyltransferase 2	426847	F1N8J0; Q5ZLW8	NP_001006571	NM_001006571
ACACA	acetyl-CoA carboxylase alpha	396504	F1NNT2; F1NWT0; F1P5V8; P11029; Q98909	NP_990836	NM_205505
ACACB	acetyl-CoA carboxylase beta	430557	F1NH15; F1P1B5	XP_428114	XM_428114
ACAD10	acyl-Coenzyme A dehydrogenase family, member 10	416879	F1NFN5; F1NIE5	XP_415170	XM_415170
ACAD11	acyl-CoA dehydrogenase family, member 11	420689	F1NQ86; F1NU10; Q5ZHT1	NP_001006367	NM_001006367
ACAD8	acyl-CoA dehydrogenase family, member 8	419739	F1NNW2	XP_417879	XM_417879
ACAD9	acyl-CoA dehydrogenase family, member 9	415974	F1N8C3; F1NEF6; Q5ZJ68	NP_001006136	NM_001006136
ACADL	acyl-CoA dehydrogenase, long chain	424005	E1BQB6; F1NC38; Q5ZJ93	NP_001006511	NM_001006511
ACADS	acyl-CoA dehydrogenase, C-2 to C-3 short chain	416969	Q5ZL56	NP_001006193	NM_001006193
ACADSB	acyl-CoA dehydrogenase, short/branched chain	423947	F1NZ81; Q5ZK70	NP_001026411	NM_001031240
ACAN	aggrecan	395798	F1NZX1; P07898; P79787	NP_990286; XP_001232950	NM_204955; XM_001232949
ACAP2	ArfGAP with coiled-coil, ankyrin repeat and PH domains 2	424895	F1NG96; Q5ZK62	NP_001006548	NM_001006548
ACAP3	ArfGAP with coiled-coil, ankyrin repeat and PH domains 3	419420	F1NGZ5	XP_417581	XM_417581
ACAT1	acetyl-CoA acetyltransferase 1	418968	E1C0Q5	XP_417162	XM_417162
ACAT2	acetyl-CoA acetyltransferase 2	421587	E1BV95; F1NT20; Q5ZHQ4	NP_001034376	NM_001039287
ACBD3	acyl-CoA binding domain containing 3	421317	F1P5I8; Q5ZJ14	NP_001026214	NM_001031043
ACBD5	Acyl-CoA binding domain containing 5	420488	F1NM57; F1NM58; Q5ZHQ6	NP_001006356	NM_001006356
ACBD6	acyl-CoA binding domain containing 6	424416	E1C483	XP_422259	XM_422259
ACBD7	acyl-CoA binding domain containing 7	420531	F1NFU9	XP_429769	XM_429769
ACCN1	amiloride-sensitive cation channel 1, neuronal	419945	F1NU43	XP_418066	XM_418066
ACCN2	amiloride-sensitive cation channel 2, neuronal	426883	H9KZE2; H9L3S2; Q1XA76	NP_001035557	NM_001040467
ACCN4	amiloride-sensitive cation channel 4, pituitary	769191	---	XP_001232417	XM_001232416
ACCN5	amiloride-sensitive cation channel 5, intestinal	428723	F1P0L7	XP_426281	XM_426281
ACE	angiotensin I converting enzyme (peptidyl-dipeptidase A) 1	419953	F1NNH3; F1NYM0; Q10751	NP_001161204	NM_001167732
ACE2	Angiotensin I converting enzyme (peptidyl-dipeptidase A) 2	418623	C7ECT7; F1NHR4	XP_416822	XM_416822
ACER1	alkaline ceramidase 1	420088	---	XP_418208	XM_418208
ACER2	alkaline ceramidase 2	427235	E1C990	XP_424820	XM_424820
ACHE	acetylcholinesterase	396388	Q6ZXJ5	NP_990749	NM_205418
ACLY	ATP citrate lyase	395373	F1NPU6; F1P269; F1P272; Q5F3V2; Q9PU50	NP_001025711	NM_001030540
ACMSD	aminocarboxymuconate semialdehyde decarboxylase	424288	F1NEK9	XP_422133	XM_422133
ACN9	ACN9 homolog (S. cerevisiae)	420572	F1NWI0	XP_418673	XM_418673
ACO1	aconitase 1, soluble	373916	F1NFY7; F1NY25; Q90875; Q9I862	NP_001025707	NM_001030536
ACO2	aconitase 2, mitochondrial	374009	Q5ZMW1; Q8AYI3	NP_989519	NM_204188
ACOT11	acyl-CoA thioesterase 11	429108	E1BZQ4	XP_426664	XM_426664
ACOT12	acyl-CoA thioesterase 12	431627	F1NDD5	XP_429179	XM_429179
ACOT13	Acyl-CoA thioesterase 13	421006	F1NW39	XP_419092	XM_419092
ACOT7	acyl-CoA thioesterase 7	419371	F1NSJ2	XP_003642581; XP_417533	XM_003642533; XM_417533
ACOT8	acyl-CoA thioesterase 8	419303	E1BVK8	XP_417475	XM_417475
ACOT9	acyl-CoA thioesterase 9	418600	Q5F3B4	NP_001012841	NM_001012823
ACOX1	acyl-CoA oxidase 1, palmitoyl	417366	F1NY37; Q5ZM10	NP_001006205	NM_001006205
ACOX2	acyl-CoA oxidase 2, branched chain	416068	E1C5V6	XP_414406	XM_414406
ACOX3	acyl-CoA oxidase 3, pristanoyl	422869	E1C1E9	XP_420814	XM_420814
ACP1	acid phosphatase 1, soluble	421909	Q5ZKG5	NP_001034380	NM_001039291
ACP2	acid phosphatase 2, lysosomal	428864	F1NDT9; Q5ZIB1	NP_001026719	NM_001031548
ACP6	acid phosphatase 6, lysophosphatidic	418458	F1NRT5	XP_416667	XM_416667
ACPL2	acid phosphatase-like 2	424815	---	XP_422630	XM_422630
ACPP	acid phosphatase, prostate	776390	F1NT31	XP_001235914	XM_001235913
ACR	acrosin	426864	---	XP_003640366	XM_003640318
ACSBG1	acyl-CoA synthetase bubblegum family member 1	415361	F1NLD6	XP_413747	XM_413747
ACSBG2	acyl-CoA synthetase bubblegum family member 2	420090	F1NI43; Q5ZKR7	NP_001012864	NM_001012846
ACSF2	acyl-CoA synthetase family member 2	422102	E1BS15; E1BVI3	XP_420105	XM_420105
ACSF3	acyl-CoA synthetase family member 3	427561	F1NXK4	XP_425134	XM_425134
ACSL1	acyl-CoA synthetase long-chain family member 1	422547	Q5F420	NP_001012596	NM_001012578
ACSL3	acyl-CoA synthetase long-chain family member 3	424810	F1P451	XP_422625	XM_422625
ACSL4	acyl-CoA synthetase long-chain family member 4	422345	F1ND19	XP_420317	XM_420317
ACSL5	acyl-CoA synthetase long-chain family member 5	423896	F1NNV2; Q5ZIG7	NP_001026408	NM_001031237
ACSL6	acyl-CoA synthetase long-chain family member 6	416324	---	XP_414641	XM_414641
ACSM3	acyl-CoA synthetase medium-chain family member 3	426999	F1NVA1	XP_424601	XM_424601
ACSM4	acyl-CoA synthetase medium-chain family member 4	426991	F1P5K1	XP_424595	XM_424595
ACSM5	acyl-CoA synthetase medium-chain family member 5	426992	F1P5K2	XP_424596	XM_424596
ACSS1	acyl-CoA synthetase short-chain family member 1	416714	F1NLR1	XP_415011	XM_415011
ACSS2	acyl-CoA synthetase short-chain family member 2	419158	F1NST1	XP_417342	XM_417342
ACSS3	acyl-CoA synthetase short-chain family member 3	417875	F1NSL2; F1P5S3; F1P5S5	XP_416118	XM_416118
ACTA1; ACTBL2; ACTC1	actin, alpha 1, skeletal muscle; actin, beta-like 2; actin, alpha, cardiac muscle 1	421534; 423298; 426652	F1N8P3; P68034	NP_001026234; NP_001072949; XP_422898; XP_424279	NM_001031063; NM_001079481; XM_422898; XM_424279
ACTA2; ACTG2	actin, alpha 2, smooth muscle, aorta; actin, gamma 2, smooth muscle, enteric	396084; 423787	F1P2P8; F1P476; H9KYU9; P08023; P63270	NP_001026400; NP_990503	NM_001031229; NM_205172
ACTB	actin, beta	396526	A9YXX2; B5M200; C3VQ53; G4WW42; G8HUH5; P60706; Q0QWA1; Q5ZLX9; Q90736	NP_990849	NM_205518
ACTB; ACTG1; LOC776816	actin, beta; actin, gamma 1; actin, cytoplasmic 2-like	396526; 415296; 776816	A9YXX2; A9YXX3; B5M200; C3VQ53; F1N835; F1P252; G1K2Y7; G4WW42; G8HUH5; P53478; P60706; Q0QWA1; Q5ZLX9; Q5ZMQ2; Q90736	NP_001007825; NP_990849; XP_001236316	NM_001007824; NM_205518; XM_001236315
ACTBL2	Actin, beta-like 2	426652	F1N8P3	XP_422898; XP_424279	XM_422898; XM_424279
ACTG1	Actin, gamma 1	415296	Q5ZMQ2	NP_001007825	NM_001007824
ACTG2	actin, gamma 2, smooth muscle, enteric	396084	H9KYU9; P63270	NP_990503	NM_205172
ACTL6A	actin-like 6A	424975	E1BR36	XP_422784	XM_422784
ACTL9	actin-like 9	428337	F1NUK6	XP_425897	XM_425897
ACTN1	Actinin, alpha 1	373918	F1NCV1; F1NJ54; P05094; Q5ZIW4; Q5ZJN7	NP_989458	NM_204127
ACTN2	Actinin, alpha 2	396263	P20111	NP_990654	NM_205323
ACTN4	actinin, alpha 4	396024	Q90734	NP_990457	NM_205126
ACTR10; LOC100859826	actin-related protein 10 homolog (S. cerevisiae); actin-related protein 10-like	100859826; 423543	E1C351; F1NG10; Q5ZID3	NP_001006492; XP_003641470	NM_001006492; XM_003641422
ACTR1A	ARP1 actin-related protein 1 homolog A, centractin alpha (yeast)	423862	Q5ZM58	NP_001007949	NM_001007948
ACTR2	ARP2 actin-related protein 2 homolog (yeast)	396147	F1NHN5; F1NRM5; P53488	NP_990555	NM_205224
ACTR3	ARP3 actin-related protein 3 homolog (yeast)	374197	Q90WD0	NP_989638	NM_204307
ACTR3B	ARP3 actin-related protein 3 homolog B (yeast)	420439	F1NW48	XP_418544	XM_418544
ACTR5	ARP5 actin-related protein 5 homolog (yeast)	419169	Q5ZJA4	NP_001008446	NM_001008446
ACTR6	ARP6 actin-related protein 6 homolog (yeast)	395348	F1P1Q9; Q5ZLH2; Q9DEE9	NP_989968	NM_204637
ACTR8	ARP8 actin-related protein 8 homolog (yeast)	415994	F1NXV7	XP_414336	XM_414336
ACTRT2	actin-related protein T2	428178	E1BXV2	XP_425736	XM_425736
ACVR1	activin A receptor, type I	395246	F1NC95; Q90ZK6	NP_989891	NM_204560
ACVR1B	activin A receptor, type IB	768878	H9KZW0; H9L0L7	XP_001231301	XM_001231300
ACVR1C	activin A receptor, type IC	424325	F1NC97	XP_422170	XM_422170
ACVR2A	activin A receptor, type IIA	396324	Q90669; Q9PSG1	NP_990698	NM_205367
ACVR2B	activin A receptor, type IIB	374213	F1N8I2; F1NCI7; F1NL28; Q90670	NP_989648	NM_204317
ACYP1	acylphosphatase 1, erythrocyte (common) type	423361	F1NR40; P07032	NP_001161477	NM_001168005
ACYP2	acylphosphatase 2, muscle type	421217	F1ND50; P07031	NP_001161234	NM_001167762
ADA	adenosine deaminase	419194	F1P2A6; Q5ZKP6	NP_001006290	NM_001006290
ADAD1	adenosine deaminase domain containing 1 (testis-specific)	422669	F1NK43	XP_420624	XM_420624
ADAL; TM2D3	adenosine deaminase-like; TM2 domain containing 3	415390; 415391	F1NUA8; F1NWZ6; F1NX03; Q5F434	NP_001025718; XP_003641887; XP_413775	NM_001030547; XM_003641839; XM_413775
ADAM10	ADAM metallopeptidase domain 10	374113	F1P1J6; Q5F3N4; Q5F458; Q8QFX0	NP_989592	NM_204261
ADAM12	ADAM metallopeptidase domain 12	425843	B8XA31; D6R189; F1NW99	NP_001136322	NM_001142850
ADAM15	ADAM metallopeptidase domain 15	419050	---	XP_417241	XM_417241
ADAM17	ADAM metallopeptidase domain 17	421931	E1BY60; Q5QHR9; Q5ZL93	NP_001008682	NM_001008682
ADAM19	ADAM metallopeptidase domain 19	416244	E1AP05; F1NN79	NP_001182051	NM_001195122
ADAM20	ADAM metallopeptidase domain 20	404294	F1NFZ4; Q76KT5	NP_996860	NM_206977
ADAM22	ADAM metallopeptidase domain 22	420537	---	NP_001138700	NM_001145228
ADAM23	ADAM metallopeptidase domain 23	424099	B8XA33; F1NYC6	NP_001138702	NM_001145230
ADAM28	ADAM metallopeptidase domain 28	419529	F1NU65; F1NU67; Q5F3G5	XP_001233496	NM_001030887; XM_001233495
ADAM32	ADAM metallopeptidase domain 32	426784	---	XP_424396	XM_424396
ADAM33	ADAM metallopeptidase domain 33	422948	A3EYJ5; F1P2E1	NP_001075887	NM_001082418
ADAM5P	ADAM metallopeptidase domain 5, pseudogene	423946	F1P168	XP_421805	XM_421805
ADAM8	ADAM metallopeptidase domain 8	423672	---	XP_421552	XM_421552
ADAM9	ADAM metallopeptidase domain 9	426781	F1NSQ3; F1P5X3; Q5ZJH4	NP_001026567	NM_001031396
ADAMTS1	ADAM metallopeptidase with thrombospondin type 1 motif, 1	418479	F1P3T6	XP_416687	XM_416687
ADAMTS10	ADAM metallopeptidase with thrombospondin type 1 motif, 10	769592	F1NPG0	XP_001232250	XM_001232249
ADAMTS12	ADAM metallopeptidase with thrombospondin type 1 motif, 12	427428	---	XP_003643023	XM_003642975
ADAMTS13	ADAM metallopeptidase with thrombospondin type 1 motif, 13	417152	E1C7E8	XP_415435	XM_415435
ADAMTS14	ADAM metallopeptidase with thrombospondin type 1 motif, 14	423712	F1NQ88	XP_003641522	XM_003641474
ADAMTS15	ADAM metallopeptidase with thrombospondin type 1 motif, 15	419733	E1BX45	XP_417874	XM_417874
ADAMTS17	ADAM metallopeptidase with thrombospondin type 1 motif, 17	415515	E1C7P3	XP_413886	XM_413886
ADAMTS18	ADAM metallopeptidase with thrombospondin type 1 motif, 18	100858277	E1C028	XP_003641985	XM_003641937
ADAMTS19	ADAM metallopeptidase with thrombospondin type 1 motif, 19	415600	E1C0E3	XP_413968	XM_413968
ADAMTS2	ADAM metallopeptidase with thrombospondin type 1 motif, 2	416291	F1N9Z1	XP_414611	XM_414611
ADAMTS20	ADAM metallopeptidase with thrombospondin type 1 motif, 20	417794	E1BSZ8	XP_416037	XM_416037
ADAMTS3	ADAM metallopeptidase with thrombospondin type 1 motif, 3	428760	F1NVD1	XP_426316	XM_426316
ADAMTS5	ADAM metallopeptidase with thrombospondin type 1 motif, 5	427971	F1P3S7	XP_425541	XM_425541
ADAMTS6	ADAM metallopeptidase with thrombospondin type 1 motif, 6	427160	---	XP_424749	XM_424749
ADAMTS7	ADAM metallopeptidase with thrombospondin type 1 motif, 7	415570	F1ND06	XP_003641878	XM_003641830
ADAMTS8	ADAM metallopeptidase with thrombospondin type 1 motif, 8	769222	---	XP_001232457	XM_001232456
ADAMTS9	ADAM metallopeptidase with thrombospondin type 1 motif, 9	416080	E1C6T5	XP_414417	XM_414417
ADAMTSL1	ADAMTS-like 1	431603	---	XP_429157	XM_429157
ADAMTSL2	ADAMTS-like 2	417147	F1N9F7	XP_003642352	XM_003642304
ADAMTSL3	ADAMTS-like 3	415465	---	XP_413844	XM_413844
ADAP1	ArfGAP with dual PH domains 1	416451	F1NK48	XP_414759	XM_414759
ADAP2	ArfGAP with dual PH domains 2	417409	F1NJ84	XP_415661	XM_415661
ADAR	adenosine deaminase, RNA-specific	769675	H9L1D4; H9L3K3; Q2P9U9	XP_001232162	XM_001232161
ADARB1	adenosine deaminase, RNA-specific, B1	374087	F1NGD2; F1NGD4; Q90VV7; Q90VZ5	NP_001104544; NP_989571	NM_001111074; NM_204240; NR_004440
ADARB2	adenosine deaminase, RNA-specific, B2	420461	F1NX88	XP_418563	XM_418563
ADAT1	adenosine deaminase, tRNA-specific 1	415886	Q5ZI16	NP_001012797	NM_001012779
ADAT2	Adenosine deaminase, tRNA-specific 2	421670	---	XP_419709	XM_419709
ADC	arginine decarboxylase	428228	E1C5E7	XP_003642620; XP_425787	XM_003642572; XM_425787
ADCK1	aarF domain containing kinase 1	423382	F1NNJ1; Q5ZMT7	NP_001073199	NM_001079731
ADCK2	aarF domain containing kinase 2	418116	F1P1M5	XP_416350	XM_416350
ADCK3	aarF domain containing kinase 3	416745	F1NGM2	NP_001186342	NM_001199413
ADCY1	adenylate cyclase 1 (brain)	420788	F1NDI5	XP_418883	XM_418883
ADCY2	adenylate cyclase 2 (brain)	420935	E1BX91	XP_419020	XM_419020
ADCY3	adenylate cyclase 3	422013	F1NGF1	XP_003641104	XM_003641056
ADCY5	adenylate cyclase 5	395340	F1NEC3; F1NSD1; Q9DGG7; Q9PS92	NP_989962	NM_204631
ADCY7	adenylate cyclase 7	415732	E1C8F6	XP_414097	XM_414097
ADCY8	adenylate cyclase 8 (brain)	420328	E1BTI9	XP_418437	XM_418437
ADCY9	adenylate cyclase 9	395339	F1NP57; Q9DGG6	NP_989961	NM_204630
ADCYAP1	adenylate cyclase activating polypeptide 1 (pituitary)	408251	P41534	NP_001001291	NM_001001291
ADCYAP1R1	adenylate cyclase activating polypeptide 1 (pituitary) receptor type I	420386	A5YMQ0; F1P424	NP_001092076	NM_001098606
ADD1	adducin 1 (alpha)	422882	F1ND55; Q5F3S3	NP_001073198	NM_001079730
ADD3	adducin 3 (gamma)	373892	F1NEA1; F1NYZ5; Q5F3U8; Q8AVB3	NP_989434	NM_204103
ADH1C	Alcohol dehydrogenase 1C (class I), gamma polypeptide	771920	E1C2R2; E1C829; F1NKS7; F1NKS8; F1NTZ0; P23991	XP_001234263	XM_001234262
ADH1C; ADH6; LOC100857280	alcohol dehydrogenase 1C (class I), gamma polypeptide; alcohol dehydrogenase 6 (class V); alcohol dehydrogenase 1-like	100857280; 395979; 771920	E1C2R2; E1C829; F1NKS7; F1NKS8; F1NTZ0; O42483; P23991	NP_990423; XP_001234263	NM_205092; XM_001234262; XR_140123
ADH5	Alcohol dehydrogenase 5 (class III), chi polypeptide	422705	Q5ZK81; Q6EE33	NP_001026323	NM_001031152
ADHFE1	alcohol dehydrogenase, iron containing, 1	426446	F1NZ93	XP_424090	XM_424090
ADI1	acireductone dioxygenase 1	421918	Q5ZL43	NP_001026260	NM_001031089
ADIPOQ	adiponectin, C1Q and collagen domain containing	404536	F1NRD4; Q4VKW2; Q6QWE7	NP_996874	NM_206991
ADIPOR1	adiponectin receptor 1	421148	F1NM81; Q4PKP2	NP_001026198	NM_001031027
ADIPOR2	adiponectin receptor 2	418155	Q4PKP1; Q5ZMH3	NP_001007855	NM_001007854
ADK	adenosine kinase	423735	Q5ZMK9	NP_001006501	NM_001006501
ADM	adrenomedullin	423042	E1C9E8	XP_420975	XM_420975
ADMP	anti-dorsalizing morphogenetic protein	395622	Q9PVK1	NP_990153	NM_204822
ADNP	activity-dependent neuroprotector homeobox	419350	E1C3L1	XP_001232401	XM_001232400
ADNP2	ADNP homeobox 2	420805	---	XP_418898	XM_418898
ADORA1	adenosine A1 receptor	374212	P49892	NP_989647	NM_204316
ADORA2A	adenosine A2a receptor	427705	E1BXP5	XP_425280	XM_425280
ADORA2B	adenosine A2b receptor	395971	F1NMX2; O13076; Q8JHF7	NP_990418	NM_205087
ADORA3	adenosine A3 receptor	373956	F1NSB8; Q9W6C4	NP_989482	NM_204151
ADPGK	ADP-dependent glucokinase	415317	F1NGR5	XP_413705	XM_413705
ADPRH	ADP-ribosylarginine hydrolase	426545	H9KZU3	XP_424183	XM_424183
ADPRHL1	ADP-ribosylhydrolase like 1	418741	E1BT77	XP_416940	XM_416940
ADPRHL2	ADP-ribosylhydrolase like 2	419626	F1P191; Q5ZI51	NP_001006312	NM_001006312
ADRA1A	adrenergic, alpha-1A-, receptor	374057	Q8AY72	---	---
ADRA1B	adrenergic, alpha-1B-, receptor	373890	F1NIZ5; Q804K1	XP_414483	XM_414483
ADRA1D	adrenergic, alpha-1D-, receptor	422933	F1NK17; F1P501	XP_420871	XM_420871
ADRA2C	adrenergic, alpha-2C-, receptor	428799	F1NDD8	XP_426355	XM_426355
ADRB2	adrenergic, beta-2-, receptor, surface	427623	F1N9W0	XP_425195	XM_425195
ADRBK1	adrenergic, beta, receptor kinase 1	426000	H9L141; Q5ZJB8	NP_001026524	NM_001031353
ADRBK2	adrenergic, beta, receptor kinase 2	416904	F1NTL1	XP_415195	XM_415195
ADRM1	Adhesion regulating molecule 1	395365	Q98SH3	NP_989982	NM_204651
ADSL	adenylosuccinate lyase	396540	E1BR00; F1NDB3; P21265; Q5U7A2; Q5U7A3; Q683M9	NP_990860	NM_205529
ADSS	adenylosuccinate synthase	428579	F1NE27; F1NS23; Q5ZJL5	NP_001026692	NM_001031521
ADSSL1	adenylosuccinate synthase like 1	776127	F1NVD4	XP_001235680	XM_001235679
AEBP2	AE binding protein 2	418184	F1NQ87	XP_416415	XM_416415
AEN	apoptosis enhancing nuclease	415496	E1C018	XP_413869	XM_413869
AFAP1	Actin filament associated protein 1	374034	E1C282; F1NTH4; Q90738	NP_001128120; NP_989536	NM_001134648; NM_204205
AFAP1L1	actin filament associated protein 1-like 1	427621	F1NG45; F1NNX5	XP_425193	XM_425193
AFAP1L2	actin filament associated protein 1-like 2	423908	---	XP_421770	XM_421770
AFF1	AF4/FMR2 family, member 1	422590	F1NMH4	XP_420549	XM_420549
AFF2	AF4/FMR2 family, member 2	422394	E1BWS6	XP_003641137	XM_003641089
AFF3	AF4/FMR2 family, member 3	418705	F1N9V5; F1P5G7	XP_001233772	XM_001233771
AFF4	AF4/FMR2 family, member 4	416337	E1C5W2	XP_414653	XM_414653
AFG3L2	AFG3 ATPase family gene 3-like 2 (S. cerevisiae)	421036	E1BZ74	XP_419121	XM_419121
AFMID	arylformamidase	769005	E1C2H6	XP_001231539; XP_001231576	XM_001231538; XM_001231575
AFP	alpha-fetoprotein	422652	E1BV96; E1C1G2	XP_003641248	XM_003641200
AFTPH	aftiphilin	421277	E1BRT1; F1NGD9	XP_419346	XM_419346
AGA	aspartylglucosaminidase	422558	F1NQI0; Q5ZJG0	NP_001006445	NM_001006445
AGAP1	ArfGAP with GTPase domain, ankyrin repeat and PH domain 1	424024	---	XP_421880	XM_421880
AGAP3	ArfGAP with GTPase domain, ankyrin repeat and PH domain 3	768507	---	XP_003640679	XM_003640631
AGBL1	ATP/GTP binding protein-like 1	427507	F1NES6	XP_425080	XM_425080
AGBL2	ATP/GTP binding protein-like 2	426630	F1NPE5	XP_424259	XM_424259
AGBL3	ATP/GTP binding protein-like 3	769745	F1NDJ1; F1NQ60	XP_001233037	XM_001233036
AGBL4	ATP/GTP binding protein-like 4	772083	---	XP_001235271	XM_001235270
AGBL5	ATP/GTP binding protein-like 5	---	E1BTZ2	---	---
AGFG1	ArfGAP with FG repeats 1	424793	F1NBV2	XP_422611	XM_422611
AGGF1	angiogenic factor with G patch and FHA domains 1	416364	F1NWU4	XP_414679	XM_414679
AGK	acylglycerol kinase	418121	E1BTF5; F1NJV7; Q5ZHK2	XP_416354	XM_416354
AGL	amylo-alpha-1, 6-glucosidase, 4-alpha-glucanotransferase	424474	F1NX83	XP_422317	XM_422317
AGMAT	agmatine ureohydrolase (agmatinase)	373942	E1C3T9; Q90XD2	NP_989474	NM_204143
AGMO	alkylglycerol monooxygenase	772374	F1NCC7; F1NM27	XP_001235521	XM_001235520
AGPAT1	1-acylglycerol-3-phosphate O-acyltransferase 1 (lysophosphatidic acid acyltransferase, alpha)	419941	F1NKP0	XP_418063	XM_418063
AGPAT2	1-acylglycerol-3-phosphate O-acyltransferase 2 (lysophosphatidic acid acyltransferase, beta)	772114	---	XP_001235300	XM_001235299
AGPAT3	1-acylglycerol-3-phosphate O-acyltransferase 3	418550	E1BYF3; H9L0B2	XP_416756	XM_416756
AGPAT4	1-acylglycerol-3-phosphate O-acyltransferase 4 (lysophosphatidic acid acyltransferase, delta)	421578	E1BY49	XP_419616	XM_419616
AGPAT5	1-acylglycerol-3-phosphate O-acyltransferase 5 (lysophosphatidic acid acyltransferase, epsilon)	421898	E1BSZ0	XP_419916	XM_419916
AGPAT6	1-acylglycerol-3-phosphate O-acyltransferase 6 (lysophosphatidic acid acyltransferase, zeta)	426788	---	XP_424400	XM_424400
AGPAT9	1-acylglycerol-3-phosphate O-acyltransferase 9	422610	F1NYF4; Q5ZLL8	NP_001026316	NM_001031145
AGPHD1	aminoglycoside phosphotransferase domain containing 1	415358	E1C5M4	XP_413743	XM_413743
AGPS	alkylglycerone phosphate synthase	424135	F1P5J7	XP_421987	XM_421987
AGR2	anterior gradient homolog 2 (Xenopus laevis)	420596	E1C937	XP_418698	XM_418698
AGR3	anterior gradient homolog 3 (Xenopus laevis)	420597	F1NLZ0	NP_001186542	NM_001199613
AGRN	agrin	396538	P31696	NP_990858	NM_205527
AGRP	agouti related protein homolog (mouse)	427535	C0A1C8; C0A1C9; C0A1D0; Q9W7R0	NP_001026628	NM_001031457
AGT	angiotensinogen (serpin peptidase inhibitor, clade A, member 8)	421543	F1NDH2	XP_419584	XM_419584
AGTPBP1	ATP/GTP binding protein 1	427460	E1C3P4	XP_001233247	XM_001233246
AGTR1	angiotensin II receptor, type 1	396065	P79785	NP_990488	NM_205157
AGTR2	angiotensin II receptor, type 2	428708	F1NC23	XP_426266	XM_426266
AGTRAP	angiotensin II receptor-associated protein	419491	E1BXK6	XP_417646	XM_417646
AGXT2	alanine--glyoxylate aminotransferase 2	431666	F1NQJ1	XP_429219	XM_429219
AGXT2L1	alanine-glyoxylate aminotransferase 2-like 1	428743	---	XP_426301	XM_426301
AGXT2L2	alanine-glyoxylate aminotransferase 2-like 2	416374	F1NIA8	XP_414688	XM_414688
AHCTF1	AT hook containing transcription factor 1	421484	---	NP_001155273	NM_001161801
AHCY	adenosylhomocysteinase	419146	---	XP_417331	XM_417331
AHCYL1	adenosylhomocysteinase-like 1	419803	F1NUT5; Q5F3Q3	NP_001026084	NM_001030913
AHI1	Abelson helper integration site 1	421693	---	XP_003641013	XM_003640965
AHNAK	AHNAK nucleoprotein	---	H9KYT6	---	---
AHNAK2	AHNAK nucleoprotein 2	423497	---	XP_421400	XM_421400
AHR	aryl hydrocarbon receptor	373907	F1NLX8; Q9I9E2; Q9PTI7	NP_989449	NM_204118
AHRR	aryl-hydrocarbon receptor repressor	420989	E5L8C8; F1NHD6	NP_001188316	NM_001201387
AHSA1	AHA1, activator of heat shock 90kDa protein ATPase homolog 1 (yeast)	423378	E1C123	XP_421292	XM_421292
AHSA2	AHA1, activator of heat shock 90kDa protein ATPase homolog 2 (yeast)	421194	E1BSW0	NP_001186347	NM_001199418
AHSG	alpha-2-HS-glycoprotein	424956	E1BZE1	XP_422764	XM_422764
AICDA	activation-induced cytidine deaminase	418257	E1BVI0	NP_001230151	NM_001243222
AIDA	axin interactor, dorsalization associated	421335	E1BRY9; E1BXY9	XP_419398	XM_419398
AIF1L	allograft inflammatory factor 1-like	417179	F1NDU3	XP_415461	XM_415461
AIFM1	Apoptosis-inducing factor, mitochondrion-associated, 1	428688	Q5F357; Q5ZHL7	NP_001007491	NM_001007490
AIFM2	apoptosis-inducing factor, mitochondrion-associated, 2	423720	E1BR24	XP_421597	XM_421597
AIFM3	apoptosis-inducing factor, mitochondrion-associated, 3	416999	E1C3V0	XP_003642264; XP_415290	XM_003642216; XM_415290
AIG1	androgen-induced 1	421671	E1BS86	XP_419710	XM_419710
AIM1	absent in melanoma 1	421783	F1NL87; F1NTF9	XP_419809	XM_419809
AIM1L	absent in melanoma 1-like	419544	---	XP_417695	XM_417695
AIMP1	aminoacyl tRNA synthetase complex-interacting multifunctional protein 1	422533	F1NLE7	XP_420496	XM_420496
AIMP2	aminoacyl tRNA synthetase complex-interacting multifunctional protein 2	769030	F1NSQ1	XP_001232213; XP_003642158	XM_001232212; XM_003642110
AIP	aryl hydrocarbon receptor interacting protein	395123	F1NME4; Q7T048	NP_989800	NM_204469
AIPL1	aryl hydrocarbon receptor interacting protein-like 1	769785	F1P218	XP_001233085	XM_001233084
AIRE	autoimmune regulator	429666	A8TG80	XP_427220	XM_427220
AK1	adenylate kinase 1	396002	P05081	NP_990440	NM_205109
AK2	Adenylate kinase 2	428227	---	XP_425786	XM_425786
AK3	adenylate kinase 3	426534	F1NH84	XP_424173	XM_424173
AK4	adenylate kinase 4	424697	F1NMJ2	XP_422526	XM_422526
AK5	Adenylate kinase 5	424555	E1BUE7	XP_422391	XM_422391
AK7	adenylate kinase 7	428907	F1NDU6	XP_426462	XM_426462
AK8	adenylate kinase 8	430522	---	XP_428077	XM_428077
AKAP1	A kinase (PRKA) anchor protein 1	417668	E1C1N8	XP_415913	XM_415913
AKAP10	A kinase (PRKA) anchor protein 10	417612	F1NHG4	XP_415856	XM_415856
AKAP11	A kinase (PRKA) anchor protein 11	418835	F1NXE9	XP_417031	XM_417031
AKAP12	A kinase (PRKA) anchor protein 12	421634	---	XP_419673	XM_419673
AKAP13	A kinase (PRKA) anchor protein 13	415502	---	XP_413874	XM_413874
AKAP14	A kinase (PRKA) anchor protein 14	772147	E1C4C3	XP_001234244	XM_001234243
AKAP17A	A kinase (PRKA) anchor protein 17A	418664	F1NFG4	NP_001182479	NM_001195550
AKAP2	A kinase (PRKA) anchor protein 2	100533110	E1C929	NP_001191146	NM_001204217
AKAP6	A kinase (PRKA) anchor protein 6	423314	---	XP_003641407	XM_003641359
AKAP7	A kinase (PRKA) anchor protein 7	426926	---	XP_424536	XM_424536
AKAP8	A kinase (PRKA) anchor protein 8	426167	---	XP_423831	XM_423831
AKAP8L	A kinase (PRKA) anchor protein 8-like	426166	H9L079	NP_001026537	NM_001031366
AKAP9	A kinase (PRKA) anchor protein (yotiao) 9	395695	F1P0N7; F1P2S8; Q9W6V0	NP_997062	NM_207179
AKD1	adenylate kinase domain containing 1	771077	F1NRW9	XP_003641084	XM_003641036
AKD1; AKD1	chromosome 6 open reading frame 199; adenylate kinase domain containing 1	771047; 771077	E1C747	XP_001234353; XP_003641084	XM_001234352; XM_003641036
AKIP1	A kinase (PRKA) interacting protein 1	423054	E1C507; F1NBC6	XP_420987	XM_420987
AKIRIN2	akirin 2	421821	E1C249; E2GI52	NP_001180524	NM_001193595
AKR1A1	aldo-keto reductase family 1, member A1 (aldehyde reductase)	424599	F1N9F8; F1NEA0; Q5ZK84	NP_001006539	NM_001006539
AKR1B10	aldo-keto reductase family 1, member B10 (aldose reductase)	418169	F1NT57	XP_416400	XM_416400
AKR1B1L	aldo-keto reductase family 1, member B1-like (aldose reductase)	418171	E1C1I6	NP_001230519	NM_001243590
AKR1D1	aldo-keto reductase family 1, member D1 (delta 4-3-ketosteroid-5-beta-reductase)	418107	E1BU27	XP_003640472; XP_416341	XM_003640424; XM_416341
AKR7A2	aldo-keto reductase family 7, member A2 (aflatoxin aldehyde reductase)	419471	F1P331	XP_417628	XM_417628
AKT1	v-akt murine thymoma viral oncogene homolog 1	395928	F1NMS0; O57513	NP_990386	NM_205055
AKT2	v-akt murine thymoma viral oncogene homolog 2	373973	Q9PUJ3	---	---
AKT3	v-akt murine thymoma viral oncogene homolog 3 (protein kinase B, gamma)	421497	F1NRC8	XP_419544	XM_419544
AKTIP	AKT interacting protein	415720	E1BW63; Q5ZJJ5	NP_001005838	NM_001005838
ALAD	aminolevulinate dehydratase	417274	F1NN39	XP_003642298	XM_003642250
ALAS1	aminolevulinate, delta-, synthase 1	552895	E1C3L6; E1C5T4; P07997	NP_001018012	NM_001018012
ALB	albumin	396197	F2Z4L6; P19121	NP_990592	NM_205261
ALC	ALC protein	395084	F1NDT7; Q7ZT08	NP_989771	NM_204440
ALCAM	activated leukocyte cell adhesion molecule	396092	F1NL79; P42292	NP_990510	NM_205179
ALDH18A1	aldehyde dehydrogenase 18 family, member A1	423976	E1C8Q3	XP_003641582	XM_003641534
ALDH1A1	aldehyde dehydrogenase 1 family, member A1	395264	F1NJC7; F1NJP8; P27463	NP_989908	NM_204577
ALDH1A2	aldehyde dehydrogenase 1 family, member A2	395844	F1NIE7; O93344	NP_990326	NM_204995
ALDH1A3	aldehyde dehydrogenase 1 family, member A3	395389	Q9DD46	NP_990000	NM_204669
ALDH1L2	aldehyde dehydrogenase 1 family, member L2	418078	F1P130	XP_416314	XM_416314
ALDH2	aldehyde dehydrogenase 2 family (mitochondrial)	416880	E1BT93	XP_003642229; XP_415171	XM_003642181; XM_415171
ALDH3A2	aldehyde dehydrogenase 3 family, member A2	417615	F1NH33; Q5ZLE2	NP_001006223	NM_001006223
ALDH3B1; LOC428812	aldehyde dehydrogenase 3 family, member B1; aldehyde dehydrogenase family 3 member B1-like	428812; 428813	E1C078	XP_003641325; XP_426371	XM_003641277; XM_426371
ALDH4A1	aldehyde dehydrogenase 4 family, member A1	419467	E1C8Z8	NP_001239033	NM_001252104
ALDH5A1	aldehyde dehydrogenase 5 family, member A1	420818	E1BRI3	XP_418909	XM_418909
ALDH6A1	aldehyde dehydrogenase 6 family, member A1	423345	E1C155	XP_421260	XM_421260
ALDH7A1	aldehyde dehydrogenase 7 family, member A1	426812	E1C4W4	XP_003643154; XP_424422	XM_003643106; XM_424422
ALDH8A1	aldehyde dehydrogenase 8 family, member A1	421695	F1P4K4	XP_001232914; XP_003640971; XP_419732	XM_001232913; XM_003640923; XM_419732
ALDH9A1	aldehyde dehydrogenase 9 family, member A1	424405	F1NMN7	XP_422248	XM_422248
ALDOB	aldolase B, fructose-bisphosphate	427308	F1NTZ3; P07341	NP_001007978	NM_001007977
ALDOC	aldolase C, fructose-bisphosphate	395492	P53449	NP_001193425	NM_001206496
ALG1	asparagine-linked glycosylation 1, beta-1,4-mannosyltransferase homolog (S. cerevisiae)	416393	E1BRK4	XP_414707	XM_414707
ALG10	asparagine-linked glycosylation 10, alpha-1,2-glucosyltransferase homolog (S. pombe)	426734	Q5ZKB3	NP_001026565	NM_001031394
ALG11	Asparagine-linked glycosylation 11, alpha-1,2-mannosyltransferase homolog (yeast)	418880	E1BUY5	NP_001186754	NM_001199825
ALG12	Asparagine-linked glycosylation 12, alpha-1,6-mannosyltransferase homolog (S. cerevisiae)	417733	Q5ZMJ2	NP_001034359	NM_001039270
ALG13	asparagine-linked glycosylation 13 homolog (S. cerevisiae)	422339	E1C3M6; E1C3P1; F1NRT1	XP_420312	XM_420312
ALG14	asparagine-linked glycosylation 14 homolog (S. cerevisiae)	424484	E1C1M5	XP_430156	XM_430156
ALG2	asparagine-linked glycosylation 2, alpha-1,3-mannosyltransferase homolog (S. cerevisiae)	420998	---	XP_003640838	XM_003640790
ALG3	asparagine-linked glycosylation 3, alpha-1,3- mannosyltransferase homolog (S. cerevisiae)	424952	---	XP_422759	XM_422759
ALG5	asparagine-linked glycosylation 5, dolichyl-phosphate beta-glucosyltransferase homolog (S. cerevisiae)	418898	E1BUU9; E1C0Y4; E1C2H8	XP_417093	XM_417093
ALG6	asparagine-linked glycosylation 6, alpha-1,3-glucosyltransferase homolog (S. cerevisiae)	395078	E1BS26; F1NED3; Q802T2	NP_989766	NM_204435
ALG8	asparagine-linked glycosylation 8, alpha-1,3-glucosyltransferase homolog (S. cerevisiae)	428097	F1NPY2	XP_425656	XM_425656
ALG9	asparagine-linked glycosylation 9, alpha-1,2-mannosyltransferase homolog (S. cerevisiae)	428255	---	XP_425814	XM_425814
ALK	anaplastic lymphoma receptor tyrosine kinase	421297	F1NHS4; F1NHS5	XP_419364	XM_419364
ALKBH1	alkB, alkylation repair homolog 1 (E. coli)	428898	Q5F3E4	NP_001026723	NM_001031552
ALKBH2	alkB, alkylation repair homolog 2 (E. coli)	416897	E1C3F7	XP_003642231	XM_003642183
ALKBH3	alkB, alkylation repair homolog 3 (E. coli)	423169	---	XP_421095	XM_421095
ALKBH4	alkB, alkylation repair homolog 4 (E. coli)	417510	---	XP_415758	XM_415758
ALKBH5	AlkB, alkylation repair homolog 5 (E. coli)	770703	F1NIA5	XP_001233463; XP_414818	XM_001233462; XM_414818
ALKBH8	alkB, alkylation repair homolog 8 (E. coli)	418972	F1P0F6	XP_417166	XM_417166
ALMS1	uncharacterized LOC422949	422949	---	XP_420887	XM_420887
ALOX5	arachidonate 5-lipoxygenase	423769	F1NB65	XP_003641560	XM_003641512
ALOX5AP	arachidonate 5-lipoxygenase-activating protein	770904	E1BT06	XP_001233119	XM_001233118
ALOXE3	arachidonate lipoxygenase 3	425997	H9L001	XP_423676	XM_423676
ALPI	alkaline phosphatase, intestinal	424936	F1NZG4	XP_422743	XM_422743
ALPK1	alpha-kinase 1	100858173	E1BQC3	XP_003641313	XM_003641265
ALPK2	alpha-kinase 2	426853	F1NBZ0	XP_424461	XM_424461
ALPK3; LOC100859651	alpha-kinase 3; alpha-protein kinase 3-like	100859651; 768936	F1P5T4	XP_003641857; XP_413723	XM_003641809; XM_413723
ALPL	alkaline phosphatase, liver/bone/kidney	396317	F1NN44; Q92058	NP_990691	NM_205360
ALS2	amyotrophic lateral sclerosis 2 (juvenile)	424085	E1BX75	XP_421940	XM_421940
ALS2CL	ALS2 C-terminal like	428401	E1BR75; E1C6G1	XP_003640695	XM_003640647
ALS2CR8	amyotrophic lateral sclerosis 2 (juvenile) chromosome region, candidate 8	424090	E1BUN4; F1NVN9	XP_421946	XM_421946
ALX1	ALX homeobox 1	427871	F1NC94	XP_425445	XM_425445
ALX4	ALX homeobox 4	373976	O93582	NP_989493	NM_204162
AMACR	alpha-methylacyl-CoA racemase	427429	F1NKY1; F1NKY3; F1NUZ1; Q5ZL63	NP_001026619	NM_001031448
AMBP	alpha-1-microglobulin/bikunin precursor	770795	F1NUF8	XP_001234121	XM_001234120
AMBRA1	autophagy/beclin-1 regulator 1	423194	E1BQ96; E1BZ45; F1NX05; Q5F455	XP_001233289	NM_001012584; XM_001233288
AMD1	adenosylmethionine decarboxylase 1	421755	Q5F484	NP_001012587	NM_001012569
AMDHD1	amidohydrolase domain containing 1	417917	F1P298	XP_416158	XM_416158
AMDHD2	amidohydrolase domain containing 2	770465	F1P5J8	XP_001232228; XP_001232246	XM_001232227; XM_001232245
AMFR	autocrine motility factor receptor	415697	---	XP_414064	XM_414064
AMH	anti-Mullerian hormone	395887	E1BWH3; G8BLH3; Q788U7; Q90974	NP_990361	NM_205030
AMH; SF3A2	anti-Mullerian hormone; splicing factor 3a, subunit 2, 66kDa	395887; 420077	E1BWH3; F1NDF9; F1NUL0; F1NUL1; G8BLH3; Q66VY4; Q788U7	NP_001004397; NP_990361	NM_001004397; NM_205030
AMIGO2	adhesion molecule with Ig-like domain 2	417810	E1C7K9	NP_001186479	NM_001199550
AMMECR1	Alport syndrome, mental retardation, midface hypoplasia and elliptocytosis chromosomal region gene 1	422343	E1C1I5	XP_001234035	XM_001234034
AMMECR1L	AMME chromosomal region gene 1-like	424755	F1P0P5	XP_422577	XM_422577
AMN	Amnionless homolog (mouse)	423472	F1P4E3	XP_421379	XM_421379
AMN1	antagonist of mitotic exit network 1 homolog (S. cerevisiae)	418137	---	XP_003640446; XP_416368	XM_003640398; XM_416368
AMOT	angiomotin	422336	E1C5Z2	XP_420309	XM_420309
AMOTL1	angiomotin like 1	428091	F1NYL2	XP_425649	XM_425649
AMOTL2	angiomotin like 2	424863	---	XP_422675	XM_422675
AMPD1	adenosine monophosphate deaminase 1 (isoform M)	772125	F1P0N2	XP_003642776	XM_003642728
AMPD3	adenosine monophosphate deaminase 3	423041	F1NG97	NP_001186517	NM_001199588
AMPH	amphiphysin	420761	F1NBU6; F1NZ03; P50478	NP_001004398	NM_001004398
AMT	aminomethyltransferase	395566	P28337	NP_990119	NM_204788
AMY1A	Amylase, alpha 1A; salivary	414139	F1NW02	NP_001001528	NM_001001528
AMY2A	amylase, alpha 2A; pancreatic	414140	F1NF53	NP_001001473	NM_001001473
AMZ1	archaelysin family metallopeptidase 1	416474	---	XP_414779	XM_414779
ANAPC1	anaphase promoting complex subunit 1	421228	E1C2U7	XP_419303	XM_419303
ANAPC10	anaphase promoting complex subunit 10	422461	Q5ZL04	NP_001008467	NM_001008467
ANAPC16	anaphase promoting complex subunit 16	423708	E1BVD8	XP_421587	XM_421587
ANAPC2	anaphase promoting complex subunit 2	417258	F1NLT0	XP_415533	XM_415533
ANAPC4	Anaphase promoting complex subunit 4	422805	Q5ZJ92	XP_001231777	NM_001031156; XM_001231776
ANAPC5	anaphase promoting complex subunit 5	416842	F1NK93; F1P2A0; Q5ZKK3	NP_001006187	NM_001006187
ANAPC7	anaphase promoting complex subunit 7	416838	E1C8I2	XP_415129	XM_415129
ANG; RSFR	angiogenin, ribonuclease, RNase A family, 5; leukocyte ribonuclease A-2	396194; 423668	P27043; P30374; Q27J90; Q27J91	NP_001007943; NP_990590	NM_001007942; NM_205259
ANGEL1	Angel homolog 1 (Drosophila)	423370	F1NB31; F1NB32; Q5ZJC6	NP_001026376	NM_001031205
ANGEL2	angel homolog 2 (Drosophila)	421363	F1P557; Q5ZM21	NP_001026218	NM_001031047
ANGPT1	angiopoietin 1	395129	F1P080; Q70UN6	NP_001186376	NM_001199447
ANGPT2	angiopoietin 2	395610	Q9DER0; Q9DER2; Q9PU54	NP_990148	NM_204817
ANGPTL1	angiopoietin-like 1	770850	E1BYT9	XP_001233150	XM_001233149
ANGPTL2	angiopoietin-like 2	776031	F1NE57	XP_001234680	XM_001234679
ANGPTL3	Angiopoietin-like 3	100189558	B1B565; E1BS40; F1NPL7	NP_001128594	NM_001135122
ANGPTL4	angiopoietin-like 4	769087	F1NUQ4	XP_001232284	XM_001232283
ANGPTL5	angiopoietin-like 5	772036	E1C2K8; F1NZ47	NP_001184165	NM_001197236
ANGPTL6	angiopoietin-like 6	417458	---	XP_415706	XM_415706
ANGPTL7	angiopoietin-like 7	428662	F1NGL3	XP_426220	XM_426220
ANK1	ankyrin 1, erythrocytic	396311	F1NJR5; Q90715	XP_424401	XM_424401
ANK2	ankyrin 2, neuronal	422689	---	XP_420641	XM_420641
ANK3	ankyrin 3, node of Ranvier (ankyrin G)	396309	---	XP_421546	XM_421546
ANKDD1A	ankyrin repeat and death domain containing 1A	415525	E1C118	XP_413894	XM_413894
ANKDD1B	ankyrin repeat and death domain containing 1B	431596	F1NRI1	XP_429150	XM_429150
ANKFN1	ankyrin-repeat and fibronectin type III domain containing 1	427807	F1NBB8; F1NL29; F1NL41	XP_425378	XM_425378
ANKFY1	Ankyrin repeat and FYVE domain containing 1	417494	F1NSB6	XP_415742	XM_415742
ANKH	ankylosis, progressive homolog (mouse)	420917	F1N8B9; F1NNA3; Q5EEJ9	NP_001012580	NM_001012562
ANKHD1	ankyrin repeat and KH domain containing 1	416143	E1BXT7	NP_001191026	NM_001204097
ANKIB1	ankyrin repeat and IBR domain containing 1	420550	F1P038	XP_418652	XM_418652
ANKLE2	ankyrin repeat and LEM domain containing 2	416790	---	XP_415084	XM_415084
ANKMY1	ankyrin repeat and MYND domain containing 1	417300	---	XP_415573	XM_415573
ANKMY2	ankyrin repeat and MYND domain containing 2	420593	F1NM13; Q5ZMD2	NP_001026150	NM_001030979
ANKRA2	ankyrin repeat, family A (RFXANK-like), 2	426153	Q5ZIC2	NP_001006565	NM_001006565
ANKRD1	ankyrin repeat domain 1 (cardiac muscle)	378926	F1NYV8; Q7ZT11	NP_989736	NM_204405
ANKRD10	ankyrin repeat domain 10	418760	F1P276; G1K354; Q5ZLC6	NP_001025986	NM_001030815
ANKRD11	Ankyrin repeat domain 11	415845	---	XP_414205	XM_414205
ANKRD12	ankyrin repeat domain 12	425900	E1BXQ1	XP_423591	XM_423591
ANKRD13A	ankyrin repeat domain 13A	416902	F1P4K0	XP_415193	XM_415193
ANKRD13B	ankyrin repeat domain 13B	100859164	---	XP_003642479	XM_003642431
ANKRD13C	ankyrin repeat domain 13C	424715	---	XP_430177	XM_430177
ANKRD16	ankyrin repeat domain 16	416688	E1C7B6	NP_001186243	NM_001199314
ANKRD2	ankyrin repeat domain 2 (stretch responsive muscle)	423841	E1C1Q6	XP_421709	XM_421709
ANKRD22	ankyrin repeat domain 22	771419	E1BWW1	XP_001234693	XM_001234692
ANKRD24	ankyrin repeat domain 24	428331	F1P0S4	XP_425891	XM_425891
ANKRD26	ankyrin repeat domain 26	417764	---	XP_416008	XM_416008
ANKRD27	ankyrin repeat domain 27 (VPS9 domain)	415766	F1NGS0	NP_001129150	NM_001135678
ANKRD28	ankyrin repeat domain 28	420640	---	XP_418739	XM_418739
ANKRD29	ankyrin repeat domain 29	428523	F1NS65; F1NTK5; F1NTK7	XP_426077	XM_426077
ANKRD31	ankyrin repeat domain 31	427208	F1NTL9	XP_424795	XM_424795
ANKRD32	ankyrin repeat domain 32	427111	E1C580	XP_424703	XM_424703
ANKRD33B	ankyrin repeat domain 33B	420924	F1NJQ5	XP_419009	XM_419009
ANKRD34B	ankyrin repeat domain 34B	431626	H9L0P2	XP_429178	XM_429178
ANKRD34C	ankyrin repeat domain 34C	415579	E1C260	XP_413947	XM_413947
ANKRD40	ankyrin repeat domain 40	428678	F1NA01; Q5ZK80	NP_001026702	NM_001031531
ANKRD42	ankyrin repeat domain 42	772327	F1NVU9	XP_001235479	XM_001235478
ANKRD43	ankyrin repeat domain 43	416334	---	XP_003643234	XM_003643186
ANKRD44	ankyrin repeat domain 44	424055	F1NRR2; F1NRR3; Q5F478	NP_001012933	NM_001012915
ANKRD46	ankyrin repeat domain 46	426304	E1C8A5	XP_003640890; XP_423967	XM_003640842; XM_423967
ANKRD47	ankyrin repeat domain 47	428321	E1BVV2; E1C6L1	XP_425881	XM_425881
ANKRD49	ankyrin repeat domain 49	418997	E1C2K9	XP_003640639; XP_417191	XM_003640591; XM_417191
ANKRD50	ankyrin repeat domain 50	422663	---	XP_420618	XM_420618
ANKRD52	ankyrin repeat domain 52	426469	H9L0G9; Q5ZLC8	NP_001012957	NM_001012939
ANKRD54	Ankyrin repeat domain 54	418034	---	XP_416271	XM_416271
ANKRD6	ankyrin repeat domain 6	421813	E1C4S8	XP_003641064; XP_003641065; XP_003641066; XP_419837	XM_003641016; XM_003641017; XM_003641018; XM_419837
ANKRD60	ankyrin repeat domain 60	419320	E1C7Y9	XP_417492	XM_417492
ANKRD9	ankyrin repeat domain 9	423469	---	XP_421377	XM_421377
ANKS1A	ankyrin repeat and sterile alpha motif domain containing 1A	419898	E1BR62; E1C898	XP_418023	XM_418023
ANKS1B	ankyrin repeat and sterile alpha motif domain containing 1B	417927	---	NP_001238991	NM_001252062
ANKS3	ankyrin repeat and sterile alpha motif domain containing 3	769431	---	XP_001231827	XM_001231826
ANKS4B	ankyrin repeat and sterile alpha motif domain containing 4B	427007	E1C7N0	XP_424609	XM_424609
ANKS6	ankyrin repeat and sterile alpha motif domain containing 6	420977	E1BQM0	XP_419064	XM_419064
ANKZF1	ankyrin repeat and zinc finger domain containing 1	429038	F1NVQ2; F1NZR1; Q5ZHK4	XP_001232760	NM_001031558; XM_001232759
ANLN	Anillin, actin binding protein	420738	---	XP_418836	XM_418836
ANO1	anoctamin 1, calcium activated chloride channel	423144	---	XP_421072	XM_421072
ANO10	anoctamin 10	420674	F1NZ28	XP_418773	XM_418773
ANO2	anoctamin 2	428100	E1C6Z1	---	XR_140002
ANO3	anoctamin 3	422968	E1BVP3	NP_001186394; NP_001186396	NM_001199465; NM_001199467
ANO4	anoctamin 4	427878	F1NVE6	XP_425452	XM_425452
ANO6	anoctamin 6	417802	F1P0I9	XP_416045	XM_416045
ANO8	anoctamin 8	429912	---	XP_427467	XM_427467
ANO9	Anoctamin 9	422996	---	---	XR_140131
ANP32A	acidic (leucine-rich) nuclear phosphoprotein 32 family, member A	415562	E1C2A1	XP_413932	XM_413932
ANP32B	acidic (leucine-rich) nuclear phosphoprotein 32 family, member B	420087	A3RL83; Q5ZMN0	NP_001026105	NM_001030934
ANP32E	Acidic (leucine-rich) nuclear phosphoprotein 32 family, member E	426109	H9L047; H9L3Q3; H9L3Q4; Q5F4A3; Q5ZJD6	NP_001006564	NM_001006564
ANPEP	alanyl (membrane) aminopeptidase (aminopeptidase N, aminopeptidase M, microsomal aminopeptidase, CD13, p150)	395667	H9KZA9; O57579	NP_990192	NM_204861
ANTXR1	anthrax toxin receptor 1	428199	E1C2J0	XP_425758	XM_425758
ANTXR2	anthrax toxin receptor 2	422580	E1C761	XP_420539	XM_420539
ANTXRL	anthrax toxin receptor-like	423775	F1NBH1	XP_421647	XM_421647
ANUBL1	AN1, ubiquitin-like, homolog (Xenopus laevis)	423771	---	XP_003641561	XM_003641513
ANXA1	annexin A1	404271	E1C344; F1N9S7; Q6QAZ9; Q92108	NP_996789	NM_206906
ANXA10	annexin A10	770326	F1P2N4	XP_001233662	XM_001233661
ANXA11	annexin A11	423637	F1NLR0; Q5ZLG6	NP_001012921	NM_001012903
ANXA13	annexin A13	420342	F1NNR3	NP_001186430	NM_001199501
ANXA2	Annexin A2	396297	P17785	NP_990682	NM_205351
ANXA5	annexin A5	428767	F1NJI0; P17153	NP_001026709	NM_001031538
ANXA6	annexin A6	395481	E1BWX1; F1NVG9; P51901; Q6B344	NP_990061	NM_204730
ANXA7	annexin A7	423747	E1C1D1	XP_421623	XM_421623
ANXA8	annexin A8	423774	E1C8K3	XP_421646	XM_421646
AOAH	acyloxyacyl hydrolase (neutrophil)	420737	F1NF94	XP_418835	XM_418835
AOC3; PSME3	amine oxidase, copper containing 3 (vascular adhesion protein 1); proteasome (prosome, macropain) activator subunit 3 (PA28 gamma; Ki)	420015; 420017	E1BZU7; Q5F3J5	NP_001012568; XP_003642864; XP_418136	NM_001012550; XM_003642816; XM_418136
AOX1	aldehyde oxidase 1	424071	F1NE68; Q2QB50	NP_001033781	NM_001038692
AOX2P	aldehyde oxidase 2 pseudogene	424072	E1C5E9; F1NE67; Q2QB49	NP_001034690	NM_001039601
AP1AR	adaptor-related protein complex 1 associated regulatory protein	422693	F1NFB7	XP_003641282; XP_420646	XM_003641234; XM_420646
AP1B1	adaptor-related protein complex 1, beta 1 subunit	417021	---	XP_415311	XM_415311
AP1G1	Adaptor-related protein complex 1, gamma 1 subunit	415880	F1NDA9; Q5ZJ83	NP_001006132	NM_001006132
AP1M1	adaptor-related protein complex 1, mu 1 subunit	420149	F1NZQ2; Q5ZMG7	NP_001007887	NM_001007886
AP1S2	adaptor-related protein complex 1, sigma 2 subunit	418621	F1NHS7; F1NHS8; Q5ZJX2; Q5ZKL8	NP_001006261	NM_001006261
AP1S3	adaptor-related protein complex 1, sigma 3 subunit	424807	E1BWN8	NP_001025179	NM_001030008
AP2A2	adaptor-related protein complex 2, alpha 2 subunit	423102	E1C866; F1NQB3; Q5F3T4	NP_001012914	NM_001012896
AP2B1	Adaptor-related protein complex 2, beta 1 subunit	417525	E1BXC1; E1BY12	XP_415772	XM_415772
AP2M1	adaptor-related protein complex 2, mu 1 subunit	770246	Q5ZMP6	NP_001072962	NM_001079494
AP3B1	adaptor-related protein complex 3, beta 1 subunit	427646	E1BW97	XP_003643003	XM_003642955
AP3B2	adaptor-related protein complex 3, beta 2 subunit	769343	F1NY63	XP_001232605	XM_001232604
AP3D1	adaptor-related protein complex 3, delta 1 subunit	420079	E1BWK3	XP_003642902	XM_003642854
AP3M1	adaptor-related protein complex 3, mu 1 subunit	423736	F1NZC2; Q5ZMP7	NP_001026398	NM_001031227
AP3M2	adaptor-related protein complex 3, mu 2 subunit	426790	E1C4U4	XP_424403	XM_424403
AP3S1	adaptor-related protein complex 3, sigma 1 subunit	427389	F1NKK0; F1P151; Q5ZJE2	NP_001006586	NM_001006586
AP3S2	Adaptor-related protein complex 3, sigma 2 subunit	415581	---	NP_001152814	NM_001159342
AP4B1	adaptor-related protein complex 4, beta 1 subunit	419879	F1NLK7; F1NY20; Q5ZJB3	NP_001026088	NM_001030917
AP4E1	adaptor-related protein complex 4, epsilon 1 subunit	415425	---	XP_413808	XM_413808
AP4M1	adaptor-related protein complex 4, mu 1 subunit	396046	H9L1K8; O12969	NP_990472; XP_001236843	NM_205141; XM_001236842
APAF1	apoptotic peptidase activating factor 1	417926	---	XP_001232225; XP_001232245; XP_001232266; XP_416167	XM_001232224; XM_001232244; XM_001232265; XM_416167
APBA1	amyloid beta (A4) precursor protein-binding, family A, member 1	427246	E1C7H3	XP_424829	XM_424829
APBA2	amyloid beta (A4) precursor protein-binding, family A, member 2	415386	F1NYK4	XP_413771	XM_413771
APBA3	amyloid beta (A4) precursor protein-binding, family A, member 3	420069	F1N9C3	XP_418188	XM_418188
APBB1IP	amyloid beta (A4) precursor protein-binding, family B, member 1 interacting protein	420492	E1BZU4; F1P5P3; F1P5P4; Q5ZL23	NP_001006357	NM_001006357
APBB2	amyloid beta (A4) precursor protein-binding, family B, member 2	422781	F1NIT3; F1NIT4; F1NND3	XP_420735	XM_420735
APBB3	amyloid beta (A4) precursor protein-binding, family B, member 3	427608	F1NVK0	XP_425180	XM_425180
APC	Adenomatous polyposis coli	415607	Q4A1V5	XP_001233411	XM_001233410
APC2	Adenomatosis polyposis coli 2	429363	D2W6W9	NP_001165242	NM_001171771
APCDD1	adenomatosis polyposis coli down-regulated 1	426765	Q5R2I8	NP_001012959	NM_001012941
APCDD1L	adenomatosis polyposis coli down-regulated 1-like	419316	F1NSX1; Q4R1K1	XP_417488	XM_417488
APEH	N-acylaminoacyl-peptide hydrolase	415926	Q5ZJB6	NP_001025756	NM_001030585
APEX1	APEX nuclease (multifunctional DNA repair enzyme) 1	100431102	---	NP_001171688	NM_001184759
APH1A	anterior pharynx defective 1 homolog A (C. elegans)	769986	---	XP_001233302	XM_001233301
API5	apoptosis inhibitor 5	423168	E1BSD9; F1NRW3; F1NRW4; F1P093; F1P094; F1P097; Q5ZMW3	NP_001006474	NM_001006474
API5; PDHX	apoptosis inhibitor 5; pyruvate dehydrogenase complex, component X	423154; 423168	E1BSD9; F1NRW3; F1NRW4; F1P093; F1P094; F1P097; H9KZH7; Q5F3G9; Q5ZMW3	NP_001006474; NP_001026358	NM_001006474; NM_001031187
APIP	APAF1 interacting protein	428860	F1NNC9; Q5ZLP2	NP_001026718	NM_001031547
APITD1	apoptosis-inducing, TAF9-like domain 1	771417	E1BSW7	NP_001191861	NM_001204932
APLF	aprataxin and PNKP like factor	421264	E1BTU6; E1BU46	XP_419335	XM_419335
APLP2	amyloid beta (A4) precursor-like protein 2	419727	F1P0A7; F1P0A9; Q5ZI18; Q5ZMI6	NP_001006317	NM_001006317
APLP2; NFRKB	amyloid beta (A4) precursor-like protein 2; nuclear factor related to kappaB binding protein	419727; 419730	E1BZI6; F1NNX4; F1P0A7; F1P0A9; Q5ZMI6	NP_001006317; NP_001185485	NM_001006317; NM_001198556
APOA1	apolipoprotein A-I	396536	F1N8F3; P08250	NP_990856	NM_205525
APOA1BP	apolipoprotein A-I binding protein	426569	---	XP_424208	XM_424208
APOA5	apolipoprotein A-V	419802	---	XP_417939	XM_417939
APOB	apolipoprotein B (including Ag(x) antigen)	396535	P11682; Q197X2	NP_001038098	NM_001044633
APOBEC2	apolipoprotein B mRNA editing enzyme, catalytic polypeptide-like 2	419915	F1NNK5	XP_418038	XM_418038
APOD	apolipoprotein D	424893	Q5G8Y9	NP_001011692	NM_001011692
APOH	apolipoprotein H (beta-2-glycoprotein I)	417431	E1BSE0; F1NYG4	XP_415683	XM_415683
APOLD1	apolipoprotein L domain containing 1	769889	F1NME0	XP_003640426	XM_003640378
APOO	apolipoprotein O	418599	F1NNV7	XP_416798	XM_416798
APOOL	apolipoprotein O-like	422271	F1NH92; Q5ZK55	NP_001006434	NM_001006434
APOVLDLII	lipoprotein	396476	P02659	NP_990814	NM_205483
APP	amyloid beta (A4) precursor protein	374198	E1C440; F1NDE5; F1NTQ5; F1NTQ6; F1NTQ7; F1P0B2; O93296; Q9DGJ7; Q9DGJ8; Q9PVL1	NP_989639	NM_204308
APPBP2	amyloid beta precursor protein (cytoplasmic tail) binding protein 2	417645	Q5ZLJ2	NP_001025894	NM_001030723
APPL1	adaptor protein, phosphotyrosine interaction, PH domain and leucine zipper containing 1	416002	E1C411	XP_414344	XM_414344
APPL2	adaptor protein, phosphotyrosine interaction, PH domain and leucine zipper containing 2	418075	E1BRI2	XP_416311	XM_416311
APTX	aprataxin	395173	F1NFX5; F1P5K8; P61798	XP_429199	XM_429199
AQP1	aquaporin 1 (Colton blood group)	420384	Q2MCJ7	NP_001034542	NM_001039453
AQP11	aquaporin 11	426725	F1NLJ9	XP_003640646; XP_424343	XM_003640598; XM_424343
AQP12	aquaporin 12	424861	E1BS80	NP_001103149	NM_001034839; NM_001109679
AQP2	aquaporin 2 (collecting duct)	431304	A7M7C5; H9KZP9	XP_428855	XM_428855
AQP3	aquaporin 3 (Gill blood group)	426894	A7M7C6; F1NWH5	XP_424500	XM_424500
AQP4	aquaporin 4	421088	F1NJZ6; Q65YQ3; Q683N1	NP_001004765	NM_001004765
AQP5	aquaporin 5	431305	Q683N0	XP_001231781	XM_001231780
AQP7	aquaporin 7	426892	A7VMS0; F1NWH6	XP_424498	XM_424498
AQP8	aquaporin 8	416566	F1NA56	XP_414866	XM_414866
AQP9	aquaporin 9	415402	A7VMS1; F1NK92; F1NZ32	XP_001233182; XP_413787	XM_001233181; XM_413787
AQR	aquarius homolog (mouse)	423296	F1NPB8	XP_421216	XM_421216
AR	androgen receptor	422165	F1NK66; Q2ACE0	NP_001035179	NM_001040090
ARAP2	ArfGAP with RhoGAP domain, ankyrin repeat and PH domain 2	428790	E1BTK2	XP_426346	XM_426346
ARAP3	ArfGAP with RhoGAP domain, ankyrin repeat and PH domain 3	416196	---	XP_414522	XM_414522
ARBP	attachment region binding protein	395523	O42403	---	---
ARC	activity-regulated cytoskeleton-associated protein	395075	Q8AWC3	NP_989763	NM_204432
ARCN1	Archain 1	770561	Q5ZL57	NP_001072967	NM_001079499
AREGB	amphiregulin B	428752	Q645M5	NP_001026708	NM_001031537
ARF1	ADP-ribosylation factor 1	420398	F1NN08; Q5ZMA0	NP_001006352	NM_001006352
ARF4	ADP-ribosylation factor 4	769725	F1NGS7; Q5ZKR9	XP_001232784	XM_001232783
ARF5	ADP-ribosylation factor 5	396265	P49702	NP_990656	NM_205325
ARF6	ADP-ribosylation factor 6	428927	P26990	NP_001075174; XP_426481	NM_001081705; XM_426481
ARFGAP1	ADP-ribosylation factor GTPase activating protein 1	419241	F1N8K3; Q5F3T0	NP_001026028	NM_001030857
ARFGAP2	ADP-ribosylation factor GTPase activating protein 2	423187	F1P3V2	NP_001029043	NM_001033871
ARFGAP3	ADP-ribosylation factor GTPase activating protein 3	418224	E1C322; F1NZX4; Q5F391	NP_001012557	NM_001012539
ARFGEF1	ADP-ribosylation factor guanine nucleotide-exchange factor 1(brefeldin A-inhibited)	420170	---	XP_418283	XM_418283
ARFGEF2	ADP-ribosylation factor guanine nucleotide-exchange factor 2 (brefeldin A-inhibited)	419211	E1BVQ3	XP_417388	XM_417388
ARFIP1	ADP-ribosylation factor interacting protein 1	770884	E1C4L7; Q5ZJF2	NP_001239327	NM_001252398
ARFRP1	ADP-ribosylation factor related protein 1	419261	E1C1J0	XP_417433	XM_417433
ARG2	Arginase, type II	423272	F1P5B4	NP_001186633	NM_001199704
ARGLU1	Arginine and glutamate rich 1	418765	Q5ZL35	NP_001006267	NM_001006267
ARHGAP1	Rho GTPase activating protein 1	428865	F1NXU7	XP_426422	XM_426422
ARHGAP10	Rho GTPase activating protein 10	422471	E1C877	XP_001232915; XP_420436	XM_001232914; XM_420436
ARHGAP11A	Rho GTPase activating protein 11A	423289	A1KXK7	NP_001006479	NM_001006479
ARHGAP12	Rho GTPase activating protein 12	420473	F1NB60	XP_418575	XM_418575
ARHGAP15	Rho GTPase activating protein 15	424303	E1C0U4; Q5ZMM3	NP_001008476	NM_001008476
ARHGAP17	Rho GTPase activating protein 17	416564	E1C2R7; E1C8J2	XP_414864	XM_414864
ARHGAP18	Rho GTPase activating protein 18	421706	F1P421	XP_419743	XM_419743
ARHGAP19	Rho GTPase activating protein 19	423846	F1P3Y3; Q5F3G0	NP_001012927	NM_001012909
ARHGAP20	Rho GTPase activating protein 20	418962	E1C0R6	XP_417154	XM_417154
ARHGAP21	Rho GTPase activating protein 21	420500	F1NS04	NP_001170828	NM_001177357
ARHGAP22	Rho GTPase activating protein 22	423779	E1BSC7; E1BSK8; F1NE22; F1NE31	XP_421651	XM_421651
ARHGAP24	Rho GTPase activating protein 24	422593	E1C6N8	XP_420552	XM_420552
ARHGAP25	Rho GTPase activating protein 25	419516	Q5ZJ53	NP_001026054	NM_001030883
ARHGAP26	Rho GTPase activating protein 26	396113	F1NA59; F1P4Q7; F1P4Q9; Q5ZMW5	NP_990525	NM_205194
ARHGAP28	Rho GTPase activating protein 28	421053	---	XP_419140	XM_419140
ARHGAP29	Rho GTPase activating protein 29	424488	E1C9D4	NP_001231811	NM_001244882
ARHGAP31	Rho GTPase activating protein 31	418344	F1NQ30	XP_416566	XM_416566
ARHGAP32	Rho GTPase activating protein 32	419724	---	XP_417865	XM_417865
ARHGAP35	Rho GTPase activating protein 35	425730	H9KZU2	XP_003643808	XM_003643760
ARHGAP39	Rho GTPase activating protein 39	419132	F1NPG6	XP_417317	XM_417317
ARHGAP40	Rho GTPase activating protein 40	419168	E1BV00; E1C7T5	NP_001138488	NM_001145016
ARHGAP42	Rho GTPase activating protein 42	418990	---	XP_417185	XM_417185
ARHGAP44	Rho GTPase activating protein 44	427797	F1NYA5	XP_425368	XM_425368
ARHGAP5	Rho GTPase activating protein 5	428883	F1NG56	XP_426439	XM_426439
ARHGAP6	Rho GTPase activating protein 6	418642	F1NGL1	XP_416840	XM_416840
ARHGAP8	Rho GTPase activating protein 8	418239	E1C874	NP_001191318	NM_001204389
ARHGDIA	Rho GDP dissociation inhibitor (GDI) alpha	769231	F1P3P3; Q5ZMT1	NP_001074340	NM_001080871
ARHGDIB	Rho GDP dissociation inhibitor (GDI) beta	417941	F1NLT8	XP_416182	XM_416182
ARHGEF10	Rho guanine nucleotide exchange factor (GEF) 10	421900	---	XP_001235643	XM_001235642
ARHGEF10L	Rho guanine nucleotide exchange factor (GEF) 10-like	419360	E1BRC9; E1C0Y6; E1C6G3	XP_003642556	XM_003642508
ARHGEF11	Rho guanine nucleotide exchange factor (GEF) 11	425979	H9KZZ5	XP_423659	XM_423659
ARHGEF12	Rho guanine nucleotide exchange factor (GEF) 12	419752	---	XP_417890	XM_417890
ARHGEF16	Rho guanine nucleotide exchange factor (GEF) 16	419386	E1BQT7	XP_417549	XM_417549
ARHGEF17	Rho guanine nucleotide exchange factor (GEF) 17	419067	E1C588	XP_003640670; XP_003640671	XM_003640622; XM_003640623
ARHGEF18	rho/rac guanine nucleotide exchange factor (GEF) 18	420132	---	XP_418249	XM_418249
ARHGEF19	Rho guanine nucleotide exchange factor (GEF) 19	419033	---	XP_417225	XM_417225
ARHGEF26	Rho guanine nucleotide exchange factor (GEF) 26	429163	F1NBE4	XP_426718	XM_426718
ARHGEF3	Rho guanine nucleotide exchange factor (GEF) 3	416000	F1P5U0; Q5ZLX4	NP_001025766	NM_001030595
ARHGEF33	Rho guanine nucleotide exchange factor (GEF) 33	425963	H9KZY2	XP_003640978	XM_003640930
ARHGEF37	Rho guanine nucleotide exchange factor (GEF) 37	416149	F1NZ00	XP_414480	XM_414480
ARHGEF38	Rho guanine nucleotide exchange factor (GEF) 38	428744	F1NUU4	XP_426302	XM_426302
ARHGEF4	Rho guanine nucleotide exchange factor (GEF) 4	424761	F1NVB0	XP_422582	XM_422582
ARHGEF6	Rac/Cdc42 guanine nucleotide exchange factor (GEF) 6	422247	F1NEF5; F1P1C7; Q5ZLR6	NP_001006432	NM_001006432
ARHGEF7	Rho guanine nucleotide exchange factor (GEF) 7	418761	---	XP_003640579; XP_416958	XM_003640531; XM_416958
ARHGEF9	Cdc42 guanine nucleotide exchange factor (GEF) 9	422315	E1C9C1	XP_420291	XM_420291
ARID1A	AT rich interactive domain 1A (SWI-like)	419542	---	XP_417693	XM_417693
ARID1B	AT rich interactive domain 1B (SWI1-like)	421650	---	XP_001232096	XM_001232095
ARID2	AT rich interactive domain 2 (ARID, RFX-like)	417804	E1C9H0	XP_416046	XM_416046
ARID3B	AT rich interactive domain 3B (BRIGHT-like)	100859297	E7EL51; F1NL47	NP_001243086; XP_003641855	NM_001256157; XM_003641807
ARID4A	AT rich interactive domain 4A (RBP1-like)	423541	F1NG14; F1NG15; F1NPA3; Q1G7H0; Q5ZIS6	NP_001012920	NM_001012902
ARID5B	AT rich interactive domain 5B (MRF1-like)	423661	F1NAR1; Q5ZJ69	NP_001026391	NM_001031220
ARIH1	Ariadne homolog, ubiquitin-conjugating enzyme E2 binding protein, 1 (Drosophila)	415319	Q5F465	NP_001025558	NM_001030387
ARIH2	ariadne homolog 2 (Drosophila)	416061	E1C1A1	NP_001186150	NM_001199221
ARL1	ADP-ribosylation factor-like 1	417934	E1BVB0	NP_001074963	NM_001081494
ARL10	ADP-ribosylation factor-like 10	416229	F1NST2	XP_414552	XM_414552
ARL11	ADP-ribosylation factor-like 11	418869	F1N8V9	XP_417064	XM_417064
ARL13A	ADP-ribosylation factor-like 13A	422255	E1C2Q2	XP_420241	XM_420241
ARL13B	ADP-ribosylation factor-like 13B	418431	E1C4A7; F1NUR0; Q5ZLQ9	XP_416642	XM_416642
ARL15	ADP-ribosylation factor-like 15	769515	F1NMW9	XP_001232798	XM_001232797
ARL2BP	ADP-ribosylation factor-like 2 binding protein	426495	F1NLR8; Q5ZKW5	NP_001007971	NM_001007970
ARL3	ADP-ribosylation factor-like 3	423865	F1N9A3	XP_421730	XM_421730
ARL4A	ADP-ribosylation factor-like 4A	420589	E1BZR2	XP_418690	XM_418690
ARL4C	ADP-ribosylation factor-like 4C	424026	---	XP_001237035	XM_001237034
ARL5B	ADP-ribosylation factor-like 5B	420513	E1BQL0	NP_001137441	NM_001143969
ARL6	ADP-ribosylation factor-like 6	418433	F1NSK2; Q5ZI75	NP_001025959	NM_001030788
ARL6IP1	ADP-ribosylation factor-like 6 interacting protein 1	416604	Q5ZLB2	NP_001006171	NM_001006171
ARL6IP4	ADP-ribosylation-like factor 6 interacting protein 4	427695	F1NHS0; F1NPS9; Q5F4A9	NP_001026641	NM_001031470
ARL6IP4; OGFOD2	ADP-ribosylation-like factor 6 interacting protein 4; 2-oxoglutarate and iron-dependent oxygenase domain containing 2	416832; 427695	F1NHS0; F1NPS9; Q5F4A9	NP_001026641; XP_415123	NM_001031470; XM_415123
ARL6IP5	ADP-ribosylation-like factor 6 interacting protein 5	426074	Q5F433	NP_001012623	NM_001012605
ARL8A	ADP-ribosylation factor-like 8A	421175	F1NJ19; F1NSI8; Q5ZKQ8	NP_001012886	NM_001012868
ARL8A; ARL8B	ADP-ribosylation factor-like 8A; ADP-ribosylation factor-like 8B	416109; 421175	F1NJ19; F1NSI8; F1P0Z7; Q5ZKQ8	NP_001012886; XP_414440	NM_001012868; XM_414440
ARL8B	ADP-ribosylation factor-like 8B	416109	---	XP_414440	XM_414440
ARL9	ADP-ribosylation factor-like 9	771078	---	XP_001234380	XM_001234379
ARMC1	armadillo repeat containing 1	429406	Q5ZMQ0	NP_001026744	NM_001031573
ARMC10	armadillo repeat containing 10	417720	E1C223	XP_415964	XM_415964
ARMC2	armadillo repeat containing 2	421767	---	XP_419797	XM_419797
ARMC3	armadillo repeat containing 3	420503	---	XP_003640709	XM_003640661
ARMC4	armadillo repeat containing 4	420482	E1C690	XP_003640684	XM_003640636
ARMC6	armadillo repeat containing 6	420112	E1C7G0	XP_001233055; XP_418230	XM_001233054; XM_418230
ARMC7	armadillo repeat containing 7	422118	E1C475	XP_420121	XM_420121
ARMC8	armadillo repeat containing 8	424731	---	NP_001239092	NM_001252163
ARMC9	armadillo repeat containing 9	424929	---	XP_422737	XM_422737
ARNT	aryl hydrocarbon receptor nuclear translocator	374026	H9L0U2; Q98SN3	NP_989531	NM_204200
ARNT2	aryl-hydrocarbon receptor nuclear translocator 2	415481	E1BS64; E1BS65	XP_413854	XM_413854
ARNTL	aryl hydrocarbon receptor nuclear translocator-like	374115	Q9DG35; Q9I8T7	NP_001001463	NM_001001463
ARNTL2	aryl hydrocarbon receptor nuclear translocator-like 2	373925	E1C1C5; F1NQL8; Q8QGQ7	NP_989464	NM_204133
ARPC1A	actin related protein 2/3 complex, subunit 1A, 41kDa	770269	Q5ZJI7	NP_001072963	NM_001079495
ARPC1B	actin related protein 2/3 complex, subunit 1B, 41kDa	416490	H9KZ89; Q5ZI99	NP_001025803	NM_001030632
ARPC2	actin related protein 2/3 complex, subunit 2, 34kDa	429041	F1P1K3	XP_426598	XM_426598
ARPC3	actin related protein 2/3 complex, subunit 3, 21kDa	416837	E1C8Y3	XP_415128	XM_415128
ARPC4	actin related protein 2/3 complex, subunit 4, 20kDa	416051	F1P010	NP_001244213; XP_414390	NM_001257284; XM_414390
ARPC5	actin related protein 2/3 complex, subunit 5, 16kDa	429075	F1NUA2; F1P1J4; Q5ZMV5	NP_001026732	NM_001031561
ARPP19	cAMP-regulated phosphoprotein, 19kDa	768853	Q5ZLY8	NP_001075176	NM_001081707
ARPP21	cAMP-regulated phosphoprotein, 21kDa	428459	E1BQG5	XP_426019	XM_426019
ARR3	Arrestin 3, retinal	769109	A4L9I7; F1NZ38	NP_001091002	NM_001097533
ARRDC1	arrestin domain containing 1	427772	F1P2X7; Q5ZKV5	NP_001026646	NM_001031475
ARRDC2	arrestin domain containing 2	771165	E1BZL4	XP_001233360	XM_001233359
ARRDC3	Arrestin domain containing 3	427107	E1C5A0	XP_424699	XM_424699
ARRDC4	arrestin domain containing 4	415509	E1C9I4	XP_413881	XM_413881
ARSA	arylsulfatase A	426863	F1NWF7	XP_424471	XM_424471
ARSB	arylsulfatase B	771459	F1NT29; F1P099	XP_003642960	XM_003642912
ARSD	arylsulfatase D	418658	E1BYN0	XP_416855	XM_416855
ARSE	arylsulfatase E (chondrodysplasia punctata 1)	418659	---	XP_416856	XM_416856
ARSG	arylsulfatase G	427811	---	XP_425382	XM_425382
ARSH	arylsulfatase family, member H	378798	F1NFQ0; F1NFQ1; Q71BV1	NP_989703	NM_204372
ARSI	arylsulfatase family, member I	427639	F1NQP9	XP_425212	XM_425212
ARSJ	arylsulfatase family, member J	422687	F1NH07	XP_420639	XM_420639
ARSK	arylsulfatase family, member K	427116	F1NAA9; Q5ZK90	NP_001026586	NM_001031415
ART1	ADP-ribosyltransferase 1	429485	F1NB75; F1NB76; F1P1B8; Q49L21	NP_001029998	NM_001034826
ART1; ART7B; ART7C; MADPRT	ADP-ribosyltransferase 1; GPI-anchored ADP-ribosyltransferase; erythroblast NAD(P)(+)--arginine ADP-ribosyltransferase-like; ADP-ribosyltransferase 1	428123; 428124; 428125; 429485; 768334	A9NJ59; A9NJ60; E1C399; F1NB07; F1NB75; F1NB76; F1NB78; F1NB80; F1ND02; F1ND03; F1P1B8; Q49L19; Q49L21	NP_001028818; NP_001029998; NP_001107976; XP_001231212; XP_003640650	NM_001033646; NM_001034826; NM_001114504; XM_001231211; XM_003640602
ART4	ADP-ribosyltransferase 4 (Dombrock blood group)	427879	B6RD37; B6RDJ8; B8LFM3; F1NPK1	NP_001135727	NM_001142255
ART5	ADP-ribosyltransferase 5	430227	H9KZW3	XP_427780	XM_427780
ARV1	ARV1 homolog (S. cerevisiae)	421546	F1NRD3	XP_419587	XM_419587
ARVCF	armadillo repeat gene deleted in velocardiofacial syndrome	395119	F1NEE2; F1NVG1; Q7T071; Q90939	NP_989796	NM_204465
AS3MT	arsenic (+3 oxidation state) methyltransferase	423870	F1NCJ8	XP_421735	XM_421735
ASAH1	N-acylsphingosine amidohydrolase (acid ceramidase) 1	422727	F1NWU5; Q5ZK58	NP_001006453	NM_001006453
ASAH2	N-acylsphingosine amidohydrolase (non-lysosomal ceramidase) 2	423679	F1NN67	XP_421560	XM_421560
ASAP1	ArfGAP with SH3 domain, ankyrin repeat and PH domain 1	428385	---	XP_425945	XM_425945
ASAP2	ArfGAP with SH3 domain, ankyrin repeat and PH domain 2	768599	F1NKX8	XP_001231632	XM_001231631
ASB1	ankyrin repeat and SOCS box containing 1	424030	F1NZ21	XP_421885	XM_421885
ASB10	ankyrin repeat and SOCS box containing 10	768438	---	XP_001231362	XM_001231361
ASB11	ankyrin repeat and SOCS box containing 11	428004	E1BTS9	XP_425574	XM_425574
ASB12	ankyrin repeat and SOCS box containing 12	422313	---	XP_420289	XM_420289
ASB13	Ankyrin repeat and SOCS box containing 13	416691	---	NP_001186223	NM_001199294
ASB14	ankyrin repeat and SOCS box containing 14	416003	F1NRG1	XP_414345	XM_414345
ASB15	Ankyrin repeat and SOCS box containing 15	417752	E1BRU8	XP_415996	XM_415996
ASB18	ankyrin repeat and SOCS box containing 18	424022	---	XP_421879	XM_421879
ASB2	ankyrin repeat and SOCS box containing 2	423428	E1C770	XP_421337	XM_421337
ASB3	ankyrin repeat and SOCS box-containing 3	428545	F1NCV6; Q5ZIE7	NP_001026688	NM_001031517
ASB4	ankyrin repeat and SOCS box containing 4	420569	F1NYR3	XP_418670	XM_418670
ASB5	ankyrin repeat and SOCS box containing 5	422572	E1C918	XP_001232358; XP_003641214; XP_420531	XM_001232357; XM_003641166; XM_420531
ASB6	ankyrin repeat and SOCS box containing 6	417194	F1NVE4; Q5F3T8	NP_001025859	NM_001030688
ASB7	ankyrin repeat and SOCS box containing 7	415518	Q5F3B0	NP_001012788	NM_001012770
ASB8	ankyrin repeat and SOCS box containing 8	426183	H9KZZ7; Q5ZHY6	NP_001012954	NM_001012936
ASB9	ankyrin repeat and SOCS box containing 9	418625	Q5ZJG2	NP_001006262	NM_001006262
ASCC1; SGPL1	activating signal cointegrator 1 complex subunit 1; sphingosine-1-phosphate lyase 1	423709; 423714	F1NMD8; F1NT55; Q5ZMK8	NP_001007947; XP_421588	NM_001007946; XM_421588
ASCC2	activating signal cointegrator 1 complex subunit 2	417016	E1C288	XP_003642266	XM_003642218
ASCC3	activating signal cointegrator 1 complex subunit 3	421790	F1NTD6	XP_419816	XM_419816
ASCL1	achaete-scute complex homolog 1 (Drosophila)	386573	Q90575; Q90764	NP_989743	NM_204412
ASCL2	achaete-scute complex homolog 2 (Drosophila)	395791	O12943	XP_003641403	NM_204949; XM_003641355
ASCL3	achaete-scute complex homolog 3 (Drosophila)	423052	F1NEX2	XP_001232099; XP_420985	XM_001232098; XM_420985
ASF1A	ASF1 anti-silencing function 1 homolog A (S. cerevisiae)	723780	F1NQL4; Q3C1E9	NP_001038155	NM_001044690
ASH1L	ash1 (absent, small, or homeotic)-like (Drosophila)	425064	---	XP_422858	XM_422858
ASH2L	ash2 (absent, small, or homeotic)-like (Drosophila)	426774	F1NLI7; Q5ZIL1	NP_001026566	NM_001031395
ASL1	argininosuccinate lyase	396498	P02521	NP_990832	NM_205501
ASL2	argininosuccinate lyase	417545	F1NHY4; F1NI02; F1P238; F1P247; P05083; Q5KTJ0	NP_001025885	NM_001030714
ASMT	acetylserotonin O-methyltransferase	396286	F1NFG5; Q92056	NP_990674	NM_205343
ASMTL	acetylserotonin O-methyltransferase-like	769097	E1BY36	XP_001231914; XP_003640570	XM_001231913; XM_003640522
ASNS	asparagine synthetase (glutamine-hydrolyzing)	420574	F1NWF6; Q5ZJU3	NP_001026148	NM_001030977
ASNSD1	asparagine synthetase domain containing 1	423983	E1C2S6; F1NZ51; Q5ZJN0	NP_001006509	NM_001006509
ASPA	aspartoacylase	417609	E1BVP5	XP_415853	XM_415853
ASPG	asparaginase homolog (S. cerevisiae)	772201	F1NW85	XP_001234724	XM_001234723
ASPH	Aspartate beta-hydroxylase	421142	---	XP_419224	XM_419224
ASPHD2	aspartate beta-hydroxylase domain containing 2	425447	E1BSD3	XP_423207	XM_423207
ASPM	asp (abnormal spindle) homolog, microcephaly associated (Drosophila)	424354	---	XP_422197	XM_422197
ASPN	asporin	415954	---	XP_414298	XM_414298
ASPSCR1	Alveolar soft part sarcoma chromosome region, candidate 1	417384	---	XP_415639	XM_415639
ASRGL1	asparaginase like 1	421868	F1P5N7	XP_419885	XM_419885
ASS1	argininosuccinate synthase 1	417185	E1BR38; F1P325; Q5ZJ23	NP_001013413	NM_001013395
ASTE1	asteroid homolog 1 (Drosophila)	420684	E1BWW5	XP_003640788	XM_003640740
ASTL	astacin-like metallo-endopeptidase (M12 family)	423176	F1NC64	XP_421101	XM_421101
ASTN1	astrotactin 1	429070	E1BSX5; F1NQ95	XP_426626	XM_426626
ASTN2	astrotactin 2	417242	F1NGF8	XP_003642322	XM_003642274
ASXL1	additional sex combs like 1 (Drosophila)	428158	F1P445	XP_425716	XM_425716
ASXL2	additional sex combs like 2 (Drosophila)	421993	E1BTW9; F1NTR5; Q5ZM88	NP_001026267	NM_001031096
ASXL3	additional sex combs like 3 (Drosophila)	421102	---	XP_419185	XM_419185
ASZ1	ankyrin repeat, SAM and basic leucine zipper domain containing 1	417768	A0M8U3; F1P0N8	NP_001128637	NM_001135165
ATAD1	ATPase family, AAA domain containing 1	423676	F1NT80	XP_421556	XM_421556
ATAD2	ATPase family, AAA domain containing 2	420346	F1NN52	XP_418453	XM_418453
ATAD2B	ATPase family, AAA domain containing 2B	421972	F1NUE7; F1NUZ7	XP_419982	XM_419982
ATAD3A	ATPase family, AAA domain containing 3A	419412	E1BRY8	XP_417573	XM_417573
ATAD5	ATPase family, AAA domain containing 5	417408	F1NJA2; F1NXM4; G1UCX5; Q5F395	XP_003642365	NM_001030705; XM_003642317
ATCAY	ataxia, cerebellar, Cayman type	420094	E1BRP6; E1BVX4	XP_418214	XM_418214
ATE1	Arginyltransferase 1	423936	E1BVG9; F1NDH1; Q5F446	NP_001073201	NM_001079733
ATF1	activating transcription factor 1	426873	---	XP_424481	XM_424481
ATF2	Activating transcription factor 2	395727	G1K321; G1K360; O93602	NP_990235	NM_204904
ATF3	activating transcription factor 3	421369	E1C5C1	XP_419429	XM_419429
ATF4	Activating transcription factor 4 (tax-responsive enhancer element B67)	395693	Q9W610	NP_990211	NM_204880
ATF4; LOC100858157	Activating transcription factor 4 (tax-responsive enhancer element B67); Uncharacterized LOC100858157	100858157; 395693	Q9W610	NP_990211	NM_204880; XR_140402
ATF6	activating transcription factor 6	424365	F1NGW9; F1NXG4	XP_422208	XM_422208
ATF7	activating transcription factor 7	769661	H9KZ53	XP_003643883	XM_003643835
ATF7IP	Activating transcription factor 7 interacting protein	417966	F1NLP9; Q5ZIE8; Q5ZLY9	NP_001012831	NM_001012813
ATG10	ATG10 autophagy related 10 homolog (S. cerevisiae)	427322	---	XP_424902	XM_424902
ATG12	ATG12 autophagy related 12 homolog (S. cerevisiae)	427390	---	XP_003643121; XP_424963	XM_003643073; XM_424963
ATG13	ATG13 autophagy related 13 homolog (S. cerevisiae)	423192	---	XP_003641435; XP_003641436; XP_421116	XM_003641387; XM_003641388; XM_421116
ATG14	ATG14 autophagy related 14 homolog (S. cerevisiae)	428922	E1BVG1	XP_426476	XM_426476
ATG16L1	ATG16 autophagy related 16-like 1 (S. cerevisiae)	424746	---	XP_003641799; XP_422568	XM_003641751; XM_422568
ATG2B	Autophagy related 2B	423441	---	XP_421350	XM_421350
ATG3	ATG3 autophagy related 3 homolog (S. cerevisiae)	418369	---	XP_416588	XM_416588
ATG4A	ATG4 autophagy related 4 homolog A (S. cerevisiae)	772074	Q5ZIW7	XP_003641164	XM_003641116
ATG4B	ATG4 autophagy related 4 homolog B (S. cerevisiae)	404750	F1NW36; Q6PZ02	NP_998738	NM_213573
ATG4C	ATG4 autophagy related 4 homolog C (S. cerevisiae)	424688	E1BS34	XP_422520	XM_422520
ATG5	ATG5 autophagy related 5 homolog (S. cerevisiae)	421784	Q5ZHW2	NP_001006409	NM_001006409
ATG7	ATG7 autophagy related 7 homolog (S. cerevisiae)	415961	Q5ZKY2	NP_001025763	NM_001030592
ATG9A	ATG9 autophagy related 9 homolog A (S. cerevisiae)	425722	Q3T8Z6	NP_001029993	NM_001034821
ATHL1	ATH1, acid trehalase-like 1 (yeast)	422991	F1NZI4	XP_420923	XM_420923
ATIC	5-aminoimidazole-4-carboxamide ribonucleotide formyltransferase/IMP cyclohydrolase	396091	B0FLP0; P31335; Q5U783; Q5U784; Q5U785; Q5XKY5	NP_990509	NM_205178
ATL1	atlastin GTPase 1	423577	F1NAM6	XP_421466	XM_421466
ATM	ataxia telangiectasia mutated	395401	E1C0Q6; F1N981; Q9PVT8	NP_001155872	NM_001162400
ATMIN	ATM interactor	426138	F1NG18	XP_423809	XM_423809
ATN1	atrophin 1	427946	E1C7L8	XP_425518	XM_425518
ATOH1	atonal homolog 1 (Drosophila)	428742	F1NX36	---	XR_026796
ATOH7	atonal homolog 7 (Drosophila)	395388	O57598	NP_989999	NM_204668
ATOH8	Atonal homolog 8 (Drosophila)	771738	D4P8R5; D7GLD5	NP_001171210	NM_001177739
ATOX1	ATX1 antioxidant protein 1 homolog (yeast)	770231	F1P2A1	XP_001233563	XM_001233562
ATP10A	ATPase, class V, type 10A	418685	F1NER7	XP_416881	XM_416881
ATP10B	ATPase, class V, type 10B	416159	E1BX05	XP_414491	XM_414491
ATP10D	ATPase, class V, type 10D	422768	E1C076; E1C8A3; F1NMP8	XP_420722	XM_420722
ATP11A	ATPase, class VI, type 11A	418749	F1NA11; F1P2T0	XP_416948	XM_416948
ATP11B	ATPase, class VI, type 11B	424964	F1NFH6; F1NNV3	XP_422773	XM_422773
ATP11C	ATPase, class VI, type 11C	422254	F1P437; F1P438	XP_420240	XM_420240
ATP12A	ATPase, H+/K+ transporting, nongastric, alpha polypeptide	419743	F1NZB7; Q5ZIK7	NP_001026080	NM_001030909
ATP13A1	ATPase type 13A1	426090	---	XP_423767	XM_423767
ATP13A2	ATPase type 13A2	419466	E1BQA9; F1NI63; Q5F3F1	NP_001026052	NM_001030881
ATP13A3	ATPase type 13A3	424898	E1C7N6	XP_422709	XM_422709
ATP13A4	ATPase type 13A4	424901	F1NBB4; Q5ZKB7	NP_001026485	NM_001031314
ATP13A5	ATPase type 13A5	424902	E1C3D9	XP_422713	XM_422713
ATP1A1	ATPase, Na+/K+ transporting, alpha 1 polypeptide	396530	F1NQS5; F1NQS6; F1NQS7; F1NQT6; F1NSY1; P09572; Q90W81	NP_990852	NM_205521
ATP1A2	ATPase, Na+/K+ transporting, alpha 2 polypeptide	396468	P24797	NP_990807	NM_205476
ATP1A3	ATPase, Na+/K+ transporting, alpha 3 polypeptide	396467	P24798	NP_990806	NM_205475
ATP1B1	ATPase, Na+/K+ transporting, beta 1 polypeptide	396529	P08251	NP_990851	NM_205520
ATP1B3	ATPase, Na+/K+ transporting, beta 3 polypeptide	396549	P33879	NP_990866	NM_205535
ATP1B4	ATPase, Na+/K+ transporting, beta 4 polypeptide	422365	E1BZF5; Q2HZ96	NP_001038116	NM_001044651
ATP2A1	ATPase, Ca++ transporting, cardiac muscle, fast twitch 1	396528	P13585	NP_990850	NM_205519
ATP2A2	ATPase, Ca++ transporting, cardiac muscle, slow twitch 2	396446	E1C8G4; Q03669	XP_003642224; XP_415130	XM_003642176; XM_415130
ATP2A3	ATPase, Ca++ transporting, ubiquitous	395707	F1NNV0; F1P143; Q9YGL9	NP_990222	NM_204891
ATP2B1	ATPase, Ca++ transporting, plasma membrane 1	374244	E1BRG6; F1NX46; F1NX47; Q98SH2	NP_001161474	NM_001168002
ATP2B2	ATPase, Ca++ transporting, plasma membrane 2	415958	F1NFC7; F1NJ71	XP_001231642; XP_001231678; XP_001231741; XP_001231768; XP_003642045; XP_003642046; XP_003642047; XP_414301	XM_001231641; XM_001231677; XM_001231740; XM_001231767; XM_003641997; XM_003641998; XM_003641999; XM_414301
ATP2B4	ATPase, Ca++ transporting, plasma membrane 4	419934	E1C784; E1C785	XP_418055	XM_418055
ATP2C1	ATPase, Ca++ transporting, type 2C, member 1	428450	E1BXM8	XP_426010	XM_426010
ATP2C2	ATPase, Ca++ transporting, type 2C, member 2	100859316	F1NSW4	XP_003641977	XM_003641929
ATP4B	ATPase, H+/K+ exchanging, beta polypeptide	386581	F1NA08; H6WP41; Q07420	NP_989749	NM_204418
ATP5A1	ATP synthase, H+ transporting, mitochondrial F1 complex, alpha subunit 1, cardiac muscle	374159	F1NGA2; F1NI22; Q8UVX3; Q90VX2; Q90ZX4; Q9DDH7	NP_989617	NM_204286
ATP5B	ATP synthase, H+ transporting, mitochondrial F1 complex, beta polypeptide	426673	H9L340; Q5ZLC5	NP_001026562	NM_001031391
ATP5C1	ATP synthase, H+ transporting, mitochondrial F1 complex, gamma polypeptide 1	419108	H9KZF8	XP_001231450; XP_417296	XM_001231449; XM_417296
ATP5E	ATP synthase, H+ transporting, mitochondrial F1 complex, epsilon subunit	768660	E1C4Q1	XP_001231375	XM_001231374
ATP5F1	ATP synthase, H+ transporting, mitochondrial Fo complex, subunit B1	419866	F1NSC1	XP_417993	XM_417993
ATP5G1	ATP synthase, H+ transporting, mitochondrial Fo complex, subunit C1 (subunit 9)	419992	---	XP_001233603; XP_418114	XM_001233602; XM_418114
ATP5G3	ATP synthase, H+ transporting, mitochondrial Fo complex, subunit C3 (subunit 9)	424142	E1BV48	XP_421992	XM_421992
ATP5H	ATP synthase, H+ transporting, mitochondrial Fo complex, subunit d	422115	E1C658	XP_001232599; XP_001232614	XM_001232598; XM_001232613
ATP5I	ATP synthase, H+ transporting, mitochondrial Fo complex, subunit E	769146	Q9YH14	NP_001091003	NM_001097534
ATP5J	ATP synthase, H+ transporting, mitochondrial Fo complex, subunit F6	418477	---	XP_001231639; XP_416685	XM_001231638; XM_416685
ATP5J2	ATP synthase, H+ transporting, mitochondrial Fo complex, subunit F2	416495	---	NP_001244129; XP_001233184; XP_001233197	NM_001257200; XM_001233183; XM_001233196
ATP5O	ATP synthase, H+ transporting, mitochondrial F1 complex, O subunit	418508	F1P304	XP_416717	XM_416717
ATP5S	ATP synthase, H+ transporting, mitochondrial Fo complex, subunit s (factor B)	423574	F1NBU5	XP_421463	XM_421463
ATP6AP1	ATPase, H+ transporting, lysosomal accessory protein 1	427854	---	NP_001239540	NM_001252611
ATP6AP1L	ATPase, H+ transporting, lysosomal accessory protein 1-like	427324	F1NDC1	---	XR_140360
ATP6AP2	ATPase, H+ transporting, lysosomal accessory protein 2	418573	F1NB42; F1NUL3; Q1XIH7; Q5ZMF2	NP_001025972	NM_001030801
ATP6V0A1	ATPase, H+ transporting, lysosomal V0 subunit a1	395474	E1C8Q5; F1NLH4; Q9I8D0	NP_990055	NM_204724
ATP6V0A2	ATPase, H+ transporting, lysosomal V0 subunit a2	395473	F1NNN8; Q9I8C9	NP_990054	NM_204723
ATP6V0A4	ATPase, H+ transporting, lysosomal V0 subunit a4	418104	F1P4D8; F1P4E6; Q5ZHY8	NP_001073571	NM_001080102
ATP6V0B	ATPase, H+ transporting, lysosomal 21kDa, V0 subunit b	424575	E1C5X9	XP_003641751	XM_003641703
ATP6V0C	ATPase, H+ transporting, lysosomal 16kDa, V0 subunit c	416753	F1P5K5; Q5ZJ19	XP_003642216	NM_001012791; XM_003642168
ATP6V0C; TBC1D24	ATPase, H+ transporting, lysosomal 16kDa, V0 subunit c; TBC1 domain family, member 24	100859828; 416753	F1NEU9; Q5ZJ19	NP_001244200; XP_003642216; XP_003642217	NM_001012791; NM_001257271; XM_003642168; XM_003642169
ATP6V0D1	ATPase, H+ transporting, lysosomal 38kDa, V0 subunit d1	415674	E1BVF8	XP_414041	XM_414041
ATP6V0D2	ATPase, H+ transporting, lysosomal 38kDa, V0 subunit d2	420210	Q5ZHL0	NP_001008455	NM_001008455
ATP6V0E1	ATPase, H+ transporting, lysosomal 9kDa, V0 subunit e1	768854	Q5ZJC4	NP_001091001	NM_001097532
ATP6V0E2	ATPase, H+ transporting V0 subunit e2	769770	F1P345	XP_001233069	XM_001233068
ATP6V1A	ATPase, H+ transporting, lysosomal 70kDa, V1 subunit A	395821	F1NBP2; F1NBW2; Q90647; Q90648	NP_990305	NM_204974
ATP6V1B2	ATPase, H+ transporting, lysosomal 56/58kDa, V1 subunit B2	395497	F1NID6; F1NU21; Q9I8A2	XP_424534	XM_424534
ATP6V1C1; LOC425509	ATPase, H+ transporting, lysosomal 42kDa, V1 subunit C1; V-type proton ATPase subunit C 1-like	420259; 425509	F1P0C1	XP_418370; XP_423262	XM_418370; XM_423262
ATP6V1C2	ATPase, H+ transporting, lysosomal 42kDa, V1 subunit C2	421939	F1NK97	XP_419951	XM_419951
ATP6V1D	ATPase, H+ transporting, lysosomal 34kDa, V1 subunit D	423280	E1BT00	XP_421199	XM_421199
ATP6V1E1	ATPase, H+ transporting, lysosomal 31kDa, V1 subunit E1	418162	Q5ZKJ9	NP_001006246	NM_001006246
ATP6V1G1	ATPase, H+ transporting, lysosomal 13kDa, V1 subunit G1	417249	E1C3C6	XP_415525	XM_415525
ATP6V1G3	ATPase, H+ transporting, lysosomal 13kDa, V1 subunit G3	424349	E1BVK7	XP_422192	XM_422192
ATP6V1H	ATPase, H+ transporting, lysosomal 50/57kDa, V1 subunit H	426199	F1NW50	NP_001184255	NM_001197326
ATP7A	ATPase, Cu++ transporting, alpha polypeptide	422333	F1NJ24; F1NUA1	XP_420307	XM_420307
ATP7B	ATPase, Cu++ transporting, beta polypeptide	418879	E1C2H2; E1C2H7; F1N8W2; F1P5C8	XP_417073	XM_417073
ATP8A1	ATPase, aminophospholipid transporter (APLT), class I, type 8A, member 1	422776	F1NX55	XP_420729	XM_420729
ATP8A2	ATPase, aminophospholipid transporter, class I, type 8A, member 2	418936	F1P2K5	XP_417130	XM_417130
ATP8B1	ATPase, class I, type 8B, member 1	426857	---	---	XR_026690
ATP8B2	ATPase, class I, type 8B, member 2	770035	---	XP_001233350	XM_001233349
ATP8B3	ATPase, aminophospholipid transporter, class I, type 8B, member 3	428328	F1NKB0; F1NVM2	XP_425888	XM_425888
ATP9A	ATPase, class II, type 9A	419345	F1NUR8	XP_417508	XM_417508
ATP9B	ATPase, class II, type 9B	420817	E1BRJ3; Q5ZKC0	XP_003640794	NM_001030996; XM_003640746
ATPAF1	ATP synthase mitochondrial F1 complex assembly factor 1	424616	---	XP_422453	XM_422453
ATPAF2	ATP synthase mitochondrial F1 complex assembly factor 2	416511	E1BUZ7	XP_414815	XM_414815
ATPBD4	ATP binding domain 4	423294	---	NP_001186639	NM_001199710
ATR	ataxia telangiectasia and Rad3 related	424777	F1NGW1	XP_003641789	XM_003641741
ATRIP	ATR interacting protein	415949	F1NGS1; G9MBR2	NP_001243080; XP_414293	NM_001256151; XM_414293
ATRN	attractin	422946	---	XP_420884	XM_420884
ATRNL1	attractin-like 1	423915	---	XP_421777	XM_421777
ATRX	alpha thalassemia/mental retardation syndrome X-linked	422331	E1C8H5	XP_420305	XM_420305
ATXN1	ataxin 1	420843	E1BZ23	XP_003640803	XM_003640755
ATXN10	ataxin 10	418245	E1C7R6	XP_416469	XM_416469
ATXN2	Ataxin 2	416877	F1NJL0	XP_415169	XM_415169
ATXN3; NDUFB1	ataxin 3; NADH dehydrogenase (ubiquinone) 1 beta subcomplex, 1, 7kDa	378424; 423415	F1NPT4; F1NUM6; F1NUM8; Q9W689	NP_001090996; NP_989688	NM_001097527; NM_204357
ATXN7	ataxin 7	416078	E1C712; F1N913	XP_414415	XM_414415
ATXN7L1	ataxin 7-like 1	427847	E1BZQ6	XP_425421	XM_425421
AUH	AU RNA binding protein/enoyl-CoA hydratase	427269	Q5ZM38	NP_001026600; NP_001239535	NM_001031429; NM_001252606
AUH; NR2C1	AU RNA binding protein/enoyl-CoA hydratase; nuclear receptor subfamily 2, group C, member 1	373913; 427269	E1BTQ9; E1BZA2; F1NW94; Q5ZM38; Q8JID3	NP_001026600; NP_001239535; NP_989455	NM_001031429; NM_001252606; NM_204124
AUP1	ancient ubiquitous protein 1	769206	H9L3T9	XP_001232437	XM_001232436
AURKA	aurora kinase A	428167	---	XP_425725	XM_425725
AURKAIP1	aurora kinase A interacting protein 1	419415	E1BUE2; Q5ZJI3	NP_001026043	NM_001030872
AUTS2	autism susceptibility candidate 2	417481	E1BVD2	XP_003642468; XP_415729	XM_003642420; XM_415729
AVEN	apoptosis, caspase activation inhibitor	395127	F1P0H8; Q70ET0	NP_001005791	NM_001005791
AVL9	AVL9 homolog (S. cerevisiase)	420750	F1NIK0	XP_418848	XM_418848
AVP	arginine vasopressin (neurophysin II, antidiuretic hormone, diabetes insipidus, neurohypophyseal)	396101	P24787	NP_990516	NM_205185
AVPR1A	arginine vasopressin receptor 1A	771773	A8CWP8; F1P546	NP_001103908	NM_001110438
AVPR1B	arginine vasopressin receptor 1B	428263	F1ND16; F1NVW1; Q90YN1	NP_001026669	NM_001031498
AVPR2	arginine vasopressin receptor 2	427860	F1NV74; Q9PTN7	NP_001026650	NM_001031479
AVR2; LOC427416	avidin related protein 2; avidin-related protein 2-like	395367; 427416	F1NWJ1; O13153; P56732; P56733	NP_001025519; XP_424989	NM_001030348; XM_424989
AXDND1	axonemal dynein light chain domain containing 1	424423	F1P2A3	XP_422266	XM_422266
AXIN1	axin 1	395786	F1NTP5; F1NVN1; O42400; Q693S0; Q6B3C4	NP_990275	NM_204944
AXIN2	Axin 2	395152	F1P136; Q6TLV9	NP_989822	NM_204491
AZI1	5-azacytidine induced 1	422074	E1BTL1	XP_420077	XM_420077
AZI2	5-azacytidine induced 2	420660	E1BU10	XP_418759	XM_418759
AZIN1	antizyme inhibitor 1	420254	F1NBW6; F1P0R8; Q5ZJ04	NP_001008729	NM_001008729
B-G	MHC B-G antigen	417035	F1NMT9; Q31399; Q31402; Q31404; Q31600; Q31608	NP_001025841; NP_001026980	NM_001030670; NM_001031810
B-G; LOC425214	MHC B-G antigen; uncharacterized LOC425214	417035; 425214	F1NMT9; H9L1B7; Q31399; Q31402; Q31403; Q31404; Q31407; Q31600; Q31608	NP_001025841; NP_001026980; XP_003642285	NM_001030670; NM_001031810; XM_003642237
B-LA; B-LA	MHC class II alpha chain; MHC class II antigen alpha	414855; 430189	B6RCM1; B6RCM6; B6RCM7; B6RCM8; B6RCM9; B6RCN1; B6RCN2; B6RCN3; B6RCN4; E9M254; F1C6X2; F1C6X4; F1C6X7; Q3HM56; Q4U5Z6; Q5ZJM9; Q6UZ95; Q6UZ96; Q6UZ97	NP_001001762; NP_001231990	NM_001001762; NM_001245061
B-MA2	B locus M beta chain 2	417051	A5HUL8; E1BZY0; F4ZCJ3; F4ZCJ4	NP_001128638	NM_001135166
B-NK	NK receptor-like	693259	A7DY55; F1NM43; Q6ZYP2; Q9PU48	NP_001038147	NM_001044682
B2M	Beta-2-microglobulin	414830	P21611; Q5W919; Q5W920; Q6L753; Q6L754; Q6L755; Q6L756; Q9I890	NP_001001750	NM_001001750
B3GALNT1	beta-1,3-N-acetylgalactosaminyltransferase 1 (globoside blood group)	425010	F1P3E2	XP_422814	XM_422814
B3GALNT2	beta-1,3-N-acetylgalactosaminyltransferase 2	430770	F1NVX0	XP_419557	XM_419557
B3GALT1	UDP-Gal:betaGlcNAc beta 1,3-galactosyltransferase, polypeptide 1	429027	E1C4T5	XP_426584	XM_426584
B3GALT2	UDP-Gal:betaGlcNAc beta 1,3-galactosyltransferase, polypeptide 2	769122	F1NVT9	XP_001231894	XM_001231893
B3GALT5	UDP-Gal:betaGlcNAc beta 1,3-galactosyltransferase, polypeptide 5	427985	E1BZG7	XP_425555	XM_425555
B3GALT6	UDP-Gal:betaGal beta 1,3-galactosyltransferase polypeptide 6	428185	E1BYQ2	XP_425743	XM_425743
B3GALTL	beta 1,3-galactosyltransferase-like	428075	F1P3A0	XP_425633	XM_425633
B3GAT1	beta-1,3-glucuronyltransferase 1 (glucuronosyltransferase P)	373949	F1NH16; F1NLK2; F1NR68; Q7T180; Q8AYG7	XP_417880	XM_417880
B3GAT2	beta-1,3-glucuronyltransferase 2 (glucuronosyltransferase S)	428638	F1NQ12; F1P5M5; Q5CAS7	NP_001026698	NM_001031527
B3GAT3	beta-1,3-glucuronyltransferase 3 (glucuronosyltransferase I)	374151	Q7T1E2; Q8AYG6	---	---
B3GNT2	UDP-GlcNAc:betaGal beta-1,3-N-acetylglucosaminyltransferase 2	421286	Q5ZK57	NP_001008457	NM_001008457
B3GNT5	UDP-GlcNAc:betaGal beta-1,3-N-acetylglucosaminyltransferase 5	424960	F1NRQ5	NP_001107233	NM_001113761
B3GNT7	UDP-GlcNAc:betaGal beta-1,3-N-acetylglucosaminyltransferase 7	424930	F1NU54	XP_422738	XM_422738
B3GNTL1	UDP-GlcNAc:betaGal beta-1,3-N-acetylglucosaminyltransferase-like 1	417333	E1BWL3	XP_415599	XM_415599
B4GALNT3	beta-1,4-N-acetyl-galactosaminyl transferase 3	418150	F1NN69	XP_416381	XM_416381
B4GALNT4	beta-1,4-N-acetyl-galactosaminyl transferase 4	770601	F1NZ39	XP_001233941	XM_001233940
B4GALT1	UDP-Gal:betaGlcNAc beta 1,4- galactosyltransferase, polypeptide 1	396121	F1NNJ4; F1P3F7; Q92074	NP_990533	NM_205202
B4GALT2	UDP-Gal:betaGlcNAc beta 1,4- galactosyltransferase, polypeptide 2	396122	F1N8F7; Q92073	NP_990534	NM_205203
B4GALT3	UDP-Gal:betaGlcNAc beta 1,4- galactosyltransferase, polypeptide 3	418342	E1C999	XP_416564	XM_416564
B4GALT4	UDP-Gal:betaGlcNAc beta 1,4- galactosyltransferase, polypeptide 4	418341	E1C9B0	XP_416563	XM_416563
B4GALT5	UDP-Gal:betaGlcNAc beta 1,4- galactosyltransferase, polypeptide 5	419358	E1C298	XP_417519	XM_417519
B4GALT6	UDP-Gal:betaGlcNAc beta 1,4- galactosyltransferase, polypeptide 6	421092	E1C5M2; F1NU87; Q5F3E5	NP_001026187	NM_001031016
B4GALT7	xylosylprotein beta 1,4-galactosyltransferase, polypeptide 7 (galactosyltransferase I)	416359	F1NRS0; F1NRS1; F1NRS2; Q2HPN7	NP_001035000	NM_001039911
B9D1	B9 protein domain 1	416525	E1BZ68	XP_414829	XM_414829
BAALC	brain and acute leukemia, cytoplasmic	420261	E1BSF4	XP_418371	XM_418371
BAAT	bile acid CoA: amino acid N-acyltransferase (glycine N-choloyltransferase)	769879	F1NBC1	XP_001233194	XM_001233193
BACE1	beta-site APP-cleaving enzyme 1	419768	F1N916; F1P5X9; Q5QHS1	XP_417908	XM_417908
BACE2	beta-site APP-cleaving enzyme 2	418526	F1NY96; F1NY97; Q5QHS0	XP_416735	XM_416735
BACH1	BTB and CNC homology 1, basic leucine zipper transcription factor 1	418488	E1BS39	XP_416696	XM_416696
BACH2	BTB and CNC homology 1, basic leucine zipper transcription factor 2	421809	E1BZR5	XP_419833	XM_419833
BAG1	BCL2-associated athanogene	420967	F1NPL0	NP_001103162	NM_001109692
BAG2	BCL2-associated athanogene 2	421880	E1BVW6	XP_419897	XM_419897
BAG3	BCL2-associated athanogene 3	423931	F1NY41; Q5ZIY1	XP_001233435; XP_003641578	NM_001006505; XM_001233434; XM_003641530
BAG4	BCL2-associated athanogene 4	426776	F1NLH5; F1NMY5	XP_003642595; XP_424388	XM_003642547; XM_424388
BAG5	BCL2-associated athanogene 5	423482	F1NZ14; Q5F486	NP_001026382	NM_001031211
BAHD1	bromo adjacent homology domain containing 1	423010	F1NFN2	NP_001186472	NM_001199543
BAI2	brain-specific angiogenesis inhibitor 2	426163	H9KZ65	XP_423828	XM_423828
BAI3	brain-specific angiogenesis inhibitor 3	421875	E1BZ18	XP_419892	XM_419892
BAIAP2	BAI1-associated protein 2	422077	F1NIJ2	XP_003642398; XP_003642399; XP_420080	XM_003642350; XM_003642351; XM_420080
BAIAP2L1	BAI1-associated protein 2-like 1	416437	E1C7T9	XP_414749	XM_414749
BAIAP2L2	BAI1-associated protein 2-like 2	418029	F1NBU7	XP_416266	XM_416266
BAK1	BCL2-antagonist/killer 1	419912	Q5F404	NP_001026091	NM_001030920
BAMBI	BMP and activin membrane-bound inhibitor homolog (Xenopus laevis)	428413	E1AWU3	NP_001182330	NM_001195401
BANK1	B-cell scaffold protein with ankyrin repeats 1	422711	F1NBU2	XP_420665	XM_420665
BANP	BTG3 associated nuclear protein	415834	E1C113	NP_001167016; NP_001167017	NM_001173545; NM_001173546
BAP1	BRCA1 associated protein-1 (ubiquitin carboxy-terminal hydrolase)	415944	F1NVF5; Q5F3N6	NP_001025761	NM_001030590
BARD1	BRCA1 associated RING domain 1	424010	Q5ZKJ1	NP_001026417	NM_001031246
BARX1; LOC395710	BARX homeobox 1; homeodomain-containing transcription factor BarX-1	374017; 395710	E1C6I7; Q9DED6; Q9W6D8	NP_989524	NM_204193
BARX2	BARX homeobox 2	395714	Q9W694	NP_990227	NM_204896
BASP1	brain abundant, membrane attached signal protein 1	373905	P23614	NP_989447	NM_204116
BATF	basic leucine zipper transcription factor, ATF-like	423364	E1C7D7	XP_421279	XM_421279
BATF3	basic leucine zipper transcription factor, ATF-like 3	421368	---	XP_419428	XM_419428
BAZ1A	bromodomain adjacent to zinc finger domain, 1A	428884	F1NFV8	XP_426440	XM_426440
BAZ1B	bromodomain adjacent to zinc finger domain, 1B	427819	F1NCQ5; F1P5W9; Q5ZIA9	XP_001233717	NM_001039315; XM_001233716
BAZ2B	bromodomain adjacent to zinc finger domain, 2B	395400	E1C3I8; F1NRS9; F1P2F7; Q9DE13	NP_990008	NM_204677
BBOX1	butyrobetaine (gamma), 2-oxoglutarate dioxygenase (gamma-butyrobetaine hydroxylase) 1	426932	E1BXI0	XP_424543	XM_424543
BBS10	Bardet-Biedl syndrome 10	417865	F1P4Z5	XP_416107	XM_416107
BBS12	Bardet-Biedl syndrome 12	422667	---	XP_420621	XM_420621
BBS2	Bardet-Biedl syndrome 2	415694	E1BUJ0; F1NC06; Q5ZI17	NP_001012795	NM_001012777
BBS4	Bardet-Biedl syndrome 4	415318	F1NGP6	XP_413706	XM_413706
BBS5	Bardet-Biedl syndrome 5	424165	E1C569	NP_001238960	NM_001252031
BBS7	Bardet-Biedl syndrome 7	771481	---	XP_003641242	XM_003641194
BBS9	Bardet-Biedl syndrome 9	420745	E1BUV8; E1BUV9	XP_418843	XM_418843
BBX	bobby sox homolog (Drosophila)	418407	---	XP_416622	XM_416622
BCAN	brevican	425976	---	XP_423655	XM_423655
BCAP29	B-cell receptor-associated protein 29	417702	E1C310	NP_001091114	NM_001097645
BCAR1	breast cancer anti-estrogen resistance 1	415691	---	XP_414057	XM_414057
BCAR3	Breast cancer anti-estrogen resistance 3	424494	E1C3C2	XP_422334	XM_422334
BCAS1	breast carcinoma amplified sequence 1	419338	---	XP_417504	XM_417504
BCAS1; LOC769185	breast carcinoma amplified sequence 1; breast carcinoma-amplified sequence 1-like	419338; 769185	F1NP35; F1P4C3	XP_001232411; XP_417504	XM_001232410; XM_417504
BCAS2	Breast carcinoma amplified sequence 2	419884	---	NP_001244224; XP_003642774	NM_001257295; XM_003642726
BCAS2; DENND2C	breast carcinoma amplified sequence 2; DENN/MADD domain containing 2C	100858235; 419884	F1P3E5	NP_001244224; NP_001244225; XP_003642774; XP_003642775	NM_001257295; NM_001257296; XM_003642726; XM_003642727
BCAS3	breast carcinoma amplified sequence 3	417643	F1P1V9; F1P1W0; Q5ZHJ7	XP_415889	XM_415889
BCAT1	branched chain amino-acid transaminase 1, cytosolic	418193	E1BSF5	XP_416424	XM_416424
BCCIP	BRCA2 and CDKN1A interacting protein	426225	E1BUA8	XP_423888	XM_423888
BCHE	Butyrylcholinesterase	395358	F1NK91; F1NV99; Q6ZXJ6; Q90ZK8	NP_989977	NM_204646
BCKDHA	branched chain keto acid dehydrogenase E1, alpha polypeptide	374210	Q98UJ8	---	---
BCKDHB	branched chain keto acid dehydrogenase E1, beta polypeptide	395375	F1NK15; F1NXT5; Q98UJ7	NP_989988	NM_204657
BCL10	B-cell CLL/lymphoma 10	424528	E7EC82; F1NKG4	NP_001188416	NM_001201487
BCL11A	B-cell CLL/lymphoma 11A (zinc finger protein)	421199	E1C8F1; F1NL75; Q5F459	NP_001026202	NM_001031031
BCL11B	B-cell CLL/lymphoma 11B (zinc finger protein)	423444	---	XP_003641457; XP_003641458	XM_003641409; XM_003641410
BCL2	B-cell CLL/lymphoma 2	396282	E1C6X9; Q00709	NP_990670	NM_205339
BCL2A1	BCL2-related protein A1	395673	Q9W6F2	NP_990197	NM_204866
BCL2L1	BCL2-like 1	373954	D2XQ55; Q07816; Q8UWJ1	NP_001020475	NM_001025304
BCL2L13	BCL2-like 13 (apoptosis facilitator)	418163	E1BXS1	XP_416394	XM_416394
BCL2L14	BCL2-like 14 (apoptosis facilitator)	419096	---	XP_417285	XM_417285
BCL2L15	BCL2-like 15	772088	F1NYS5	XP_001233931	XM_001233930
BCL6	B-cell CLL/lymphoma 6	424912	F1NBN7; Q5ZM39	NP_001012948	NM_001012930
BCL7A	B-cell CLL/lymphoma 7A	416856	E1BWB1	XP_415148	XM_415148
BCL9	B-cell CLL/lymphoma 9	418456	E1C3K6	XP_416666	XM_416666
BCL9L	B-cell CLL/lymphoma 9-like	419785	F1NU74	XP_417923	XM_417923
BCLAF1	BCL2-associated transcription factor 1	421691	---	XP_419728	XM_419728
BCMO1	beta-carotene 15,15'-monooxygenase 1	395346	Q9I993	NP_989966	NM_204635
BCO2	beta-carotene oxygenase 2	419792	E1C8E0	XP_417929	XM_417929
BCOR	BCL6 corepressor	418574	E1C807; F1NUI0	XP_003640556; XP_003640557; XP_416778	XM_003640508; XM_003640509; XM_416778
BCORL1	BCL6 corepressor-like 1	428687	F1NZP1	XP_426245	XM_426245
BCR	breakpoint cluster region	416952	E1C0M5; F1P007	XP_415244	XM_415244
BCS1L	BCS1-like (S. cerevisiae)	424212	E1BWG5; F1P1Q6; Q5ZI95	NP_001006520	NM_001006520
BDH1	3-hydroxybutyrate dehydrogenase, type 1	424891	F1NHH9; Q5ZJZ5	NP_001006547	NM_001006547
BDH2	3-hydroxybutyrate dehydrogenase, type 2	422715	F1NAM7	XP_420669	XM_420669
BDKRB2	bradykinin receptor B2	428906	O42402	NP_001026724	NM_001031553
BDNF	brain-derived neurotrophic factor	396186	P25429	NP_001026787	NM_001031616
BDP1	B double prime 1, subunit of RNA polymerase III transcription initiation factor IIIB	769916	---	XP_001233225	XM_001233224
BEAN1	brain expressed, associated with NEDD4, 1	415796	E1C1Z6	NP_001135398	NM_001141926
BECN1	beclin 1, autophagy related	420018	E1C9A1; F1P5F5; Q5ZKS6	NP_001006332	NM_001006332
BEGAIN	brain-enriched guanylate kinase-associated homolog (rat)	428909	F1P377	XP_426464	XM_426464
BEND2	BEN domain containing 2	772331	E1BTV2	XP_001235483	XM_001235482
BEND3	BEN domain containing 3	421778	F1NMS3	XP_003641058; XP_419805	XM_003641010; XM_419805
BEND4	BEN domain containing 4	422777	F1NWL4	XP_420730	XM_420730
BEND5	BEN domain containing 5	424628	F1NNJ0	XP_001234081; XP_422463	XM_001234080; XM_422463
BEND6	BEN domain containing 6	775985	E1BU30	XP_001235556	XM_001235555
BEND7	BEN domain containing 7	419037	E1C1C9	XP_417230	XM_417230
BEST1	bestrophin 1	423124	---	XP_421055	XM_421055
BEST3	bestrophin 3	417849	E1C882	NP_001186598	NM_001199669
BEST4	bestrophin 4	771694	---	NP_001239054	NM_001252125
BET1	blocked early in transport 1 homolog (S. cerevisiae)	420563	E1BRC4	NP_001186607	NM_001199678
BET1L	blocked early in transport 1 homolog (S. cerevisiae)-like	422985	F1P2A4; Q5ZLZ4	NP_001026344	NM_001031173
BET3L	BET3 like (S. cerevisiae)	421743	E1C401	XP_419775	XM_419775
BETA3	BHLH transcription factor beta3	395164	Q71T09	NP_989834	NM_204503
BF1	MHC class I antigen B-F minor heavy chain	724082	A0ZXL2; F1CN20; F1CN26; F1CN28; F1CN33; F1CN35	NP_001090999	NM_001097530
BF2	MHC BF2 class I	425389	B3GST0; B3GST1; D3YC78; E9LUH5; E9LUH6; E9LUH7; E9LUH8; F1NS77; O46788; O46789; O46790; O46792; O62864; O98230; O98231; O98232; P15979; Q31400; Q31412; Q31415; Q52PF5; Q5PY04; Q5W9B8; Q5W9B9; Q5W9C0; Q5W9C1; Q5W9C2; Q5W9C3; Q5W9C4; Q5W9C5; Q5W9C6; Q5W9C7; Q6F4D8; Q6F4D9; Q6F4E0; Q6F4E1; Q6F4E2; Q6F4E3; Q6F4E4; Q6F4E5; Q6F4E6; Q6F4E7; Q6F4E8; Q6F4E9; Q6F4F0; Q6F4F1; Q7YPW6; Q7YPW7; Q860I0; Q95593;…	NP_001026509	NM_001031338
BFAR	bifunctional apoptosis regulator	416424	E1C3U5	XP_414737	XM_414737
BFSP1	beaded filament structural protein 1, filensin	396056	E1BW12; F1NI25; Q06637	NP_990482	NM_205151
BFSP2	beaded filament structural protein 2, phakinin	396141	F1NQ75; F1NU12; Q90809; Q90976; Q91357	NP_990549	NM_205218
BG2	Intestinal zipper protein	396417	F1NBH8; Q31620; Q90712; Q91033; Q91034	NP_990767	NM_205436
BGLAP	bone gamma-carboxyglutamate (gla) protein	396348	P02822	NP_990718	NM_205387
BHLHA15	basic helix-loop-helix family, member a15	427655	E1C082	XP_425228	XM_425228
BHLHE23	basic helix-loop-helix family, member e23	395165	Q71T10	NP_989835	NM_204504
BHLHE40	basic helix-loop-helix family, member e40	416108	---	XP_414439	XM_414439
BHMT	betaine--homocysteine S-methyltransferase	416371	E1BSH9	XP_414685	XM_414685
BICC1	bicaudal C homolog 1 (Drosophila)	423604	F1NFQ2	NP_001186436	NM_001199507
BICD1	bicaudal D homolog 1 (Drosophila)	427919	F1NPR9	XP_425492	XM_425492
BICD2	bicaudal D homolog 2 (Drosophila)	415990	E1C2N3	XP_414332	XM_414332
BID	BH3 interacting domain death agonist	395236	Q8JGM8	NP_989883	NM_204552
BIK	BCL2-interacting killer (apoptosis-inducing)	776149	E1C005; E9JEC5	XP_001235363	XM_001235362
BIN1	bridging integrator 1	424228	E1BR61; F1NZ04; Q5ZLU2	NP_001006524	NM_001006524
BIN2	bridging integrator 2	777552	Q5ZKL7	NP_001074365	NM_001080896
BIRC2	baculoviral IAP repeat containing 2	374012	F1N997; F1N999; F1NPV2; Q90660; Q9IA69; Q9IA70	NP_001007823	NM_001007822
BIRC5	baculoviral IAP repeat containing 5	374078	F1NN48; F1NUL2; Q90VY6; Q90ZN0; Q9DDK0	NP_001012318; NP_001012319; NP_989566	NM_001012317; NM_001012318; NM_001012319; NM_204235
BIRC6	baculoviral IAP repeat containing 6	421463	F1NLF6	XP_419512	XM_419512
BIRC7	baculoviral IAP repeat containing 7	419239	E1C5V5	XP_417413	XM_417413
BIVM	basic, immunoglobulin-like variable motif containing	374099	---	NP_989582	NM_204251
BKJ	beta-keratin related protein	395651	O13152	NP_990177	NM_204846
BLB1; BLB2	MHC class II antigen B-F minor heavy chain; MHC class II beta chain	693256; 724083	A5HUL2; B5BSE2; B6C862; B6C863; B6RCN5; B6RCN6; B6RCN7; B6RCN9; B6RCP0; B6RCP1; B6RCP2; B6RCP3; B6RCP4; B6RCP5; B6RCP6; E2JF30; E2JF31; E2JF32; E2JF33; E5LFW9; O19491; O19492; O19493; O19494; O19495; O19496; O19497; O19498; O19499; O19500; O62862; O98226; O98228; Q31398; Q31553; Q4U5Z8; Q4U5Z9; Q4U600; Q6I6J9; Q6I6K0; Q6R674; Q95HB4; Q95HB5; Q9GIS8; Q9GIS9; Q9GIT0; Q9GIT1; Q9GIT2; Q9GJA4; Q9GJA5;…	NP_001038144; NP_001038159	NM_001044679; NM_001044694
BLK	B lymphoid tyrosine kinase	422035	E1BYL7	XP_420040	XM_420040
BLM	Bloom syndrome, RecQ helicase-like	415577	D3KR64; F1ND40; F1P3V1; Q5ZJM1; Q9I920	NP_001007088	NM_001007087
BLMH	bleomycin hydrolase	395996	P87362	NP_990435	NM_205104
BLNK	B-cell linker	395733	F1NFD7; Q9YGC1	NP_990239	NM_204908
BLOC1S2	biogenesis of lysosomal organelles complex-1, subunit 2	423768	E1BXG7; F1NAC2	XP_421639	XM_421639
BLOC1S3	biogenesis of lysosomal organelles complex-1, subunit 3	426500	H9L0H7	XP_430405	XM_430405
BLVRA	Biliverdin reductase A	420776	F1NAF5	XP_418872	XM_418872
BLZF1	basic leucine zipper nuclear factor 1	418371	E1C3Q8	XP_416590	XM_416590
BMA1	B locus M alpha chain 1	417050	A5HUL6; F4ZCJ1; F4ZCJ2	NP_001092823	NM_001099353
BMF	Bcl2 modifying factor	769140	A9XRG9; A9XRH0	NP_001106763	NM_001113292
BMP1	bone morphogenetic protein 1	414883	O57659	XP_001236767	XM_001236766
BMP10	bone morphogenetic protein 10	395177	Q70GM8	XP_417667	XM_417667
BMP15	bone morphogenetic protein 15	428697	F1NHC3; Q5XX12; Q645R0	NP_001006589	NM_001006589
BMP2	Bone morphogenetic protein 2	378779	Q6XDQ0; Q90751	NP_989689	NM_204358
BMP2K	BMP2 inducible kinase	422578	---	XP_420537	XM_420537
BMP3	bone morphogenetic protein 3	422581	F1NTA6; Q4FAB3	NP_001029991	NM_001034819
BMP4	Bone morphogenetic protein 4	396165	D3Y682; E1C0T2; F1NU66; Q90752	NP_990568	NM_205237; XR_140157
BMP5	Bone morphogenetic protein 5	396053	P87373; Q4PLC6	NP_990479	NM_205148
BMP6	bone morphogenetic protein 6	420868	F1P4H2	XP_418956	XM_418956
BMP7	bone morphogenetic protein 7	395494	F1NTS9; F1NUT2; F1P4B5; Q91403; Q9I8T6	XP_417496	XM_417496
BMPER	BMP binding endothelial regulator	420744	F1NEL8; Q643S1	NP_001007081	NM_001007080
BMPR1A	bone morphogenetic protein receptor, type IA	396308	F1NIX5; F1P3H0; Q5MJE3; Q90754	NP_990688	NM_205357
BMPR1B	bone morphogenetic protein receptor, type IB	396030	F1NIC3; F1NTD3; Q05438	NP_990463	NM_205132
BMPR2	bone morphogenetic protein receptor, type II (serine/threonine kinase)	374147	F1NQA4; O42124; Q788N3	NP_001001465	NM_001001465
BMS1	BMS1 homolog, ribosome assembly protein (yeast)	423633	F1NH69	NP_001186449	NM_001199520
BMX	BMX non-receptor tyrosine kinase	428003	E1BTT3	XP_425573	XM_425573
BNC1	basonuclin 1	427504	E1C4G7	XP_425076	XM_425076
BNC2	basonuclin 2	431604	F1NKP6	XP_003643044	XM_003642996
BNIP1	BCL2/adenovirus E1B 19kDa interacting protein 1	416207	F1NC47; H9KZ44	XP_414533	XM_414533
BNIP2	BCL2/adenovirus E1B 19kDa interacting protein 2	415379	F1NEC1	XP_413765	XM_413765
BNIP3	BCL2/adenovirus E1B 19kDa interacting protein 3	423971	F1NNM4	XP_421829	XM_421829
BNIP3L	BCL2/adenovirus E1B 19kDa interacting protein 3-like	419522	F1NKS1; Q5ZLK0	NP_001026056	NM_001030885
BOC	Boc homolog (mouse)	418361	E1C5M1	XP_416581	XM_416581
BOD1	biorientation of chromosomes in cell division 1	416210	---	XP_414535	XM_414535
BOD1L	biorientation of chromosomes in cell division 1-like	422838	---	XP_420784	XM_420784
BOK	BCL2-related ovarian killer	395445	F1N8M0; Q9I8I2	NP_990037	NM_204706
BOLL	bol, boule-like (Drosophila)	424061	F1NDD0	XP_421917	XM_421917
BORA	bora, aurora kinase A activator	769298	E1C0F4; Q5F3S1	NP_001073209	NM_001079741
BPGM	2,3-bisphosphoglycerate mutase	418172	Q5ZHV4	NP_001025939	NM_001030768
BPHL	Biphenyl hydrolase-like (serine hydrolase)	420885	---	XP_418972	XM_418972
BPI	bactericidal/permeability-increasing protein	419293	F1NXX9	XP_417465	XM_417465
BPIFB4	BPI fold containing family B, member 4	428160	F1NPN7	XP_425718	XM_425718
BPIFB8	Ovocalyxin-36	419289	F1P1Y2; Q53HW8	NP_001026032	NM_001030861
BPIL2	bactericidal/permeability-increasing protein-like 2	771461	---	XP_001234743	XM_001234742
BPIL3	bactericidal/permeability-increasing protein-like 3	419290	E1C1U3	XP_417463	XM_417463
BPNT1	3'(2'), 5'-bisphosphate nucleotidase 1	421347	F1P2D2; F1P2D4; Q5ZMR5	NP_001012892	NM_001012874
BPTF	bromodomain PHD finger transcription factor	100858895	---	XP_003642377	XM_003642329
BRAF	v-raf murine sarcoma viral oncogene homolog B1	396239	F1NJV6; F1P1L9; Q04982	NP_990633	NM_205302
BRAP	BRCA1 associated protein	772041	F1NJH4; F1NR06; Q5ZL09	NP_001073229	NM_001079761
BRAT1	BRCA1-associated ATM activator 1	769893	---	XP_001233206	XM_001233205
BRCA1	Breast cancer 1, early onset	373983	F1N8I5; Q90Z51	NP_989500	NM_204169
BRCA2	breast cancer 2, early onset	374139	E1C2I8; F1N924; F1P3B2; Q8QFV6; Q8UW79	NP_989607	NM_204276
BRCC3	BRCA1/BRCA2-containing complex, subunit 3	422201	E1C8A6; F1P4L2	XP_003641144; XP_420195	XM_003641096; XM_420195
BRD1	bromodomain containing 1	417731	---	NP_001186411	NM_001199482
BRD3	bromodomain containing 3	427757	E1C8U8	XP_425330	XM_425330
BRD4	bromodomain containing 4	---	H9L005; H9L2H3	---	---
BRD7	bromodomain containing 7	415730	E1BQ83; F1NMH9; Q5ZKG2	NP_001005839	NM_001005839
BRD8	bromodomain containing 8	416219	E1C130; F1NNQ0; Q5ZI47	NP_001006148	NM_001006148
BRD9	bromodomain containing 9	420799	E1C6P5	XP_418893	XM_418893
BRDT	bromodomain, testis-specific	424506	E1C671	XP_003641771	XM_003641723
BRE	brain and reproductive organ-expressed (TNFRSF1A modulator)	421417	E1BS09; Q5ZML0	NP_001008458	NM_001008458
BRF1	BRF1 homolog, subunit of RNA polymerase III transcription initiation factor IIIB (S. cerevisiae)	423503	---	XP_421405	XM_421405
BRF2; LOC100859102	BRF2, subunit of RNA polymerase III transcription initiation factor, BRF1-like; transcription factor IIIB 50 kDa subunit-like	100859102; 426772	E1C4I7	XP_003643371; XP_424383	XM_003643323; XM_424383
BRI3BP	BRI3 binding protein	416812	F1NBR2; Q25QX5	NP_001035209	NM_001040120
BRIP1	BRCA1 interacting protein C-terminal helicase 1	417642	E1C1X9; Q3YK19	NP_001028230	NM_001033058
BRIX1	BRX1, biogenesis of ribosomes, homolog (S. cerevisiae)	427433	Q5ZLV9	NP_001026620	NM_001031449
BRMS1L	breast cancer metastasis-suppressor 1-like	423328	F1N8F8; Q5ZLL9	NP_001007936	NM_001007935
BROX	BRO1 domain and CAAX motif containing	421334	E1BY06	XP_419397	XM_419397
BRP44	Brain protein 44	768451	---	XP_001231387	XM_001231386
BRP44L	brain protein 44-like	428592	F1P0W7; Q5ZIR0; Q5ZJW5	NP_001026695	NM_001031524
BRPF1	bromodomain and PHD finger containing, 1	427590	F1P2H3; Q5F3S4	NP_001026635	NM_001031464
BRPF3	bromodomain and PHD finger containing, 3	421182	---	XP_419262	XM_419262
BRS3	bombesin-like receptor 3	378927	Q802E6	NP_989737	NM_204406
BRSK2	BR serine/threonine kinase 2	423098	---	NP_001186525	NM_001199596
BRUNOL5	bruno-like 5, RNA binding protein (Drosophila)	425867	A5A2G3	XP_423569	XM_423569
BRUNOL6	bruno-like 6, RNA binding protein (Drosophila)	427479	A5A2G4; F1NXF6; F1P5J4	XP_425051	XM_425051
BRWD1	bromodomain and WD repeat domain containing 1	418521	E1BSG1	XP_416730	XM_416730
BRWD3	bromodomain and WD repeat domain containing 3	422281	F1N8L6	XP_003641127	XM_003641079
BSDC1	BSD domain containing 1	419658	F1NSP4; Q5ZIK6	NP_001012860	NM_001012842
BSG	basigin (Ok blood group)	770363	F1NL31; F1NMG0; P17790	NP_001185919; NP_001185921	NM_001198990; NM_001198992
BSPRY	B-box and SPRY domain containing	417272	F1NNQ6	XP_415546	XM_415546
BST1	bone marrow stromal cell antigen 1	422828	E5G6H7	NP_001186972	NM_001200043
BSX	brain-specific homeobox	395183	Q6RFL5	NP_989843	NM_204512
BTAF1	BTAF1 RNA polymerase II, B-TFIID transcription factor-associated, 170kDa (Mot1 homolog, S. cerevisiae)	423817	F1NHJ5	XP_421689	XM_421689
BTBD1	BTB (POZ) domain containing 1	415461	F1N9D5; F1N9D6; Q5F3A7; Q5ZIX0	NP_001005819	NM_001005819
BTBD10	BTB (POZ) domain containing 10	423029	E1C8S4	NP_001186504	NM_001199575
BTBD11	BTB (POZ) domain containing 11	771493	---	XP_001234771	XM_001234770
BTBD2	BTB (POZ) domain containing 2	420080	F1P111	XP_418200	XM_418200
BTBD3	BTB (POZ) domain containing 3	427688	F1NI11	XP_425262	XM_425262
BTBD7	BTB (POZ) domain containing 7	423424	E1C7C5	XP_421333	XM_421333
BTBD9	BTB (POZ) domain containing 9	421429	E1C497; Q5ZK96	NP_001008459	NM_001008459
BTC	Betacellulin	448833	F1NUU3; Q64EU6; Q6B4U6	NP_001004769	NM_001004769
BTD	biotinidase	420639	E1C3J7	NP_001186553	NM_001199624
BTF3	basic transcription factor 3	426154	H9L166	XP_423823	XM_423823
BTF3L4	basic transcription factor 3-like 4	424638	F1NKT5; Q5ZJG3	NP_001026456	NM_001031285
BTG1	B-cell translocation gene 1, anti-proliferative	396295	P34743	NP_990681	NM_205350
BTG2	BTG family, member 2	419932	---	XP_418053	XM_418053
BTG4	B-cell translocation gene 4	419781	E1C802	XP_417919	XM_417919
BTK	Bruton agammaglobulinemia tyrosine kinase	374075	Q5ZLF2; Q8JH64	NP_989564	NM_204233
BTLA	B and T lymphocyte associated	418426	E1C4A1; E1C4A4	XP_429579	XM_429579
BTN1A1	butyrophilin, subfamily 1, member A1	420061	F1NJ35; Q49K83	NP_001029989	NM_001034817
BTRC	beta-transducin repeat containing	423854	F1NYG1	XP_421723	XM_421723
BUB1	budding uninhibited by benzimidazoles 1 homolog (yeast)	421226	F1NDM5; Q5ZLQ8	NP_001012888	NM_001012870
BUB1B	Budding uninhibited by benzimidazoles 1 homolog beta (yeast)	378922	F1NEE4; F1NYL4; F1NYN1; Q5F3E7; Q800D4	NP_989734	NM_204403
BUB3	budding uninhibited by benzimidazoles 3 homolog (yeast)	423949	E1C9E5; Q5ZHW3	NP_001006506	NM_001006506
BUD13	BUD13 homolog (S. cerevisiae)	428248	E1C7R4; F1NPB3; Q5ZIJ0	NP_001034408	NM_001039319
BUD13; LOC770165	BUD13 homolog (S. cerevisiae); BUD13 homolog	428248; 770165	E1C7R4; F1NPB3; Q5ZIJ0	NP_001034408; XP_001233497	NM_001039319; XM_001233496
BUD31	BUD31 homolog (S. cerevisiae)	416492	E1BV47	XP_001233098; XP_001233146; XP_001233164; XP_414798	XM_001233097; XM_001233145; XM_001233163; XM_414798
BVES	blood vessel epicardial substance	408032	E1C6K5; E1C6K6; F1NTG5; F1NTG6; F1NTG7; Q9DG23; Q9DG25	NP_001001299	NM_001001299
BVES; POPDC3	blood vessel epicardial substance; popeye domain containing 3	395434; 408032	E1C6K5; E1C6K6; F1NTG5; F1NTG6; F1NTG7; Q9DG23; Q9DG25	NP_001001299; NP_990028	NM_001001299; NM_204697
BYSL	bystin-like	419927	F1NPV8	XP_418047	XM_418047
BZRAP1	Benzodiazapine receptor (peripheral) associated protein 1	417469	---	XP_415717	XM_415717
BZW1	basic leucine zipper and W2 domains 1	424073	F1NDS7; Q5ZLT7	NP_001006516	NM_001006516
BZW2	basic leucine zipper and W2 domains 2	420594	F1NCN8; F1NM03; Q5ZL42	NP_001006358	NM_001006358
C10H15orf27	chromosome 10 open reading frame, human C15orf27	770288	E1BZT4	XP_001233623	XM_001233622
C10H15orf40	Chromosome 10 open reading frame, human C15orf40	415460	F1NLN7	XP_413838	XM_413838
C10H15orf42	chromosome 10 open reading frame, human C15orf42	415489	---	XP_413862	XM_413862
C10H15orf44	chromosome 10 open reading frame, human C15orf44	415540	Q5ZK21	NP_001005825	NM_001005825
C10H15orf48	chromosome 10 open reading frame, human C15orf48	415442	H9L3R2	XP_413822	XM_413822
C10H15orf59	chromosome 10 open reading frame, human C15orf59	415313	F1NIC9	XP_413700	XM_413700
C10H15orf60	chromosome 10 open reading frame, human C15orf60	769575	F1NI44; F1NZF4	XP_001232862	XM_001232861
C11H16orf48	chromosome 11 open reading frame, human C16orf48	415643	F1P0V8	XP_414009	XM_414009
C11H16orf57	chromosome 11 open reading frame, human C16orf57	415628	F1NE74	XP_413994	XM_413994
C11H16orf70	chromosome 11 open reading frame, human C16orf70	415699	F1NNP4; Q5ZKM4	NP_001025736	NM_001030565
C11H16orf80	chromosome 11 open reading frame, human C16orf80	415627	Q5ZHP3	NP_001005833	NM_001005833
C11H16orf87	chromosome 11 open reading frame, human C16orf87	415747	E1C4P0	XP_414112	XM_414112
C11H19orf12; LOC415756	chromosome 11 open reading frame, human C19orf12; uncharacterized LOC415756	415756; 415757	F1NQ90	XP_001233462; XP_001233501; XP_001233516; XP_003641989; XP_414121	XM_001233461; XM_001233500; XM_001233515; XM_003641941; XM_414121
C11H19orf2	chromosome 11 open reading frame, human C19orf2	415759	F1NQ55	XP_414123	XM_414123
C11H19orf40	Chromosome 11 open reading frame, human C19orf40	415770	F1NH32	XP_414132	XM_414132
C11orf82	chromosome 11 open reading frame 82	---	E1C4L2	---	---
C12H3orf14	chromosome 12 open reading frame, human C3orf14	416073	E1C3D4	XP_414410	XM_414410
C12H3orf18	chromosome 12 open reading frame, human C3orf18	415914	E1BTP0	XP_414260	XM_414260
C12H3orf19	chromosome 12 open reading frame, human C3orf19	416044	F1NZD2; Q5ZIH9	NP_001006140	NM_001006140
C12H3orf37	chromosome 12 open reading frame, human C3orf37	416015	F1N801; F1NAA2; Q5ZJT1	NP_001006137	NM_001006137
C12H3orf64	Chromosome 12 open reading frame, human C3orf64	426961	Q5NDL3	NP_001026580	NM_001031409
C12H3orf67	chromosome 12 open reading frame, human C3orf67	416070	---	XP_414408	XM_414408
C12H9orf89	chromosome 12 open reading frame, human C9orf89	415987	---	XP_001232399; XP_001232444; XP_414329	XM_001232398; XM_001232443; XM_414329
C13H5orf15	chromosome 13 open reading frame, human C5orf15	416321	Q5ZKU9	NP_001006154	NM_001006154
C13H5orf24	chromosome 13 open reading frame, human C5orf24	416311	E1BTZ0	XP_414628	XM_414628
C13H5orf25	chromosome 13 open reading frame, human C5orf25	416231	E1C4I1	XP_414554	XM_414554
C13H5orf4	chromosome 13 open reading frame, human C5orf4	416256	F1NZP6	XP_414576	XM_414576
C13H5orf41	chromosome 13 open reading frame, human C5orf41	416206	---	XP_001231574	NM_001030608; XM_001231573
C13H5orf45	chromosome 13 open reading frame, human C5orf45	416283	E1C0I9; F1P2J1; F1P2J2	XP_414603	XM_414603
C14H16orf42	chromosome 14 open reading frame, human C16orf42	416590	F1P1D0	XP_414890	XM_414890
C14H16orf45	chromosome 14 open reading frame, human C16orf45	416594	E1BZC1	XP_414894	XM_414894
C14H16orf5	chromosome 14 open reading frame, human C16orf5	416662	E1C7Y2	XP_414959	XM_414959
C14H16orf52	chromosome 14 open reading frame, human C16orf52	416615	---	XP_414916	XM_414916
C14H16orf59	Chromosome 14 open reading frame, human C16orf59	416750	---	---	NR_036657
C14H16orf62	chromosome 14 open reading frame, human C16orf62	426995	F1NY74; F1NY75	XP_424599	XM_424599
C14H16orf73	chromosome 14 open reading frame, human C16orf73	416539	E1BQ93	XP_414840	XM_414840
C14H16orf79	chromosome 14 open reading frame, human C16orf79	771002	F1NAY7	XP_001234324	XM_001234323
C14H16orf88	chromosome 14 open reading frame, human C16orf88	426994	---	---	XR_140272
C14H16orf89	chromosome 14 open reading frame, human C16orf89	416394	F1NUB4; F1P0P1	XP_414708	XM_414708
C14H17orf103	chromosome 14 open reading frame, human C17orf103	416497	Q5ZJI6	NP_001025804	NM_001030633
C14H17orf39	chromosome 14 open reading frame, human C17orf39	416512	F1NEN3	XP_414816	XM_414816
C14H7orf26	chromosome 14 open reading frame, human C7orf26	416658	---	XP_414955	XM_414955
C14H7orf50	chromosome 14 open reading frame, human C7orf50	416455	---	XP_414763	XM_414763
C14H7orf62	Chromosome 14 open reading frame, human C7orf62	771073	---	XP_001234375	XM_001234374
C14H8orf33	chromosome 14 open reading frame, human C8orf33	416754	E1C3J6; F1NYI4	XP_415049	XM_415049
C15H12orf34	chromosome 15 open reading frame, human C12orf34	768548	E1BWS5	XP_001231228	XM_001231227
C15H12orf43	chromosome 15 open reading frame, human C12orf43	416966	E1C194	XP_415259	XM_415259
C15H12orf49	chromosome 15 open reading frame, human C12orf49	417026	Q5ZJE4	NP_001007842	NM_001007841
C15H12orf51	chromosome 15 open reading frame, human C12orf51	426582	F1N865	XP_415176	XM_415176
C15H12orf65	Chromosome 15 open reading frame, human C12orf65	416827	---	NP_001239017	NM_001252088
C15H14orf166B	chromosome 15 open reading frame, human C14orf166B	427063	E1C8Y1	XP_424659	XM_424659
C15H22orf13	Chromosome 15 open reading frame, human C22orf13	416948	F1P4I5	XP_415241	XM_415241
C15H22orf25	chromosome 15 open reading frame, human C22orf25	416784	Q5ZI44	NP_001007837	NM_001007836
C15H22orf36	chromosome 15 open reading frame, human C22orf36	769750	E1BUD5	XP_001233041	XM_001233040
C17H9orf114	chromosome 17 open reading frame, human C9orf114	417203	---	XP_003642310	XM_003642262
C17H9orf140	chromosome 17 open reading frame, human C9orf140	770416	F1NGR1	XP_001232160	XM_001232159
C17H9orf16	chromosome 17 open reading frame, human C9orf16	417215	E1BR18	NP_001183963	NM_001197034
C17H9orf167	chromosome 17 open reading frame, human C9orf167	417257	F1NLT2	XP_415532	XM_415532
C17H9orf171	chromosome 17 open reading frame, human C9orf171	417168	---	XP_415451	XM_415451
C17H9orf174; KIAA1529	chromosome 17 open reading frame, human C9orf174; KIAA1529	417161; 772014	F1NUZ3; F1NVI7	XP_001235216; XP_415444	XM_001235215; XM_415444
C17H9orf78	chromosome 17 open reading frame, human C9orf78	417189	F1P4D4	XP_415471	XM_415471
C17H9orf9	chromosome 17 open reading frame, human C9orf9	772069	E1BZQ8	XP_001233955; XP_003642356	XM_001233954; XM_003642308
C17H9orf91	chromosome 17 open reading frame, human C9orf91	417248	E1C3C9	XP_415524	XM_415524
C17H9orf96	chromosome 17 open reading frame, human C9orf96	417154	E1C133	XP_415437	XM_415437
C18H17orf28	chromosome 18 open reading frame, human C17orf28	422113	E1C0V2	XP_003642408; XP_003642409; XP_420116	XM_003642360; XM_003642361; XM_420116
C18H17orf56	chromosome 18 open reading frame, human C17orf56	422072	---	XP_420075	XM_420075
C18H17orf58	chromosome 18 open reading frame, human C17orf58	417421	---	XP_415673	XM_415673
C18H17orf62	chromosome 18 open reading frame, human C17orf62	417342	E1BYV2	XP_003642378; XP_415607	XM_003642330; XM_415607
C18H17orf67	chromosome 18 open reading frame, human C17orf67	417400	E1BTE6	XP_429510	XM_429510
C18H17orf70	FancA associated protein of 100 kDa	100049617	A5A748; F1NM99	NP_001092080	NM_001098610
C18H17orf75	chromosome 18 open reading frame, human C17orf75	417412	F1NQI9	XP_415664	XM_415664
C18H17orf80	chromosome 18 open reading frame, human C17orf80	417451	---	XP_415700	XM_415700
C18H17orf90	chromosome 18 open reading frame, human C17orf90	427815	---	XP_425387	XM_425387
C19H17orf108	chromosome 19 open reading frame, human C17orf108	776050	E1C7P6	XP_001234987	XM_001234986
C19H17orf63	chromosome 19 open reading frame, human C17orf63	417578	F1P367; Q5ZJ09	NP_001025889	NM_001030718
C19H17orf64	chromosome 19 open reading frame, human C17orf64	772176	---	XP_001235349	XM_001235348
C19H17orf78	chromosome 19 open reading frame, human C17orf78	417655	E1C6E7	XP_429523	XM_429523
C19H17orf85	Chromosome 19 open reading frame, human C17orf85	417552	F1NGX2; Q5ZM19	NP_001012823	NM_001012805
C19orf56	chromosome unknown open reading frame, human C19orf56	777443	F8RT80; H9KZH8	XP_003643560	XM_003643512
C1D	C1D nuclear receptor corepressor	421267	F1NRP5; Q5ZHS3	NP_001026207; NP_001231666	NM_001031036; NM_001244737
C1GALT1	core 1 synthase, glycoprotein-N-acetylgalactosamine 3-beta-galactosyltransferase, 1	420575	Q5F3G7	NP_001012575	NM_001012557
C1GALT1C1	C1GALT1-specific chaperone 1	422362	E1BSH4	XP_420333	XM_420333
C1H10orf47	chromosome 1 open reading frame, human C10orf47	419101	F1P001	XP_417289	XM_417289
C1H11orf30	Chromosome 1 open reading frame, human C11orf30	419090	---	XP_417282	XM_417282
C1H11orf54	chromosome 1 open reading frame, human C11orf54	419001	F1NY09	XP_417195	XM_417195
C1H11orf67	chromosome 1 open reading frame, human C11orf67	425610	E1C4H0	XP_003640647; XP_003640648; XP_424622	XM_003640599; XM_003640600; XM_424622
C1H11orf70	chromosome 1 open reading frame, human C11orf70	418985	E1C9D5	XP_417180	XM_417180
C1H11orf73	chromosome 1 open reading frame, human C11orf73	427034	Q5ZK09	NP_001026583	NM_001031412
C1H11orf75	chromosome 1 open reading frame, human C11orf75	772206	E1C385	NP_001157812	NM_001164340
C1H11orf87	chromosome 1 open reading frame, human C11orf87	418964	E1C0R1	XP_417157	XM_417157
C1H12orf11	chromosome 1 open reading frame, human C12orf11	418213	F1P1V8	XP_416439	XM_416439
C1H12orf23	chromosome 1 open reading frame, human C12orf23	418068	F1NZP4; Q5ZLA9	NP_001006244	NM_001006244
C1H12orf26	chromosome 1 open reading frame, human C12orf26	417879	F1NPQ6; F1NX07	XP_416122	XM_416122
C1H12orf28	chromosome 1 open reading frame, human C12orf28	427866	E1C867	XP_425440	XM_425440
C1H12orf29	chromosome 1 open reading frame, human C12orf29	417886	E1C609	XP_416129	XM_416129
C1H12orf32	chromosome 1 open reading frame, human C12orf32	426083	F1NHA4; Q5ZHP6	NP_001006563	NM_001006563
C1H12orf35	chromosome 1 open reading frame, human C12orf35	418136	F1NPQ9; Q5BMR5	XP_416367	XM_416367
C1H12orf4	chromosome 1 open reading frame, human C12orf4	419041	F1P5X8; Q5ZMU2	XP_001231610	NM_001006282; XM_001231609
C1H12orf45	chromosome 1 open reading frame, human C12orf45	418079	F1P126	XP_003640440; XP_416315	XM_003640392; XM_416315
C1H12orf48	chromosome 1 open reading frame, human C12orf48	418092	H9L3V7; Q5ZKL9	NP_001025934	NM_001030763
C1H12orf5	chromosome 1 open reading frame, human C12orf5	419040	F1P5Y7	XP_417232	XM_417232
C1H12orf50	chromosome 1 open reading frame, human C12orf50	417885	F1NEB8	XP_416128	XM_416128
C1H12orf53	chromosome 1 open reading frame, human C12orf53	418282	F1NGK1	XP_416507	XM_416507
C1H12orf57	chromosome 1 open reading frame, human C12orf57	771099	F1N845	XP_001234404	XM_001234403
C1H12orf59	chromosome 1 open reading frame, human C12orf59	426455	---	XP_424100	XM_424100
C1H12orf66	chromosome 1 open reading frame, human C12orf66	417822	E1C5A4	XP_416063	XM_416063
C1H12orf69	chromosome 1 open reading frame, human C12orf69	769813	E1BSH5	XP_001233128	XM_001233127
C1H12orf73	chromosome 1 open reading frame, human C12orf73	772057	E1BYY5	NP_001129044	NM_001135572
C1H13orf15	chromosome 1 open reading frame, human C13orf15	418833	F1NXF2	XP_417029	XM_417029
C1H1orf114	chromosome 1 open reading frame, human C1orf114	418370	E1C3R6	XP_416589	XM_416589
C1H21orf33	chromosome 1 open reading frame, human C21orf33	418552	E1BYE3; F1NT93; Q5ZM94	NP_001025969	NM_001030798
C1H21orf59	chromosome 1 open reading frame, human C21orf59	418497	Q5ZIK5	NP_001006258	NM_001006258
C1H21orf62	chromosome 1 open reading frame, human C21orf62	418501	F1P5R6	XP_416709	XM_416709
C1H21orf63	chromosome 1 open reading frame, human C21orf63	418496	---	XP_416704	XM_416704
C1H21orf7	chromosome 1 open reading frame, human C21orf7	418487	E1BS54	XP_416695	XM_416695
C1H21orf91	chromosome 1 open reading frame, human C21orf91	395489	F1NCL2; Q9I8W6	NP_990068	NM_204737
C1H22orf23	chromosome 1 open reading frame, human C22orf23	418031	E1C5L4	XP_416268	XM_416268
C1H22orf28	chromosome 1 open reading frame, human C22orf28	418064	F1NYI3	XP_416300	XM_416300
C1H22orf32	chromosome 1 open reading frame, human C22orf32	770755	F1NJF9	XP_001233649	XM_001233648
C1H22orf33	chromosome 1 open reading frame, human C22orf33	418050	E1C8D7	XP_416285	XM_416285
C1H22orf40	chromosome 1 open reading frame, human C22orf40	418246	F1NX53; Q5ZKB8	NP_001025943	NM_001030772
C1H2orf29	chromosome 1 open reading frame, human C2orf29	418711	F1P4V4	XP_416910	XM_416910
C1H2orf40	Chromosome 1 open reading frame, human C2orf40	771055	---	XP_001234361; XP_003640576	XM_001234360; XM_003640528
C1H2orf49	chromosome 1 open reading frame, human C2orf49	418725	F1P4R4; Q5ZK74	NP_001025984	NM_001030813
C1H3orf15	chromosome 1 open reading frame, human C3orf15	427953	---	XP_425525	XM_425525
C1H3orf17	chromosome 3 open reading frame 17-like	418364	---	XP_003640504	XM_003640456
C1H3orf26	chromosome 1 open reading frame, human C3orf26	418381	F1NQL6	XP_416600	XM_416600
C1H3orf38	chromosome 1 open reading frame, human C3orf38	418429	E1C7U8	XP_416640	XM_416640
C1H3orf52	chromosome 1 open reading frame, human C3orf52	418422	---	XP_416636	XM_416636
C1H7orf23	chromosome 1 open reading frame, human C7orf23	418647	---	XP_416845	XM_416845
C1H7orf53	chromosome 1 open reading frame, human C7orf53	417778	E1BYQ0	XP_416022	XM_416022
C1H7orf55	chromosome 1 open reading frame, human C7orf55	770530	E1BXK8	XP_001233541	XM_001233540
C1H7orf60	chromosome 1 open reading frame, human C7orf60	417776	F1NUL4; F1NY31; Q5ZJ87	NP_001025905	NM_001030734
C1HXorf22	chromosome 1 open reading frame, human CXorf59	418583	---	XP_416785	XM_416785
C1HXorf22; C1HXorf22	chromosome 1 open reading frame, human CXorf59; chromosome 1 open reading frame, human CXorf22	418583; 771858	F1NTU7	XP_001235080; XP_416785	XM_001235079; XM_416785
C1HXorf36	chromosome 1 open reading frame, human CXorf36	418555	---	XP_416761	XM_416761
C1QA	complement component 1, q subcomponent, A chain	419504	---	XP_417654	XM_417654
C1QB	complement component 1, q subcomponent, B chain	428197	F1NH19	XP_425756	XM_425756
C1QBP	complement component 1, q subcomponent binding protein	395538	F1NJF0; Q9W7P7	XP_415748	XM_415748
C1QC	complement component 1, q subcomponent, C chain	419503	F1NH17	XP_417653	XM_417653
C1QL3	complement component 1, q subcomponent-like 3	771966	E1BWI1	XP_001235173	XM_001235172
C1QL4	complement component 1, q subcomponent-like 4	430993	H9L0Q2	XP_428543	XM_428543
C1QTNF1	C1q and tumor necrosis factor related protein 1	768784	E1BZF8	XP_001231907	XM_001231906
C1QTNF2	C1q and tumor necrosis factor related protein 2	416156	F1NSB4	XP_414488	XM_414488
C1QTNF3	C1q and tumor necrosis factor related protein 3	427430	E1C6T7	XP_001232277; XP_425002	XM_001232276; XM_425002
C1QTNF4	C1q and tumor necrosis factor related protein 4	428863	---	XP_426420	XM_426420
C1QTNF5	C1q and tumor necrosis factor related protein 5	769989	E1C8T2	XP_001232467	XM_001232466
C1QTNF6	C1q and tumor necrosis factor related protein 6	427908	F1NE01	XP_425481	XM_425481
C1QTNF7	C1q and tumor necrosis factor related protein 7	422831	F1NG79	XP_001232334; XP_420778	XM_001232333; XM_420778
C1QTNF8	C1q and tumor necrosis factor related protein 8	427666	F1P202	XP_425240	XM_425240
C1QTNF9	C1q and tumor necrosis factor related protein 9	771538	---	XP_001234806	XM_001234805
C1R	complement component 1, r subcomponent	418295	---	XP_416518	XM_416518
C1S	complement component 1, s subcomponent	418294	F1N803; Q5F3N3	NP_001025948	NM_001030777
C20H20orf108	chromosome 20 open reading frame, human C20orf108	428168	F1NQN6; F1NTV5; Q5ZIS2	NP_001026664	NM_001031493
C20H20orf11	chromosome 20 open reading frame, human C20orf11	419235	Q5ZKQ7	NP_001007872	NM_001007871
C20H20orf111	chromosome 20 open reading frame, human C20orf111	419203	E1BSL5	NP_001025152	NM_001029981
C20H20orf112	chromosome 20 open reading frame, human C20orf112	771902	---	XP_001235117	XM_001235116
C20H20orf123	chromosome 20 open reading frame, human C20orf123	419205	F1NW26; F1P263; F1P268	XP_417382	XM_417382
C20H20orf151	chromosome 20 open reading frame, human C20orf151	771409	F1NZV8	XP_001234683	XM_001234682
C20H20orf160	chromosome 20 open reading frame, human C20orf160	419279	E1BVT5; E1BZ83	XP_003642516	XM_003642468
C20H20orf177	chromosome 20 open reading frame, human C20orf177	419221	---	XP_417398	XM_417398
C20H20orf20	chromosome 20 open reading frame, human C20orf20	419233	F1NRH0	XP_417408	XM_417408
C20H20orf24	chromosome 20 open reading frame, human C20orf24	768550	F1NXV3; Q5ZMJ3	NP_001073205	NM_001079737
C20H20orf4	chromosome 20 open reading frame, human C20orf4	419118	Q5ZJ10	NP_001026015	NM_001030844
C20H20orf43	Chromosome 20 open reading frame, human C20orf43	419329	Q5ZJN1	NP_001006297	NM_001006297
C20H20orf54	chromosome 20 open reading frame, human C20orf54	419270	---	XP_417443	XM_417443
C20H20orf85	Chromosome 20 open reading frame, human C20orf85	419321	---	XP_417493	XM_417493
C20H20orf96	chromosome 20 open reading frame, human C20orf96	419273	---	XP_417446	XM_417446
C21H1orf144	chromosome 21 open reading frame, human C1orf144	419462	Q5ZK25	NP_001026051	NM_001030880
C21H1orf158	AQ	395744	F1P4Y1; Q9YH28	NP_990245	NM_204914
C21H1orf159	chromosome 21 open reading frame, human C1orf159	419427	E1BYJ5	XP_417588	XM_417588
C21H1orf174	chromosome 21 open reading frame, human C1orf174	419378	---	XP_417541	XM_417541
C21H1orf187	chromosome 21 open reading frame, human C1orf187	419492	B6ZI38; G1K2Z9	NP_001136320	NM_001142848
C21H1orf222	KIAA1751	419400	---	XP_417562	XM_417562
C21H1orf50	chromosome 21 open reading frame, human C1orf50	419506	F1NG19	XP_417656	XM_417656
C22H2orf42	Chromosome 22 open reading frame, human C2orf42	426298	---	NP_001182524	NM_001195595
C23H1orf130	chromosome 23 open reading frame, human C1orf130	419596	E1BSW9	XP_417742	XM_417742
C23H1orf172	Chromosome 23 open reading frame, human C1orf172	769268	---	XP_001232503	XM_001232502
C23H1orf216	chromosome 23 open reading frame, human C1orf216	770397	E1C9J7	XP_001233734	XM_001233733
C23H1orf38	chromosome 23 open reading frame, human C1orf38	419565	E1C2D8	XP_417712	XM_417712
C24H11orf1	chromosome 24 open reading frame, human C11orf1	419799	F1NTY2	XP_417936	XM_417936
C24H11orf34	chromosome 24 open reading frame, human C11orf34	419791	E1C8H4	XP_429703	XM_429703
C24H11orf52	chromosome 24 open reading frame, human C11orf52	770939	E1BRY1	XP_001234251	XM_001234250
C24H11orf57	chromosome 24 open reading frame, human C11orf57	419794	---	XP_417931	XM_417931
C25H1orf43	chromosome 25 open reading frame, human C1orf43	430589	H9L076; H9L3J9; Q5ZL40	NP_001026761	NM_001031590
C26H1orf116	chromosome 26 open reading frame, human C1orf116	419849	E1BXU2; E1C2R4	XP_417978	XM_417978
C26H1orf183	chromosome 26 open reading frame, human C1orf183	419868	E1BU53	XP_417995	XM_417995
C26H1orf74	chromosome 26 open reading frame, human C1orf74	771943	F1NL43	XP_001235153	XM_001235152
C26H1orf88	chromosome 26 open reading frame, human C1orf88	419930	F1NIS7	XP_418050	XM_418050
C26H6orf106	chromosome 26 open reading frame, human C6orf106	419902	Q5F3N9	NP_001026090	NM_001030919
C26H6orf130	chromosome 26 open reading frame, human C6orf130	419916	Q5ZHP2	NP_001026092	NM_001030921
C26H6orf89	chromosome 26 open reading frame, human C6orf89	419817	Q5F344	NP_001012566	NM_001012548
C27H17orf104	chromosome 27 open reading frame, human C17orf104	771115	---	XP_001234414	XM_001234413
C27H17orf105	Chromosome 27 open reading frame, human C17orf105	771706	---	XP_001233398	XM_001233397
C28H19orf10	chromosome 28 open reading frame, human C19orf10	420161	F1NZ31; Q5ZMF4	NP_001006342	NM_001006342
C28H19orf21	chromosome 28 open reading frame, human C19orf21	420097	E1BWU1	XP_418218	XM_418218
C28H19orf22	chromosome 28 open reading frame, human C19orf22	770563	F1P3H3	XP_001233902	XM_001233901
C28H19orf50	chromosome 28 open reading frame, human C19orf50	771070	E1BRK6	XP_001233288	XM_001233287
C28H19orf6	chromosome 28 open reading frame, human C19orf6	420101	---	XP_418222	XM_418222
C2CD2	C2 calcium-dependent domain containing 2	418532	---	XP_416741	XM_416741
C2CD2L	C2CD2-like	428233	E1C7Z3	XP_425792	XM_425792
C2CD3	C2 calcium-dependent domain containing 3	419059	E1C5B0	XP_417250	XM_417250
C2CD4C	C2 calcium-dependent domain containing 4C	428334	F1NYY7	XP_425894	XM_425894
C2H10orf112	chromosome 2 open reading frame, human C10orf112	420512	---	XP_418614	XM_418614
C2H18orf1	chromosome 2 open reading frame, human C18orf1	421044	E1BYM2; Q5ZJR6	NP_001026184	NM_001031013
C2H18orf21	chromosome 2 open reading frame, human C18orf21	420954	E1BSV8	XP_419039	XM_419039
C2H18orf45	chromosome 2 open reading frame, human C18orf45	421073	---	XP_419159	XM_419159
C2H18orf55	chromosome 2 open reading frame, human C18orf55	421016	E1BTY5	XP_419102	XM_419102
C2H18orf63	uncharacterized LOC421015	421015	E1BUE8	XP_429804	XM_429804
C2H18orf8	chromosome 2 open reading frame, human C18orf8	421075	F1NSW5	XP_419161	XM_419161
C2H1orf35	chromosome 2 open reading frame, human C1orf35	769525	---	XP_001232812	XM_001232811
C2H3orf23	chromosome 2 open reading frame, human C3orf23	420670	F1NZH5	XP_418769	XM_418769
C2H3orf39	Chromosome 2 open reading frame, human C3orf39	428446	Q5NDE8	NP_001012294	NM_001012294
C2H3orf75	chromosome 2 open reading frame, human C3orf75	420379	E1BRP9	XP_418484	XM_418484
C2H5orf22	chromosome 2 open reading frame, human C5orf22	420910	E1C2V6; E1C7C9	XP_418996	XM_418996
C2H6orf105	chromosome 2 open reading frame, human C6orf105	771464	E1BYG2	XP_001234747	XM_001234746
C2H6orf145	chromosome 2 open reading frame, human C6orf145	420880	E1BVZ1	XP_418967	XM_418967
C2H6orf62	chromosome 2 open reading frame, human C6orf62	421005	E1C1Y2	XP_419091	XM_419091
C2H7orf10	chromosome 2 open reading frame, human C7orf10	420768	F1NMS5	XP_003640760	XM_003640712
C2H7orf11	chromosome 2 open reading frame, human C7orf11	776599	---	XP_001236113; XP_003640778	XM_001236112; XM_003640730
C2H7orf25	chromosome 2 open reading frame, human C7orf25	420771	---	XP_418867	XM_418867
C2H7orf31	chromosome 2 open reading frame, human C7orf31	420625	F1NML3	XP_418724	XM_418724
C2H7orf41	chromosome 2 open reading frame, human C7orf41	420679	F1NG50	XP_003640768	XM_003640720
C2H7orf46	chromosome 2 open reading frame, human C7orf46	420620	E1BS42	XP_418719	XM_418719
C2H7orf57	chromosome 2 open reading frame, human C7orf57	420941	F1NT52	XP_419025	XM_419025
C2H7orf63	Chromosome 2 open reading frame, human C7orf63	420542	---	XP_418644	XM_418644
C2H8orf22	chromosome 2 open reading frame, human C8orf22	425711	E1BRC2	XP_423439	XM_423439
C2H8orf34	chromosome 2 open reading frame, human C8orf34	768864	---	XP_001232049	XM_001232048
C2H8orf37	chromosome 2 open reading frame, human C8orf37	420235	F1P3N5	XP_418346	XM_418346
C2H8orf38	chromosome 2 open reading frame, human C8orf38	420233	F1NEK7	XP_418344	XM_418344
C2H8orf45	chromosome 2 open reading frame, human C8orf45	428360	E1C2X4	XP_425920	XM_425920
C2H8orf46; C2H8orf46	chromosome 2 open reading frame, human C8orf46; chromosome 8 open reading frame 46-like	426416; 768549	E1C1C4	XP_001231372; XP_424064	XM_001231371; XM_424064
C2H8orf76	chromosome 2 open reading frame, human C8orf76	420348	F1NN31	XP_418455	XM_418455
C2H9orf4	chromosome 2 open reading frame, human C9orf4	420961	E1BSU1; E1C973	XP_419045	XM_419045
C2H9orf5	chromosome 2 open reading frame, human C9orf5	420957	E1BSU4	XP_419042	XM_419042
C3	complement component 3	396370	A6N9E0; Q2MV09; Q90633	NP_990736	NM_205405
C3AR1	complement component 3a receptor 1	418198	F1NMA7; Q5ZIN6	NP_001025940	NM_001030769
C3H17orf59	chromosome 3 open reading frame, human C17orf59	421818	F1P3U2	XP_419842	XM_419842
C3H1orf100	chromosome 3 open reading frame, human C1orf100	421496	E1C3A4	XP_419543	XM_419543
C3H1orf101	chromosome 3 open reading frame, human C1orf101	421495	---	XP_419542	XM_419542
C3H1orf115	chromosome 3 open reading frame, human C1orf115	421341	---	XP_429841	XM_429841
C3H1orf31	Chromosome 3 open reading frame, human C1orf31	771652	---	XP_001233932	XM_001233931
C3H1orf95	chromosome 3 open reading frame, human C1orf95	421315	F1NEU0	XP_001232618; XP_419380	XM_001232617; XM_419380
C3H1orf96	chromosome 3 open reading frame, human C1orf96	421533	E1C8G9	XP_419574	XM_419574
C3H20orf103	chromosome 3 open reading frame, human C20orf103	416732	---	XP_415029	XM_415029
C3H20orf26	chromosome 3 open reading frame, human C20orf26	421242	E1BX74	XP_419314	XM_419314
C3H20orf3	chromosome 3 open reading frame, human C20orf3	416715	G1K318; Q5ZIF1	NP_001006177	NM_001006177
C3H20orf7	chromosome 3 open reading frame, human C20orf7	416742	Q5F492	NP_001012710	NM_001012692
C3H20orf72	Chromosome 3 open reading frame, human C20orf72	416719	E1BWL8	XP_415017	XM_415017
C3H20orf94	chromosome 3 open reading frame, human C20orf94	416738	F1NI40	NP_001186341	NM_001199412
C3H2orf18	chromosome 3 open reading frame, human C2orf18	431081	E1BRQ4	XP_428633	XM_428633
C3H2orf43	chromosome 3 open reading frame, human C2orf43	421967	E1C3X4; F1N977; F1NV10; Q5F477	NP_001026264	NM_001031093
C3H2orf56	chromosome 3 open reading frame, human C2orf56	421477	F1NUX9; F1NUY0	XP_419525	XM_419525
C3H2orf71	chromosome 3 open reading frame, human C2orf71	768975	E1BTY6	XP_001232149	XM_001232148
C3H6orf103	chromosome 3 open reading frame, human C6orf103	421618	---	XP_419656	XM_419656
C3H6orf115	chromosome 3 open reading frame, human C6orf115	770205	F1NZC1	XP_001233537	XM_001233536
C3H6orf120	chromosome 3 open reading frame, human C6orf120	421557	F1NYK5; Q5ZLK8	NP_001026236	NM_001031065
C3H6orf162	chromosome 3 open reading frame, human C6orf162	421827	F1P1R4	XP_419851	XM_419851
C3H6orf163	chromosome 3 open reading frame, human C6orf163	421826	E1C216	XP_419850	XM_419850
C3H6orf165	chromosome 3 open reading frame, human C6orf165	421824	E1C217	XP_419848	XM_419848
C3H6orf168	chromosome 3 open reading frame, human C6orf168	428630	E1C3J5	XP_426188	XM_426188
C3H6orf170	chromosome 3 open reading frame, human C6orf170	421725	F1N9K0	XP_003641083	XM_003641035
C3H6orf186	chromosome 3 open reading frame, human C6orf186	421758	E1C9C0	XP_419788	XM_419788
C3H6orf192	Chromosome 3 open reading frame, human C6orf192	421699	E1C5U8; E1C5U9	XP_419737	XM_419737
C3H6orf203	chromosome 3 open reading frame, human C6orf203	421779	F1NMS1	XP_419806	XM_419806
C3H6orf211	chromosome 3 open reading frame, human C6orf211	421637	F1NN96	XP_419676	XM_419676
C3H6orf57	chromosome 3 open reading frame, human C6orf57	421870	---	XP_001234195; XP_419887	XM_001234194; XM_419887
C3H6orf70	chromosome 3 open reading frame, human C6orf70	421553	E1C478	XP_419594	XM_419594
C3H6orf72	chromosome 3 open reading frame, human C6orf72	395778	F1NA52; F1NAD1; O93585	NP_001186315	NM_001199386
C3H8orf80	chromosome 3 open reading frame, human C8orf80	422000	E1BTB4	XP_420008	XM_420008
C4	complement C4	426611	Q076D6	NP_001070701	NM_001077233
C4; CYP21A2	complement C4; cytochrome P450, family 21, subfamily A, polypeptide 2	426611; 429828	F1NAT0; F1NUI9; Q076D6	NP_001070701; NP_001092828	NM_001077233; NM_001099358
C4BPA	complement component 4 binding protein, alpha	395384	F1P3M9; Q9DEG0	NP_989995	NM_204664
C4H20orf194	chromosome 4 open reading frame, human C20orf194	422945	F1P2X2	XP_420883	XM_420883
C4H2orf65	chromosome 4 open reading frame, human C2orf65	425987	H9KZZ6	XP_423668	XM_423668
C4H4orf17	chromosome 4 open reading frame, human C4orf17	772145	---	XP_001235323	XM_001235322
C4H4orf21	chromosome 4 open reading frame, human C4orf21	428770	E1BQD2	XP_426326	XM_426326
C4H4orf29	chromosome 4 open reading frame, human C4orf29	422499	F1NBQ9; F1NBR0; Q5F467	NP_001026305	NM_001031134
C4H4orf32	chromosome 4 open reading frame, human C4orf32	422694	---	XP_420647	XM_420647
C4H4orf34	chromosome 4 open reading frame, human C4orf34	422793	---	XP_420745	XM_420745
C4H4orf47	chromosome 4 open reading frame, human C4orf47	422718	E1BXI5; E1C629	XP_420672	XM_420672
C4H4orf52	chromosome 4 open reading frame, human C4orf52	769392	F1NQM1	NP_001138902	NM_001145430
C4H8orf40	chromosome 4 open reading frame, human C8orf40	422492	F1NAT7	NP_001183985	NM_001197056
C4HXorf41	chromosome 4 open reading frame, human CXorf41	422184	E1BXG3	XP_003641140; XP_420180	XM_003641092; XM_420180
C4HXorf56	chromosome 4 open reading frame, human CXorf56	428719	E1BYZ0	XP_003641171; XP_426277	XM_003641123; XM_426277
C4HXorf57	chromosome 4 open reading frame, human CXorf57	422381	F1NID1	XP_420350	XM_420350
C5	complement component 5	417122	E1BRS7; E1BXV7	XP_415405	XM_415405
C5AR1	complement component 5a receptor 1	430484	H9L014	XP_428039	XM_428039
C5H11orf10	chromosome 5 open reading frame, human C11orf10	422964	Q76LT9	NP_001006464	NM_001006464
C5H11orf16	chromosome 5 open reading frame, human C11orf16	423053	F1NA77	XP_420986	XM_420986
C5H11orf2	chromosome 5 open reading frame, human C11orf2	422984	Q5ZJ25	NP_001026343	NM_001031172
C5H11orf24	uncharacterized LOC423113	423113	E1C533	XP_003641420; XP_003641421	XM_003641372; XM_003641373
C5H11orf41	chromosome 5 open reading frame, human C11orf41	421598	---	XP_419635	XM_419635
C5H11orf46	chromosome 5 open reading frame, human C11orf46	421605	F1NIP8; Q5ZKR1	NP_001026237	NM_001031066
C5H11orf49	chromosome 5 open reading frame, human C11orf49	423188	F1P3V2	XP_421113	XM_421113
C5H11orf58	chromosome 5 open reading frame, human C11orf58	395520	F1NAU3; Q9I9J6	NP_990089	NM_204758
C5H11orf74	chromosome 5 open reading frame, human C11orf74	423166	F1NU02	XP_421092	XM_421092
C5H11orf9	chromosome 5 open reading frame, human C11orf9	422966	F1NLQ3; F1NT99	XP_420899	XM_420899
C5H11orf96	chromosome 5 open reading frame, human C11orf96	770209	---	NP_001138514	NM_001145042
C5H14orf1	chromosome 5 open reading frame, human C14orf1	423366	F1NA69	XP_421281	XM_421281
C5H14orf101	Chromosome 5 open reading frame, human C14orf101	423551	F1NF74	XP_421443	XM_421443
C5H14orf102	chromosome 5 open reading frame, human C14orf102	423404	E1C4F1	XP_421314	XM_421314
C5H14orf105	chromosome 5 open reading frame, human C14orf105	423546	E1BXF9	XP_421439	XM_421439
C5H14orf109	UPF0694 transmembrane protein C14orf109 homolog	423422	Q5ZLR7	NP_001073200	NM_001079732
C5H14orf118	chromosome 5 open reading frame, human C14orf118	423368	E1C534	XP_421283	XM_421283
C5H14orf126	chromosome 5 open reading frame, human C14orf126	770817	E1C762	XP_001234140	XM_001234139
C5H14orf129	chromosome 5 open reading frame, human C14orf129	423442	Q5ZMC6	NP_001008473	NM_001008473
C5H14orf135	chromosome 5 open reading frame, human C14orf135	423528	F1NF96	XP_421424	XM_421424
C5H14orf149	chromosome 5 open reading frame, human C14orf149	423531	E1BSN3	XP_421428	XM_421428
C5H14orf159	chromosome 5 open reading frame, human C14orf159	423409	F1NS20	XP_421319	XM_421319
C5H14orf166	chromosome 5 open reading frame, human C14orf166	396326	F1NA45; F1NEI4; Q90706	NP_990700	NM_205369
C5H14orf166B	chromosome 5 open reading frame, human C14orf166B	428893	E1C3J0	XP_426448	XM_426448
C5H14orf169	chromosome 5 open reading frame, human C14orf169	423249	F1NJ46; Q5ZMM1	NP_001026367	NM_001031196
C5H14orf37	chromosome 5 open reading frame, human C14orf37	423545	---	XP_421438	XM_421438
C5H14orf43	chromosome 5 open reading frame, human C14orf43	423245	F1P4S4	XP_421167	XM_421167
C5H14orf45	chromosome 5 open reading frame, human C14orf45	423344	F1NBQ2; F1NJ81	XP_421259	XM_421259
C5H14orf49	chromosome 5 open reading frame, human C14orf49	423439	E1C8I6	XP_421348	XM_421348
C5H14orf79	chromosome 5 open reading frame, human C14orf79	423498	E1BUP5	XP_421401	XM_421401
C5H15orf23	chromosome 5 open reading frame, human C15orf23	426704	F1NIG4; Q5ZHW1	NP_001026564	NM_001031393
C5H15orf24	chromosome 5 open reading frame, human C15orf24	423288	E1C0R9	XP_421207	XM_421207
C5H15orf29	chromosome 5 open reading frame, human C15orf29	423287	F1P0J1; Q5ZIG6	NP_001026369	NM_001031198
C5H15orf41	chromosome 5 open reading frame, human C15orf41	423293	F1NDC5; G1K323; Q5F476	NP_001026371	NM_001031200
C5H15orf52	chromosome 5 open reading frame, human C15orf52	423013	F1NH20	XP_420944	XM_420944
C5H15orf57	chromosome 5 open reading frame, human C15orf57	423009	F1NJH9	NP_001186460	NM_001199531
C6	complement component 6	431585	B8ZX71; F1N9Z9	NP_001138321	NM_001144849
C6H10orf107	chromosome 6 open reading frame, human C10orf107	423662	F1NAQ4	XP_421543	XM_421543
C6H10orf11	chromosome 6 open reading frame, human C10orf11	770056	F1NYR1	XP_001233371	XM_001233370
C6H10orf118	chromosome 6 open reading frame, human C10orf118	423905	E1BWV9	XP_421767	XM_421767
C6H10orf12	chromosome 6 open reading frame, human C10orf12	428970	F1NKQ6	XP_426527	XM_426527
C6H10orf122	chromosome 6 open reading frame, human C10orf122	768745	---	XP_001231850	XM_001231849
C6H10orf137	chromosome 6 open reading frame, human C10orf137	430674	E1BUH2; E1BUH3	XP_428227	XM_428227
C6H10orf2	progressive external ophthalmoplegia 1	425626	H9L0S8; Q5ZIW1	NP_001026515	NM_001031344
C6H10orf26	chromosome 6 open reading frame, human C10orf26	423867	E1BZP5	XP_001232452; XP_001232471; XP_421732	XM_001232451; XM_001232470; XM_421732
C6H10orf28	chromosome 6 open reading frame, human C10orf28	423835	---	XP_430100	XM_430100
C6H10orf32	Chromosome 6 open reading frame, human C10orf32	423869	F1NCP6	XP_421734	XM_421734
C6H10orf46	chromosome 6 open reading frame, human C10orf46	423926	Q5ZMM9	NP_001026409	NM_001031238
C6H10orf54	chromosome 6 open reading frame, human C10orf54	769500	---	XP_001231981	XM_001231980
C6H10orf57	chromosome 6 open reading frame, human C10orf57	423634	E1BZD7	NP_001186452	NM_001199523
C6H10orf71	chromosome 6 open reading frame, human C10orf71	423784	---	XP_421655	XM_421655
C6H10orf76	chromosome 6 open reading frame, human C10orf76	423850	F1NK09	XP_421719	XM_421719
C6H10orf88	chromosome 6 open reading frame, human C10orf88	427084	F1NPB6	XP_424678	XM_424678
C6H10orf90	chromosome 6 open reading frame, human C10orf90	423959	---	XP_421818	XM_421818
C6H10orf96	chromosome 6 open reading frame, human C10orf96	771350	E1BWP7	XP_001234639	XM_001234638
C7	complement component 7	427187	E1C6U2; F1DQG4	XP_424774	XM_424774
C7H21orf58	chromosome 7 open reading frame, human C21orf58	424040	---	XP_421896	XM_421896
C7H2orf69	chromosome 7 open reading frame, human C2orf69	424064	Q5ZKY1	NP_001034395	NM_001039306
C7H2orf76	chromosome 7 open reading frame, human C2orf76	424274	E1C8H3	XP_422121	XM_422121
C7H2orf77	Chromosome 7 open reading frame, human C2orf77	424161	F1NPD0; F1NPE7	XP_422007	XM_422007
C8A	complement component 8, alpha polypeptide	429111	---	XP_426667	XM_426667
C8B	Complement component 8, beta polypeptide	424669	E1C7C1	XP_422502	XM_422502
C8G	complement component 8, gamma polypeptide	770691	---	XP_001234027	XM_001234026
C8H14orf80	chromosome 8 open reading frame, human C14orf80	424373	F1NSF8	XP_422217	XM_422217
C8H1orf112	chromosome 8 open reading frame, human C1orf112	424399	E1C4I2	XP_422243	XM_422243
C8H1orf123	chromosome 8 open reading frame, human C1orf123	424650	F1NSN4	XP_422484	XM_422484
C8H1orf123; TRA2A	chromosome 8 open reading frame, human C1orf123; transformer 2 alpha homolog (Drosophila)	420618; 424650	E1C875; F1NPM7; F1NSN4; Q5ZLY6	NP_001006360; XP_422484	NM_001006360; XM_422484
C8H1orf168	chromosome 8 open reading frame, human C1orf168	424668	E1C7R7	XP_422501	XM_422501
C8H1orf173	Chromosome 8 open reading frame, human C1orf173	424719	---	XP_422545	XM_422545
C8H1orf177	chromosome 8 open reading frame, human C1orf177	424660	F1NDK0	XP_422494	XM_422494
C8H1orf190	chromosome 8 open reading frame, human C1orf190	424608	F1NHW6	XP_422445	XM_422445
C8H1orf21	chromosome 8 open reading frame, human C1orf21	424449	---	XP_001233452; XP_422292	XM_001233451; XM_422292
C8H1orf27	chromosome 8 open reading frame, human C1orf27	424455	F1NYX9; Q5ZKH8	NP_001026443	NM_001031272
C8H1orf52	chromosome 8 open reading frame, human C1orf52	424529	F1NJ13	XP_422366	XM_422366
C8H1orf9	Chromosome 8 open reading frame, human C1orf9	424385	---	XP_422229	XM_422229
C9H21orf2	chromosome 9 open reading frame, human C21orf2	424866	F1NW25; Q5ZIB6	NP_001006544	NM_001006544
C9H2orf54	chromosome 9 open reading frame, human C2orf54	770366	F1NB18	XP_001233703	XM_001233702
C9H2orf82	chromosome 9 open reading frame, human C2orf82	768774	E1BTJ4	XP_001231548	XM_001231547
C9H3orf58	chromosome 9 open reading frame, human C3orf58	424771	E1C167	XP_422591	XM_422591
CA10	carbonic anhydrase X	417389	---	XP_415644	XM_415644
CA12	carbonic anhydrase XII	415370	---	XP_413756	XM_413756
CA2	carbonic anhydrase II	396257	P07630	NP_990648	NM_205317
CA3	carbonic anhydrase III, muscle specific	420209	---	XP_418320	XM_418320
CA3; LOC100858989	carbonic anhydrase III, muscle specific; carbonic anhydrase 13-like	100858989; 420208	F1P1P0; F1P1Q1	XP_003640859; XP_418319	XM_003640811; XM_418319
CA4	carbonic anhydrase IV	417647	---	XP_415893	XM_415893
CA5B	Carbonic anhydrase VB, mitochondrial	415833	---	XP_414195	XM_414195
CA6	carbonic anhydrase VI	428187	F1NZ64	XP_425745	XM_425745
CA7	carbonic anhydrase VII	415791	E1BUE6	XP_414152	XM_414152
CA8	carbonic anhydrase VIII	421139	E1C5I4	XP_003640867; XP_419221	XM_003640819; XM_419221
CA9	carbonic anhydrase IX	770004	---	XP_001233320	XM_001233319
CAAP1	caspase activity and apoptosis inhibitor 1	427364	E1BSD0	XP_424940	XM_424940
CAB39	calcium binding protein 39	424830	E1C407	XP_003641786	XM_003641738
CAB39L	calcium binding protein 39-like	418865	F1NM29; F1NV80; Q5ZL22	NP_001006272	NM_001006272
CABIN1	calcineurin binding protein 1	416938	E1BUF4	XP_415231	XM_415231
CABLES1	Cdk5 and Abl enzyme substrate 1	768914	F1NSZ8	XP_001232075	XM_001232074
CABLES2	Cdk5 and Abl enzyme substrate 2	419229	---	XP_417406	XM_417406
CABP1	calcium binding protein 1	770178	E1C5X0; F1P428	XP_001233509	XM_001233508
CABP4	calcium binding protein 4	429967	---	XP_427524	XM_427524
CABP7	calcium binding protein 7	770960	F1NIG9	XP_001234278	XM_001234277
CABYR	calcium binding tyrosine-(Y)-phosphorylation regulated	421078	---	XP_419164	XM_419164
CACFD1	Calcium channel flower domain containing 1	417151	E1BQQ3	XP_415434	XM_415434
CACHD1	cache domain containing 1	424693	---	XP_422524	XM_422524
CACNA1B	Calcium channel, voltage-dependent, N type, alpha 1B subunit	374169	F1NXH0; F1NXI1; F1NY19; F1NY21; F1NY22; F1NY24; F1NZD4; F1NZD8; F1NZD9; F1NZE0; F1P3L0; F1P3L1; O73706; Q9PTN4; Q9PUM3; Q9PUM4; Q9PUM5; Q9PUM6; Q9PW44; Q9PW45; Q9PW46; Q9PW47	NP_989624	NM_204293
CACNA1C	calcium channel, voltage-dependent, L type, alpha 1C subunit	395891	F1N8M6; F1NJP7; F1NJQ0; O73707	XP_416388	XM_416388
CACNA1D	calcium channel, voltage-dependent, L type, alpha 1D subunit	395895	O73700	NP_990365	NM_205034
CACNA1E	calcium channel, voltage-dependent, R type, alpha 1E subunit	424412	F1NDV2; F1NFD2; F1NFD4	XP_422255	XM_422255
CACNA1G	calcium channel, voltage-dependent, T type, alpha 1G subunit	769385	F1NAS7; F1NKQ9	XP_001232654	XM_001232653
CACNA1H	calcium channel, voltage-dependent, T type, alpha 1H subunit	416526	---	XP_414830	XM_414830
CACNA1I	calcium channel, voltage-dependent, T type, alpha 1I subunit	427900	F1NF70	XP_425474	XM_425474
CACNA1S	calcium channel, voltage-dependent, L type, alpha 1S subunit	395985	F1N9I0; O42398	XP_419259	XM_419259
CACNA2D1	calcium channel, voltage-dependent, alpha 2/delta subunit 1	768444	E1BST5; E1BST6; E1BYM4	NP_001170793	NM_001177322
CACNA2D2	calcium channel, voltage-dependent, alpha 2/delta subunit 2	430150	---	XP_427707	XM_427707
CACNA2D3	calcium channel, voltage-dependent, alpha 2/delta subunit 3	415996	F1N8D0; F1NX89	XP_414338	XM_414338
CACNA2D4	calcium channel, voltage-dependent, alpha 2/delta subunit 4	100858946	F1NJQ3; F1NL67	XP_003640465	XM_003640417
CACNB2	calcium channel, voltage-dependent, beta 2 subunit	428420	E1BZF6	XP_425981	XM_425981
CACNB4	calcium channel, voltage-dependent, beta 4 subunit	374259	Q804I4; Q804I5	NP_001001733; NP_989675	NM_001001733; NM_204344
CACNG1	calcium channel, voltage-dependent, gamma subunit 1	417428	F1NC88	XP_003642395	XM_003642347
CACNG2	calcium channel, voltage-dependent, gamma subunit 2	427909	E1C6N3	XP_425482	XM_425482
CACNG3	calcium channel, voltage-dependent, gamma subunit 3	395378	Q98UH4	NP_989991	NM_204660
CACNG4	calcium channel, voltage-dependent, gamma subunit 4	373924	E1BRX9; F1NC80; Q90X18	NP_989463	NM_204132
CACNG7	calcium channel, voltage-dependent, gamma subunit 7	417429	E1C4A6	XP_415681	XM_415681
CACTIN	cactin, spliceosome C complex subunit	420073	---	XP_418192	XM_418192
CACYBP	calcyclin binding protein	424437	E1BQN9	XP_422279	XM_422279
CAD	carbamoyl-phosphate synthetase 2, aspartate transcarbamylase, and dihydroorotase	428659	---	XP_003641116	XM_003641068
CADM1	cell adhesion molecule 1	419762	---	XP_417901	XM_417901
CADM2	cell adhesion molecule 2	418463	F1NGH9; F1NR62	XP_416672	XM_416672
CADPS	Ca++-dependent secretion activator	416075	E1C0J6; E1C709; E1C710; E1C711	XP_001233835; XP_001233869; XP_001233908; XP_003642077; XP_003642078; XP_414412	XM_001233834; XM_001233868; XM_001233907; XM_003642029; XM_003642030; XM_414412
CADPS2	Ca++-dependent secretion activator 2	417756	E1BSW3; E1BY53; F1NKU1; F1NQ99	XP_003640394	XM_003640346
CALB1	Calbindin 1, 28kDa	396519	B0LY48; P04354; Q29SE4	NP_990844	NM_205513
CALB2	calbindin 2, 29kDa (calretinin)	396255	E1C192; P07090	NP_990647	NM_205316
CALCA	calcitonin-related polypeptide alpha	396256	B0FYW9; F1NB12; F1NFK9; P07660; P10286; Q9W6Z3	XP_420997	XM_420997
CALCOCO2	calcium binding and coiled-coil domain 2	419993	---	XP_418115	XM_418115
CALCR	calcitonin receptor	428425	F1NH61; F1P5E1	XP_425985	XM_425985
CALCRL	calcitonin receptor-like	423990	C5HV42	NP_001157122	NM_001163650
CALD1	caldesmon 1	373965	P12957	NP_989489	NM_204158
CALHM1	calcium homeostasis modulator 1	428977	F1P3T5	XP_426534	XM_426534
CALHM2	calcium homeostasis modulator 2	770753	E1C257	XP_001234076	XM_001234075
CALHM3	calcium homeostasis modulator 3	428978	E1C247	XP_426535	XM_426535
CALM; CALM1	calmodulin 2 (phosphorylase kinase, delta); calmodulin 1 (phosphorylase kinase, delta)	395855; 396523	O93410; P05419; P62149	NP_001103834; NP_990336	NM_001110364; NM_205005
CALM1	calmodulin 1 (phosphorylase kinase, delta)	396523	P05419	NP_001103834	NM_001110364
CALML3	calmodulin-like 3	416692	F1P3R4; F1P596	NP_001075166	NM_001081697; XR_139975
CALML4	calmodulin-like 4	427515	F1NRU7	XP_425089	XM_425089
CALN1	calneuron 1	417479	F1P5S2	XP_415727	XM_415727
CALR3	calreticulin 3	420146	F1P2G1	XP_418262	XM_418262
CAMK1G	calcium/calmodulin-dependent protein kinase IG	419859	E1BQ82	XP_417986	XM_417986
CAMK2A	calcium/calmodulin-dependent protein kinase II alpha	374175	O93559; Q9YHB8	NP_989626	NM_204295
CAMK2B	calcium/calmodulin-dependent protein kinase II beta	374174	O93560	NP_989625	NM_204294
CAMK2D	Calcium/calmodulin-dependent protein kinase II delta	422688	E1C3I7; F1NG22; Q5ZKI0	NP_001034389	NM_001039300
CAMK2G	calcium/calmodulin-dependent protein kinase II gamma	423737	---	XP_421612	XM_421612
CAMK4	calcium/calmodulin-dependent protein kinase IV	723973	---	NP_001029985	NM_001034813
CAMKK1	calcium/calmodulin-dependent protein kinase kinase 1, alpha	771003	---	XP_001234325	XM_001234324
CAMKMT	Calmodulin-lysine N-methyltransferase	421406	F1NG61; F1NX49	XP_419462	XM_419462
CAMLG	calcium modulating ligand	395808	F1NXG7; Q90700	NP_990293	NM_204962
CAMSAP1	calmodulin regulated spectrin-associated protein 1	417127	---	XP_415410	XM_415410
CAMSAP1L1	Calmodulin regulated spectrin-associated protein 1-like 1	424345	---	XP_422188	XM_422188
CAMTA1	calmodulin binding transcription activator 1	419369	---	XP_417530	XM_417530
CAND1	cullin-associated and neddylation-dissociated 1	417837	F1NHL2	XP_003640400; XP_416078	XM_003640352; XM_416078
CAND2	cullin-associated and neddylation-dissociated 2 (putative)	416121	---	XP_003642063; XP_414452	XM_003642015; XM_414452
CANT1	calcium activated nucleotidase 1	430103	F1NLP1; Q5ZJN6	NP_001026752	NM_001031581
CANX	Calnexin	416288	E1C2S5; E1C8M9; F1P2L1; Q5ZMF5	NP_001025791	NM_001030620
CAP1	CAP, adenylate cyclase-associated protein 1 (yeast)	419680	---	XP_003642632	XM_003642584
CAP2	CAP, adenylate cyclase-associated protein, 2 (yeast)	420847	E1BZ03	XP_418936	XM_418936
CAPN1	calpain 1, (mu/I) large subunit	693249	O42133	NP_001038137	NM_001044672
CAPN10	calpain 10	424945	E1BQW5	XP_422752	XM_422752
CAPN13	calpain 13	421304	E1BRR5	XP_419369	XM_419369
CAPN13; CAPN14; LOC100858435	calpain 13; calpain 14; calpain-13-like	100858435; 421304; 768684	E1BRR5; F1NGQ0	XP_001231758; XP_003640953; XP_419369	XM_001231757; XM_003640905; XM_419369
CAPN2	calpain 2, (m/II) large subunit	395963	B6V3H8; E1BR22; F1P0M7; Q92178	NP_990411	NM_205080
CAPN3	calpain 3, (p94)	423233	B6V3H9; B8Y8S8; F1NGY3; F1NJ45; Q92177	NP_001004405	NM_001004405
CAPN5	calpain 5	419086	E1C292	XP_417278	XM_417278
CAPN6	calpain 6	422341	E1C312	XP_420313	XM_420313
CAPN7	calpain 7	420683	E1BY84	XP_418783	XM_418783
CAPN8	calpain 8	428561	F1P052	XP_426117	XM_426117
CAPN9	calpain 9	421544	E1C6M3	XP_003641039; XP_419585	XM_003640991; XM_419585
CAPRIN1	cell cycle associated protein 1	426151	E1C9K3; Q5XNV3	NP_001026536	NM_001031365
CAPRIN2	caprin family member 2	418141	E1C221	XP_416372	XM_416372
CAPS2	calcyphosine 2	417859	---	XP_416102	XM_416102
CAPSL	Calcyphosine-like	426055	---	XP_001232405	XM_001232404
CAPZA1	capping protein (actin filament) muscle Z-line, alpha 1	396521	E1BXA2; P13127; Q5ZLP3	NP_990846	NM_205515
CAPZA2	capping protein (actin filament) muscle Z-line, alpha 2	417771	A0M8U0; F1NFP1; P28497	NP_001004380	NM_001004380
CAPZA3	capping protein (actin filament) muscle Z-line, alpha 3	427929	E1BUP3	XP_425501	XM_425501
CAPZB	capping protein (actin filament) muscle Z-line, beta	396418	F2Z4M9; P14315	NP_001167000; NP_990768	NM_001173529; NM_205437
CARD11	caspase recruitment domain family, member 11	416476	F1NRV3; Q5F3W0; Q5ZHR8	NP_001006161	NM_001006161
CARHSP1	calcium regulated heat stable protein 1, 24kDa	416640	E1C8P8	XP_414938	XM_414938
CARKD; LOC418756	carbohydrate kinase domain containing; uncharacterized LOC418756	418755; 418756	E1BZX7; F1P2P4	XP_416954; XP_429604	XM_416954; XM_429604
CARS	cysteinyl-tRNA synthetase	423086	F1P1D9; F1P1E0; Q5F408	NP_001012601	NM_001012583
CARS2	cysteinyl-tRNA synthetase 2, mitochondrial (putative)	418757	F1P2P3	XP_416955	XM_416955
CASC1	cancer susceptibility candidate 1	418206	---	XP_416435	XM_416435
CASC3	cancer susceptibility candidate 3	426135	H9L065	XP_423806	XM_423806
CASC4	Cancer susceptibility candidate 4	415575	F1NDU0; Q5ZKQ5	NP_001025727	NM_001030556
CASD1	CAS1 domain containing 1	420565	F1NZ82; Q5F3K8	XP_001235382	NM_001030976; XM_001235381
CASK	calcium/calmodulin-dependent serine protein kinase (MAGUK family)	418565	E1BWL4	XP_416769	XM_416769
CASKIN1	CASK interacting protein 1	416556	F1N9H2	XP_414857	XM_414857
CASKIN2	CASK interacting protein 2	422125	E1C2D3	XP_420128	XM_420128
CASP1	caspase 1, apoptosis-related cysteine peptidase	395764	F1NVV5; F1P0X7; O42284	XP_003642432	NM_204924; XM_003642384
CASP10	caspase 10, apoptosis-related cysteine peptidase	424081	F1P102	XP_421936	XM_421936
CASP14	caspase 14, apoptosis-related cysteine peptidase	776274	A9YDV3; A9YDV4; H9L0J0	NP_001106764	NM_001113293; XR_140403
CASP18	initiator caspase	693266	A9YDV6; E1BQS1; Q4JQQ0	NP_001038154	NM_001044689
CASP2	caspase 2, apoptosis-related cysteine peptidase	395857	D2XQ58; F1NAK9; F1NP15; Q98943	NP_001161173	NM_001167701
CASP3	caspase 3, apoptosis-related cysteine peptidase	395476	D2XQ57; O93417	NP_990056	NM_204725
CASP6	Caspase 6, apoptosis-related cysteine peptidase	395477	D2XQ56; F1NEL6; O93415	NP_990057	NM_204726
CASP7	caspase 7, apoptosis-related cysteine peptidase	423901	F1NV61	XP_421764	XM_421764
CASP8	caspase 8, apoptosis-related cysteine peptidase	395284	F1NXP6; Q90WU1	NP_989923	NM_204592
CASP8AP2	caspase 8 associated protein 2	421810	E1BZQ5	XP_419834	XM_419834
CASP9	caspase 9, apoptosis-related cysteine peptidase	426970	D2XQ43; F1NL59; F1NSP9; Q90WU0	XP_424580	XM_424580
CASQ2	calsequestrin 2 (cardiac muscle)	395198	F1NQT9; F1NSU9; P19204	NP_989857	NM_204526
CASR	calcium-sensing receptor; Casr-rs5	418266	Q5TLZ3	XP_416491; XP_427248	XM_416491; XM_427248
CASR; LOC429693	calcium-sensing receptor; extracellular calcium-sensing receptor-like	418266; 429693	F1NHH3; Q5TLZ3	XP_416491; XP_427248	XM_416491; XM_427248
CASS4	Cas scaffolding protein family member 4	419330	E1C3S5	XP_417499	XM_417499
CAST	calpastatin	427121	A4ZZ64; B6V3I0	NP_001131122	NM_001137650
CASZ1	castor zinc finger 1	419452	E1BSR2; F1NC41	XP_417611	XM_417611
CAT	catalase	423600; 769804	F1NGJ7; F1NZ27; Q5ZL24; Q5ZMM4	NP_001026386; XP_001233111	NM_001031215; XM_001233110
CATHL3	cathelicidin antimicrobial peptide	414337	C4PFJ7; C4PFJ9; Q2IAL6; Q6QLQ5	NP_001001605	NM_001001605
CAV1	caveolin 1, caveolae protein, 22kDa	373996	F1NTW2; F1P039; P35431	NP_001099134	NM_001105664
CAV2	caveolin 2	417772	F1P026	NP_001007087	NM_001007086
CAV3	caveolin 3	378796	F1NXR1; Q6URC6	NP_989701	NM_204370
CBFA2T2	core-binding factor, runt domain, alpha subunit 2; translocated to, 2	419155	F1NBC4; F1P2I8; F1P2I9; Q5IJ73	NP_001011689	NM_001011689
CBFA2T3	Core-binding factor, runt domain, alpha subunit 2; translocated to, 3	415846	Q5F3B1	NP_001025751	NM_001030580
CBFB	Core-binding factor, beta subunit	395257	Q5ZM50; Q8QGE8	NP_989901	NM_204570
CBL	Cas-Br-M (murine) ecotropic retroviral transforming sequence	374038	E1C6M5; F1NIK2; F1NXW5; Q98TY6	NP_989539	NM_204208
CBL; UBE4A	Cas-Br-M (murine) ecotropic retroviral transforming sequence; ubiquitination factor E4A	374038; 419758	E1C6M5; F1NIK2; F1NXW5; Q5ZKF7; Q98TY6	NP_001026081; NP_989539	NM_001030910; NM_204208
CBLB	Cas-Br-M (murine) ecotropic retroviral transforming sequence b	418406	F1NL77	XP_416621	XM_416621
CBLL1	Cbl proto-oncogene, E3 ubiquitin protein ligase-like 1	417701	Q5ZHZ4	NP_001007849	NM_001007848
CBLN1	cerebellin 1 precursor	771265	F1NC91	---	---
CBLN2	cerebellin 2	421019	D2XJ63	NP_001165239	NM_001171768
CBLN4	cerebellin 4 precursor	769254	Q5ZI01	NP_001072955	NM_001079487
CBR1	carbonyl reductase 1	418512	F1N8Y3; F1P2X1; Q4JK63	NP_001025966	NM_001030795
CBR4	Carbonyl reductase 4	422435	---	XP_420403	XM_420403
CBS	cystathionine-beta-synthase	418545	E1BYG4	XP_416752	XM_416752
CBWD1	COBW domain containing 1	427347	E1C3Z5; F1NAT4; Q5ZK54	NP_001026607	NM_001031436
CBX1	chromobox homolog 1	374237	H9L191; O93480	NP_989663	NM_204332
CBX2	chromobox homolog 2	426248	---	XP_423911	XM_423911
CBX3	chromobox homolog 3	395355	F1ND82; O93481	NP_989974	NM_204643
CBX4	chromobox homolog 4	395354	F1NEW9; O93482	NP_989973	NM_204642
CBX7	chromobox homolog 7	418017	F1NE43	---	XR_027064
CBX8	chromobox homolog 8	422084	---	XP_001231757	XM_001231756
CBY1	chibby homolog 1 (Drosophila)	771364	E1BT07	XP_001234193	XM_001234192
CC2D1B	coiled-coil and C2 domain containing 1B	772226	E1C6S7	XP_001235393	XM_001235392
CC2D2A	Coiled-coil and C2 domain containing 2A	422830	E1C8X3; E1C8X4	XP_420777	XM_420777
CCAR1	Cell division cycle and apoptosis regulator 1	423692	Q5ZL41	XP_421573	XM_421573
CCBE1	collagen and calcium binding EGF domains 1	770043	F1NH74	XP_001233358	XM_001233357
CCBL1	cysteine conjugate-beta lyase, cytoplasmic	417202	E1BXL5	XP_003642330; XP_415485	XM_003642282; XM_415485
CCBL2	cysteine conjugate-beta lyase 2	424517	---	XP_422355	XM_422355
CCBP2	chemokine binding protein 2	420393	F1P1U9	XP_418499	XM_418499
CCDC101	Coiled-coil domain containing 101	424726	Q5ZL38	NP_001026469	NM_001031298
CCDC102A	coiled-coil domain containing 102A	427528	---	XP_003641931	XM_003641883
CCDC103	coiled-coil domain containing 103	419970	---	XP_418092	XM_418092
CCDC104	coiled-coil domain containing 104	421209	E1C1K4	NP_001186352	NM_001199423
CCDC107	coiled-coil domain containing 107	417860	E1C1U7	XP_429533	XM_429533
CCDC108	coiled-coil domain containing 108	424206	---	XP_422054	XM_422054
CCDC109B	Coiled-coil domain containing 109B	422698	---	XP_420651	XM_420651
CCDC111	Coiled-coil domain containing 111	422549	E1BS13; F1NUV1; Q5F3K7	NP_001026308	NM_001031137
CCDC112	coiled-coil domain containing 112	770644	E1C8C1; F1NKM2	XP_003643151	XM_003643103
CCDC113	coiled-coil domain containing 113	768642	E1C7B7	XP_001231696	XM_001231695
CCDC117	coiled-coil domain containing 117	416917	F1N8K2	XP_003642256	XM_003642208
CCDC12	coiled-coil domain containing 12	420402	Q5ZK34	NP_001006353	NM_001006353
CCDC122	coiled-coil domain containing 122	428068	F1NXE0	XP_425626	XM_425626
CCDC124	coiled-coil domain containing 124	427087	H9KZ31	XP_424681	XM_424681
CCDC125	coiled-coil domain containing 125	427313	F1NC52	XP_424893	XM_424893
CCDC126	coiled-coil domain containing 126	420619	E1BS45	XP_003640728	XM_003640680
CCDC127	coiled-coil domain containing 127	420970	F1NPJ3; Q5ZIN7	NP_001026177	NM_001031006
CCDC13	coiled-coil domain containing 13	420392	E1C1C7	XP_001232698	XM_001232697
CCDC132	coiled-coil domain containing 132	420560	F1NDR7; Q5ZKV9	NP_001012872	NM_001012854
CCDC134	coiled-coil domain containing 134	417984	E1BVM7	XP_003640423; XP_416223	XM_003640375; XM_416223
CCDC135	coiled-coil domain containing 135	427527	E1BQT1	XP_425101	XM_425101
CCDC137	coiled-coil domain containing 137	417454	---	XP_415702	XM_415702
CCDC14	coiled-coil domain containing 14	424252	F1NQ68	XP_422100	XM_422100
CCDC141	coiled-coil domain containing 141	770766	---	XP_001234093	XM_001234092
CCDC146	coiled-coil domain containing 146	417723	E1BQW6	XP_415968	XM_415968
CCDC147	Coiled-coil domain containing 147	423882	---	XP_421748	XM_421748
CCDC148	coiled-coil domain containing 148	424327	E1C641	XP_422172	XM_422172
CCDC149; LGI2	coiled-coil domain containing 149; leucine-rich repeat LGI family, member 2	100858889; 422809	F1N882; F1NHJ0; Q1EGJ7	NP_001244245; XP_003641266; XP_003641267	NM_001257316; XM_003641218; XM_003641219
CCDC15	coiled-coil domain containing 15	419705	E1BYI4; E1C3T4; F1NL53	XP_417850	XM_417850
CCDC157	coiled-coil domain containing 157	417010	F1NJ21	XP_415300	XM_415300
CCDC164	coiled-coil domain containing 164	422009	F1NGP0	XP_420016	XM_420016
CCDC165	coiled-coil domain containing 165	426050	---	XP_423729	XM_423729
CCDC167	coiled-coil domain containing 167	421433	F1NAT1	XP_419485	XM_419485
CCDC17	coiled-coil domain containing 17	424601	E1C981	XP_430163	XM_430163
CCDC170	coiled-coil domain containing 170	421639	F1NN95	XP_419678	XM_419678
CCDC171	coiled-coil domain containing 171	427242	F1NKN7	XP_003643043	XM_003642995
CCDC18	Coiled-coil domain containing 18	424497	E1C0J0; F1NAS4	NP_001238963	NM_001252034
CCDC19	coiled-coil domain containing 19	426452	---	XP_424097	XM_424097
CCDC28A	coiled-coil domain containing 28A	421679	E1BZ94	XP_419716	XM_419716
CCDC28B	coiled-coil domain containing 28B	419647	---	XP_003642619	XM_003642571
CCDC3	coiled-coil domain containing 3	769832	---	XP_003640381	XM_003640333
CCDC30	coiled-coil domain containing 30	419508	E1BXE9	XP_417659	XM_417659
CCDC34	coiled-coil domain containing 34	421609	F1NEL1; F1NWQ3; Q5ZHX8	XP_003641332	NM_001031068; XM_003641284
CCDC37	coiled-coil domain containing 37	427589	F1NW67	XP_425162	XM_425162
CCDC39	coiled-coil domain containing 39	424969	---	XP_422777	XM_422777
CCDC40	Coiled-coil domain containing 40	422083	E1C9D7	XP_420086	XM_420086
CCDC41	coiled-coil domain containing 41	417904	E1BZA0	XP_416146	XM_416146
CCDC42	coiled-coil domain containing 42	417318	E1BSW4	XP_415587	XM_415587
CCDC43	coiled-coil domain containing 43	419971	F1P109; Q5ZK95	NP_001007885	NM_001007884
CCDC47	coiled-coil domain containing 47	419958	---	XP_418080	XM_418080
CCDC48	coiled-coil domain containing 48	415972	E1BSB4	XP_414315	XM_414315
CCDC50	coiled-coil domain containing 50	424906	Q5ZM86	NP_001026486	NM_001031315
CCDC50; PSMD6	coiled-coil domain containing 50; proteasome (prosome, macropain) 26S subunit, non-ATPase, 6	416079; 424906	F1N903; Q5ZM86	NP_001026486; XP_414416	NM_001031315; XM_414416
CCDC51	coiled-coil domain containing 51	416045	F1NZC4	XP_414385	XM_414385
CCDC53	coiled-coil domain containing 53	418094	E1BYD1	XP_416327	XM_416327
CCDC56	coiled-coil domain containing 56	772251	E1C7Z7	XP_001234221	XM_001234220
CCDC57	coiled-coil domain containing 57	417379	E1BWY0; F1N8C0	XP_415635	XM_415635
CCDC58	coiled-coil domain containing 58	418269	E1C189	XP_416494	XM_416494
CCDC59	coiled-coil domain containing 59	417878	F1NPR0	XP_416121	XM_416121
CCDC6	coiled-coil domain containing 6	423666	E1BRG8; F1NQP8; Q5F443	NP_001026392	NM_001031221
CCDC60	coiled-coil domain containing 60	416987	E1BS04; E1C6W2	XP_415279	XM_415279
CCDC61	coiled-coil domain containing 61	424880	E1BW19; Q5ZJ07	NP_001006546	NM_001006546
CCDC63	coiled-coil domain containing 63	416873	E1BQI9	XP_415165	XM_415165
CCDC66	coiled-coil domain containing 66	415997	---	XP_414339	XM_414339
CCDC67	coiled-coil domain containing 67	419006	E1C8U6	XP_417199	XM_417199
CCDC69	coiled-coil domain containing 69	416268	---	XP_414586	XM_414586
CCDC73	coiled-coil domain containing 73	421601	---	XP_419638	XM_419638
CCDC75	coiled-coil domain containing 75	421468	E1C8L8	XP_003641029; XP_419517	XM_003640981; XM_419517
CCDC76	Coiled-coil domain containing 76	424470	F1P1W7	XP_422313	XM_422313
CCDC77	coiled-coil domain containing 77	418149	E1BQS8	XP_416380	XM_416380
CCDC78	coiled-coil domain containing 78	769634	---	XP_001232922	XM_001232921
CCDC79	coiled-coil domain containing 79	769532	---	XP_001232198	XM_001232197
CCDC79; MIR1634	coiled-coil domain containing 79; microRNA mir-1634	100315754; 769532	---	XP_001232198	NR_035123; XM_001232197
CCDC80	coiled-coil domain containing 80	395074	F1NTI1; Q8AXP2	NP_989762	NM_204431
CCDC81	coiled-coil domain containing 81	431499	H9L026; Q5F3P9	NP_001026777	NM_001031606
CCDC82	coiled-coil domain containing 82	426136	F1NG16; F1NPV4	XP_423807	XM_423807
CCDC83	coiled-coil domain containing 83	425232	E1BZE7	XP_423016	XM_423016
CCDC84	Coiled-coil domain containing 84	419787	E1C5K8	XP_417924	XM_417924
CCDC85C	coiled-coil domain containing 85C	423447	E1C6L0	XP_421357	XM_421357
CCDC86	coiled-coil domain containing 86	425097	Q6SVA7	XP_003641321	XM_003641273
CCDC88A	coiled-coil domain containing 88A	421210	---	XP_003640926; XP_419285	XM_003640878; XM_419285
CCDC88C	coiled-coil domain containing 88C	423410	E1C294; F1NQI1	XP_421320	XM_421320
CCDC89	coiled-coil domain containing 89	426393	F1P1Y3	XP_424044	XM_424044
CCDC90A	coiled-coil domain containing 90A	420837	E1BZ36	XP_418928	XM_418928
CCDC90B	Coiled-coil domain containing 90B	419023	---	XP_417216	XM_417216
CCDC91	coiled-coil domain containing 91	419045	---	XP_417236	XM_417236
CCDC92	coiled-coil domain containing 92	416817	F1N9Y7; F1NGA3; F1NGA4	XP_415108	XM_415108
CCDC93	coiled-coil domain containing 93	424277	F1NF62; Q5ZKI4	NP_001026433	NM_001031262
CCDC99	coiled-coil domain containing 99	416172	E1BW90	XP_414505	XM_414505
CCK	cholecystokinin	414884	F1NIG8; Q9PU41	NP_001001741	NM_001001741
CCKAR	cholecystokinin A receptor	422801	A0ZPS0; F1NIK5	NP_001074970	NM_001081501
CCKBR	cholecystokinin B receptor	414885	F1NP96; Q7T1P8	NP_001001742	NM_001001742
CCL1	chemokine (C-C motif) ligand 1	395552	F1P167; Q90825	NP_990107	NM_204776
CCL17	chemokine (C-C motif) ligand 17	415652	E1BSY1	XP_414018	XM_414018
CCL19	chemokine (C-C motif) ligand 19	427406	H9KZC4	XP_424980	XM_424980
CCL20	chemokine (C-C motif) ligand 20	395082	Q8QG55	NP_989769	NM_204438
CCL4; CCL5	chemokine (C-C motif) ligand 4; chemokine (C-C motif) ligand 5	395551; 417465	Q90826	NP_001025531; NP_001039297	NM_001030360; NM_001045832
CCL4; GGCL1	chemokine (C-C motif) ligand 4; chemokine-like ligand 1	395468; 417464	E1C2Y5; F1ND47; F1NVW2; F1P5Z3; Q4KS30; Q9I8E0	NP_001039296; NP_990051	NM_001045831; NM_204720
CCLI5	chemokine	417533	G4U4L7	XP_415779	XM_415779
CCM2	cerebral cavernous malformation 2	420410	E1C144	NP_001184073	NM_001197144
CCNA1	cyclin A1	418901	F1P4N0	XP_417097	XM_417097
CCNA2	cyclin A2	396172	F1NJI2; F1NQG1; P43449	NP_990575	NM_205244
CCNB2	cyclin B2	415400	F1P2B4; P29332	NP_001004369	NM_001004369
CCNB3	cyclin B3	396167	P39963	NP_990570	NM_205239
CCNC	cyclin C	421791	F1NTI7; P55168; Q5ZMC4; Q788V6; Q90695; Q91031	NP_001161237	NM_001167765
CCND1	cyclin D1	396341	F1NS84; P55169	NP_990712	NM_205381
CCND2	cyclin D2	374047	F1NTF0; P49706	NP_989544	NM_204213
CCND3	Cyclin D3	419928	Q5ZKI9	NP_001008453	NM_001008453
CCNDBP1	cyclin D-type binding-protein 1	419217	---	XP_003642530; XP_417394	XM_003642482; XM_417394
CCNE1	cyclin E1	426117	F1NQ71; P49707	NP_001026529	NM_001031358
CCNE2	cyclin E2	420231	F1P3N8; Q5ZMH4	NP_001026116	NM_001030945
CCNF	cyclin F	416749	F1NEX9	XP_415043	XM_415043
CCNG1	cyclin G1	416161	E1BUH6	XP_003642095; XP_414493	XM_003642047; XM_414493
CCNG2	cyclin G2	422512	---	XP_420475	XM_420475
CCNH	cyclin H	427328	E1C948	XP_424908	XM_424908
CCNI	cyclin I	422634	---	XP_420590	XM_420590
CCNI2	cyclin I family, member 2	771567	E1BSR8	XP_001234830	XM_001234829
CCNJ	cyclin J	423821	---	XP_003641566; XP_421691	XM_003641518; XM_421691
CCNJL	cyclin J-like	416155	---	XP_414487	XM_414487
CCNK	cyclin K	423446	F1NCA1; Q5ZL28	NP_001026380	NM_001031209
CCNL1	Cyclin L1	425024	---	XP_422826	XM_422826
CCNL2	cyclin L2	395124	F1NPF6; Q5ZJP9; Q7T061	NP_989801	NM_204470
CCNRC01; PCDHAC1	cadherin-related neuronal receptor c01; protocadherin alpha subfamily C, 1	497223; 768577	F1N948; F1N949; Q6R0H9	NP_001104600; XP_001231600	NM_001111130; XM_001231599
CCNT2	cyclin T2	424289	---	XP_422134	XM_422134
CCNY	cyclin Y	428412	F1N852	XP_425973	XM_425973
CCNYL1	Cyclin Y-like 1	424093	---	XP_421948	XM_421948
CCP110	centriolar coiled coil protein 110kDa	416613	F1NHK0	XP_003642172; XP_414915	XM_003642124; XM_414915
CCPG1	cell cycle progression 1	427496	Q5ZM60	NP_001026626	NM_001031455
CCR2	chemokine (C-C motif) receptor 2	420696	F1NPK8; F1NPK9	NP_001039300	NM_001045835
CCR4	chemokine (C-C motif) receptor 4	428457	F1NIF4	XP_426017	XM_426017
CCR6	chemokine (C-C motif) receptor 6	769278	B0BL89; F1NPD4	NP_001107553	NM_001114081
CCR7	chemokine (C-C motif) receptor 7	428315	E3VW39; F1NC99	NP_001185681	NM_001198752
CCR8	chemokine (C-C motif) receptor 8	420718	F1NIF5; Q5ZI02	NP_001026162	NM_001030991
CCR8-L	C-C chemokine receptor 8 like	776400	F1NPK7	NP_001074363	NM_001080894
CCR9	chemokine (C-C motif) receptor 9	428454	F1NMB1	NP_001039305	NM_001045840
CCRN4L	CCR4 carbon catabolite repression 4-like (S. cerevisiae)	404779	F1NVT2; Q71H64	NP_001009928	NM_001009928
CCT2	chaperonin containing TCP1, subunit 2 (beta)	417846	Q5F424	NP_001012551	NM_001012533
CCT4	chaperonin containing TCP1, subunit 4 (delta)	395414	F1NPG8; Q5ZMG3; Q9I8D6	NP_996761	NM_206878
CCT5	chaperonin containing TCP1, subunit 5 (epsilon)	420930	F1NKN0; Q5F411	NP_001012581	NM_001012563
CCT6A	chaperonin containing TCP1, subunit 6A (zeta 1)	417541	F1NWH9; Q5ZJ54	NP_001006216	NM_001006216
CCT7	chaperonin containing TCP1, subunit 7 (eta)	428806	F1NZN1; Q5ZJK8	NP_001026712	NM_001031541
CCT8	Chaperonin containing TCP1, subunit 8 (theta)	418486	F1NEF2; F1P1N9; Q6EE31	NP_001004389	NM_001004389
CCZ1	CCZ1 vacuolar protein trafficking and biogenesis associated homolog (S. cerevisiae)	416433	F1NPX4; Q5ZLN2	NP_001006158	NM_001006158
CD101	CD101 molecule	418450	---	XP_416661	XM_416661
CD109	CD109 molecule	421862	F1NX20; F1NX21	XP_419879	XM_419879
CD151	CD151 molecule (Raph blood group)	423105	Q5ZII8	NP_001006472	NM_001006472
CD163	CD163 molecule	418303	---	XP_416526	XM_416526
CD163L1	CD163 molecule-like 1	429000	F1NV85	XP_426557	XM_426557
CD164	CD164 molecule, sialomucin	395380	F1NRA0; F1NRC5; F1NST5; F1NST6; Q98TQ9	XP_426183	XM_426183
CD180	CD180 molecule	431584	E1BRV3	XP_003642957	XM_003642909
CD1B	CD1b molecule	425802	Q4ADW0; Q4ADW1; Q52Z74; Q52Z75; Q5GL29	NP_001019753	NM_001024582
CD1C	CD1c molecule	425801	F1N9F9; Q4ADW1; Q52Z75; Q58S63; Q58S64; Q58S65; Q58S66; Q58S67; Q58S68; Q58S69	NP_001017412	NM_001017412
CD2	CD2 molecule	768858	F1NTD8	XP_001232013	XM_001232012
CD200	CD200 molecule	418425	Q5ZKJ6	NP_001025958	NM_001030787
CD200R1	CD200 receptor 1	768673	E1C1K9; F1NPN8; F1NTI3; Q2YHT5; Q2YHT7	NP_001072952	NM_001079484
CD200R1L	CD200 receptor 1-like	418367	F1NPN8	NP_001025953	NM_001030782
CD226	CD226 molecule	772097	E1C1Z4	XP_001235285	XM_001235284
CD24	CD24 molecule	421780	---	XP_429881	XM_429881
CD244	CD244 molecule, natural killer cell receptor 2B4	425935	---	XP_003643429	XM_003643381
CD247	CD247 molecule	395911	E1C600	NP_996762	NM_206879
CD274	CD274 molecule	427224	E1C154	XP_424811	XM_424811
CD276	CD276 molecule	415315	F1NI56; F1NZF8	XP_413702	XM_413702
CD28	CD28 molecule	396249	P31043	NP_990642	NM_205311
CD2AP	CD2-associated protein	771715	Q5ZJW0	XP_003641109	XM_003641061
CD300A	CD300a molecule	422107	E1BS30; F1NTJ4; F1NZT9; Q2YHU0	NP_001034384	NM_001039295
CD300L-S1	CD300 antigen-like family member	769812	Q2YHT8	NP_001073213	NM_001079745
CD320	CD320 molecule	420066	Q5QHD9; Q5QHE0; Q6JBY7; Q6JBY8	NP_001038110	NM_001044645; XR_140339
CD34	CD34 molecule	419856	E1BUT3	XP_417984	XM_417984
CD36	CD36 molecule (thrombospondin receptor)	417730	F1NER9; Q2MJT5; Q5ZLI8	NP_001025902	NM_001030731
CD38	CD38 molecule	422827	E1C8Y0; E5G6H6	NP_001188317	NM_001201388
CD3D	CD3d molecule, delta (CD3-TCR complex)	396518	F1N9E2; Q6PVZ9; Q6PW00; Q90768	NP_990843	NM_205512
CD3E	CD3e molecule, epsilon (CD3-TCR complex)	396062	B3VMQ8; F1N9E3; P70069; Q98910	NP_996787	NM_206904
CD4	CD4 molecule	395362	A6XKD7; F1NGI9; Q3HR38; Q6Q4G0; Q6Q4G1; Q6Q4G2; Q9W6V7	NP_989980	NM_204649
CD40	CD40 molecule, TNF receptor superfamily member 5	395385	B6RCP8; E1C9I3; F1NNR7; Q9DDD2	NP_989996	NM_204665
CD40LG	CD40 ligand	395485	B6RCP9; F1P1F6; Q9I8D8	NP_990064	NM_204733
CD44	CD44 molecule (Indian blood group)	395666	F1NBU9; F1NL98; Q9W6S4	NP_990191	NM_204860
CD47	CD47 molecule	418408	F1NSJ5; Q5ZL65; Q6XFQ9; Q6XFR0; Q6XFR1	NP_001004388	NM_001004388
CD5	CD5 molecule	395757	F1NBC3; F1P4J9; O73906	NP_990252	NM_204921
CD55	CD55 molecule, decay accelerating factor for complement (Cromer blood group)	419852	E1C2T6	XP_417981	XM_417981
CD69; LOC425783	CD69 molecule; C-type lectin domain family 2 member D-like	417816; 425783	E1C721; H9KZ80; H9KZ93; H9KZA8; H9KZV1; Q09Y73	NP_001074183; XP_423496	NM_001080714; XM_423496
CD7	CD7 molecule	417346	E1BY91	XP_415610	XM_415610
CD72	CD72 molecule	395923	E1BVR4; E1BVR6; F1P4J8; Q788W1; Q90644	NP_990383	NM_205052
CD74	CD74 molecule, major histocompatibility complex, class II invariant chain	414741	E1BZH6; F1NYL5; Q6J613; Q6J614; Q6R7Z7; Q9BD54	NP_001001613	NM_001001613
CD79B	CD79b molecule, immunoglobulin-associated beta	419940	Q5ZLC0; Q8AV16	NP_001006328	NM_001006328
CD80	CD80 molecule	768950	B6RCQ0; F1NRV5; Q5F3J1	NP_001073207	NM_001079739
CD81	CD81 molecule	374256	F1NK68; F1NW06; Q5F3G3; Q805A8	NP_001025510	NM_001030339
CD82	CD82 molecule	423172	Q5ZKY7	NP_001008470	NM_001008470
CD83	CD83 molecule	420838	---	XP_418929	XM_418929
CD86	CD86 molecule	427944	Q3BKZ5	NP_001032928	NM_001037839
CD8A	CD8a molecule	403158	A6XKD5; B1PMA2; F1NK02; F1NXT4; F1P0X6; P79985; P79986; Q3HR39; Q6QR62; Q6QR63; Q6QR64; Q6QR65; Q6R133; Q90770	NP_990566	NM_205235
CD8B	CD8b molecule	396175	Q788N4; Q90769	NP_990578	NM_205247
CD9	CD9 molecule	395527	Q9IBC9	NP_990093	NM_204762
CD93	CD93 molecule	421234	E1BQ95	NP_001186380	NM_001199451
CD99	CD99 molecule	418662	E1BRC1	NP_001185580	NM_001198651
CD99L2	CD99 molecule-like 2	422386	F1NGN9	XP_420355	XM_420355
CDA	Cytidine deaminase	771849	E1C6V1	NP_001139516	NM_001146044
CDADC1	cytidine and dCMP deaminase domain containing 1	418864	---	XP_417059	XM_417059
CDAN1	congenital dyserythropoietic anemia, type I	423239	E1BYJ8	XP_421163	XM_421163
CDC123	cell division cycle 123 homolog (S. cerevisiae)	426366	E1BTR2	XP_424021	XM_424021
CDC14A	CDC14 cell division cycle 14 homolog A (S. cerevisiae)	424466	D5K9Y5; F1P209	NP_001171207	NM_001177736
CDC14B	CDC14 cell division cycle 14 homolog B (S. cerevisiae)	427473	D5K9Y4; F1NYF9	XP_425045	XM_425045
CDC16	cell division cycle 16 homolog (S. cerevisiae)	418735	F1P4A5; Q5ZIZ9	NP_001006265	NM_001006265
CDC20	cell division cycle 20 homolog (S. cerevisiae)	424563	Q5ZI36	NP_001006536	NM_001006536
CDC20B	cell division cycle 20 homolog B (S. cerevisiae)	426169	---	XP_423833	XM_423833
CDC23	cell division cycle 23 homolog (S. cerevisiae)	771857	F1NQ36	XP_003642151	XM_003642103
CDC25A	cell division cycle 25 homolog A (S. pombe)	420375	F1NEN0	NP_001186501	NM_001199572
CDC27	cell division cycle 27 homolog (S. cerevisiae)	419960	Q5ZK91	NP_001006331	NM_001006331
CDC2L1	cell division cycle 2-like 1 (PITSLRE proteins)	419406	E1BWQ7; F1NJL5; Q91013	NP_001026042	NM_001030871
CDC34	cell division cycle 34 homolog (S. cerevisiae)	425483	E1BW49	XP_423237	XM_423237
CDC37	cell division cycle 37 homolog (S. cerevisiae)	395430	O57476; Q90642; Q90653	NP_990025	NM_204694
CDC37L1	cell division cycle 37 homolog (S. cerevisiae)-like 1	426535	F1NH83	XP_424174	XM_424174
CDC40	cell division cycle 40 homolog (S. cerevisiae)	421760	F1NQ45; Q5ZLV3	NP_001006407	NM_001006407
CDC42	cell division cycle 42 (GTP binding protein, 25kDa)	395917	G1K300; Q90694	NP_990379	NM_205048
CDC42BPA	CDC42 binding protein kinase alpha (DMPK-like)	416746	E1BWT5; F1NUB2	NP_001186372	NM_001199443
CDC42BPB	CDC42 binding protein kinase beta (DMPK-like)	423473	---	XP_003641493; XP_003641494; XP_421380	XM_003641445; XM_003641446; XM_421380
CDC42EP1	CDC42 effector protein (Rho GTPase binding) 1	418040	---	XP_429544	XM_429544
CDC42EP2	CDC42 effector protein (Rho GTPase binding) 2	426985	---	XP_003643454	XM_003643406
CDC42EP4	CDC42 effector protein (Rho GTPase binding) 4	771509	E1BUR1	XP_001233620	XM_001233619
CDC42SE1	CDC42 small effector 1	100857323	Q5ZKB1	XP_003642732	XM_003642684
CDC42SE2	CDC42 small effector 2	768825	E1C6D3	XP_001231515; XP_003643064	XM_001231514; XM_003643016
CDC45	cell division cycle 45 homolog (S. cerevisiae)	416776	E1BYS7	XP_415070	XM_415070
CDC5L	CDC5 cell division cycle 5-like (S. pombe)	422052	E1BWQ5; E1C6A9	XP_420058	XM_420058
CDC7	cell division cycle 7 homolog (S. cerevisiae)	424507	F1NB13	XP_422347	XM_422347
CDC73	cell division cycle 73, Paf1/RNA polymerase II complex component, homolog (S. cerevisiae)	424356	Q5ZLM0	NP_001026436	NM_001031265
CDCA2	cell division cycle associated 2	419524	---	XP_417676	XM_417676
CDCA3	cell division cycle associated 3	770517	E1C8X5	XP_001232834	XM_001232833
CDCA4	cell division cycle associated 4	423500	F1NMS9; Q5ZL47	NP_001026383	NM_001031212
CDCA7	cell division cycle associated 7	425630; 776142	F1NLY4; H9KZM6	XP_001235692; XP_423365	XM_001235691; XM_423365
CDCA7L	cell division cycle associated 7-like	420608	F1NE36; Q5F343	NP_001026153	NM_001030982
CDCA8	cell division cycle associated 8	425084	H9L1X5	XP_422876	XM_422876
CDCP1	CUB domain containing protein 1	420703	F1NGT5	XP_418802	XM_418802
CDCP2	CUB domain containing protein 2	424658	F1NPU7	XP_422492	XM_422492
CDD	cytidine deaminase	395773	E1C6F9; F1P1D2; O93526	NP_990264	NM_204933
CDH1	cadherin 1, type 1, E-cadherin (epithelial)	415860	P08641; P33145	NP_001034347	NM_001039258
CDH1-A	Fizzy-related protein homolog	395297	H9KZ18; H9L1Y1; H9L1Y2; H9L1Y3; Q8UWJ6; Q8UWJ7	NP_001104310	NM_001110840
CDH1-A; FZR1	fizzy-related protein homolog; fizzy/cell division cycle 20 related 1 (Drosophila)	373959; 395297	H9KZ18; H9L1Y1; H9L1Y2; H9L1Y3; Q8UWJ6; Q8UWJ7; Q8UWJ8	NP_001104310; NP_989485	NM_001110840; NM_204154
CDH10	cadherin 10, type 2 (T2-cadherin)	408049	F1NQC1; P79995	NP_999838	NM_214673
CDH11	cadherin 11, type 2, OB-cadherin (osteoblast)	415797	F1P1Y0; O93319; Q9PWN0	NP_001004371	NM_001004371
CDH12	cadherin 12, type 2 (N-cadherin 2)	420912	E1C235	XP_418999	XM_418999
CDH13	cadherin 13, H-cadherin (heart)	414849	F1NNT5; F1NNT6; F1P5T8; P33150	NP_001001760	NM_001001760
CDH17	cadherin 17, LI cadherin (liver-intestine)	420225	E1BX79	NP_001186424	NM_001199495
CDH18	cadherin 18, type 2	428490	Q9YGQ7	XP_426046	XM_426046
CDH19	cadherin 19, type 2	421029	A6YJX3; F1NSW9; F1P1E2	NP_001093757	NM_001100287
CDH2	cadherin 2, type 1, N-cadherin (neuronal)	414745	P10288	NP_001001615	NM_001001615
CDH20	Cadherin 20, type 2	373927	E1C6Y4; Q8QGH3	NP_989465	NM_204134
CDH22	cadherin 22, type 2	419305	E1C3A7	XP_417477	XM_417477
CDH23	cadherin-related 23	423718	---	XP_421595	XM_421595
CDH3	cadherin 3, type 1, P-cadherin (placental)	414845	F1NNP4; P08641; P33145; Q5ZKM4	XP_003642004	XM_003641956
CDH4	cadherin 4, type 1, R-cadherin (retinal)	419222	F1NYV5; P24503	NP_001004391	NM_001004391
CDH5	cadherin 5, type 2 (vascular endothelium)	374068	F1P1Y9; Q8AYD0	NP_989558	NM_204227
CDH6	cadherin 6, type 2, K-cadherin (fetal kidney)	414842	G1K340; Q90762	NP_001001758	NM_001001758
CDH7	cadherin 7, type 2	374007	F1P1D3; F1P1D4; Q8AWW2; Q90763	NP_989518	NM_204187
CDH8	Cadherin 8, type 2	427553	A6YJX2; A9Y0G9; A9Y0H0; F1NZZ6; Q9YGR8	NP_001093759	NM_001100289
CDH9	cadherin 9, type 2 (T1-cadherin)	428487	E1C264	XP_001231541	XM_001231540
CDHR1	cadherin-related family member 1	414847	F1NKC9; F1P185; Q8UVJ7	NP_001001759	NM_001001759
CDHR2	cadherin-related family member 2	416223	F1NLE0	XP_414546	XM_414546
CDHR3	Cadherin-related family member 3	427846	---	XP_425420	XM_425420
CDHR5	cadherin-related family member 5	770055	E1BRP8	XP_001233370	XM_001233369
[truncated: 11,923 more rows]
