# Supplementary material for: Pathway analysis identifies altered mitochondrial metabolism, neurotransmission, structural pathways and complement cascade in retina/RPE/ choroid in chick model of form-deprivation myopia
Source: PeerJ. 2018 Jun 27;6:e5048. doi: 10.7717/peerj.5048 (PMC6026464; doi:10.7717/peerj.5048)
Supplement: Table S3 — Pearson’s correlation was used to rank and score the genes in the FDMI dataset. Genes at the top or the bottom of the ranked list of genes are highly correlated with duration of short-term occluder wear. [file peerj-06-5048-s004.xlsx]

## Sheet: ranked_gene_list_FDMI
NAME	SCORE
EIF4EBP1	0.885369
DUT	0.849957
NUS1	0.844619
NDUFB6	0.843355
GPC3	0.83848
CYCS	0.816126
BLOC1S5	0.811979
NDUFB3	0.804445
MTFP1	0.802598
NDUFA8	0.800857
CAMK4	0.799012
PCTP	0.796474
EIF6	0.794048
FHIT	0.785947
UQCR11	0.785695
MRPL54	0.785358
TC2N	0.785323
TRIM59	0.784276
EMB	0.782799
GSTA	0.7822
PTN	0.781642
HSCB	0.781373
NME2	0.781054
LOC426279	0.77905
SDAD1	0.775457
SNRPA1	0.774937
NUBP1	0.774032
LYRM1	0.770382
MRPL12	0.768844
LIN52	0.768093
FAM82B	0.76789
PARP4	0.764617
PDZRN3	0.757902
SKP2	0.757125
SPARCL1	0.75573
CDK2AP1	0.754709
AIMP2	0.753608
NVL	0.752551
MYCBP	0.751999
MRPL13	0.751219
KLHDC5	0.750736
SLC30A5	0.747222
MPPED1	0.745231
C4H4ORF44	0.744719
ACSBG2	0.741634
AKR1B10	0.740973
FUT10	0.740901
CNDP2	0.734716
TYMS	0.734584
KLHL15	0.734102
CZH9ORF3	0.732227
UGDH	0.730089
EML4	0.730064
C4ORF17	0.72949
BANP	0.727843
CDK7	0.726844
NDUFAF1	0.726245
METTL7A	0.725823
LOC100857621	0.72357
MYPN	0.723438
GRPEL1	0.722498
TTC32	0.721957
DCXR	0.721732
MTERFD1	0.721728
NDUFC2	0.721091
DNAI1	0.72103
LYPLAL1	0.719202
PDE4D	0.718848
NUDT16L1	0.718229
IFT74	0.717793
LOC768893	0.717078
TOMM6	0.716893
TERF1	0.716167
ATP5F1	0.715094
MRPL24	0.714928
COPS3	0.713921
HIGD2A	0.713875
TRUB1	0.713779
GOT1	0.71373
ACAT1	0.71324
LOC418811	0.71265
C7ORF53	0.712241
LIG3	0.711836
LOC424014	0.711261
NSMCE4A	0.710874
KHDRBS2	0.709682
ATP5E	0.709327
TDH	0.709048
MRPL41	0.707105
NKAIN2	0.705808
ATOH8	0.705711
FCN2	0.70551
MRPL51	0.705075
SYNCRIP	0.705063
RGS18	0.704984
BBS12	0.704868
SSU72	0.704449
EPHA3	0.701561
NDUFB5	0.70123
CCNG1	0.699995
TMEM123	0.699941
RPL22	0.699908
ATP5I	0.699858
SRI	0.698264
LOC395524	0.69797
MRPS22	0.697502
FAM172A	0.696473
EIF2AK1	0.695979
LOC425531	0.695948
RPN1	0.695159
CIB1	0.693912
ZFAT	0.693891
ANAPC13	0.693888
MRPS28	0.693851
C9H21ORF2	0.693734
TST	0.693416
LOC771160	0.693259
LOC100857847	0.692436
LIPT1	0.692198
GLTP	0.69143
SEC61G	0.691404
NUFIP1	0.691082
ADC	0.689499
EFCAB2	0.689376
YIPF5	0.688298
ZBTB46	0.688151
LOC426296	0.688053
ALG2	0.687794
GNG10	0.687724
TUBGCP6	0.687661
MRPS9	0.687091
AKIP1	0.686556
UBE2V2	0.686037
SLMAP	0.685888
GATAD1	0.684956
RCL1	0.684102
SMKR1	0.683856
ST3GAL6	0.683384
CDCA9	0.683139
PRKAG2	0.682598
AKR1B1L	0.682329
SNTN	0.682
RAP1B	0.681721
PCYOX1L	0.680175
PAK1IP1	0.679193
MAVS	0.678533
TRUB2	0.677732
HIST1H46	0.677387
LYSMD3	0.676481
POLR2L	0.675765
GTF3A	0.674492
PPCS	0.674309
LZIC	0.674246
STAMBPL1	0.674014
AKR1D1	0.673664
NME7	0.673637
DFNA5	0.673458
SRD5A3	0.672448
TTC12	0.672438
HIGD1A	0.671957
IDI1	0.671427
COMMD1	0.671336
PPIC	0.671258
ORC3	0.671187
C19H7ORF42	0.670952
C14ORF1	0.670929
SOD2	0.670741
CACNG7	0.670123
DYNLRB2	0.669069
LOC100859378	0.667919
CEP128	0.667842
C1H3ORF38	0.667765
UQCR10	0.667124
DHCR7	0.6659
FAM132A	0.665778
PTGES2	0.665443
FAM175A	0.665036
LOC100857889	0.664231
IL18	0.663954
FAM133B	0.663717
IL20RA	0.662761
BRD7	0.662671
SPEF2	0.662511
ING2	0.662509
RPS27L	0.662131
FAM204A	0.662085
LACE1	0.661641
LOC100858979	0.66111
SAR1B	0.661101
SCRT2	0.659998
LOC100857992	0.659784
CZH5ORF51	0.659757
C20H20ORF85	0.658368
GPX4	0.658179
UTP15	0.657218
ANKRD49	0.656963
LOC100859855	0.65638
SPCS3	0.656318
LOC100858376	0.656011
TCTN2	0.655581
REXO2	0.655455
RBBP7	0.65519
RPL37	0.655128
RPL35A	0.654367
BMF	0.653323
RBP5	0.653167
COQ5	0.653121
IRF8	0.652966
EPHA5	0.651989
RBX1	0.651577
PITHD1	0.651574
TMEM199	0.65098
C1D	0.650935
NOP16	0.650917
DHX29	0.650669
IMMP1L	0.650547
NUP210	0.650437
COX4I1	0.648842
EFCAB1	0.647189
LOC417676	0.647015
LOC100858745	0.646117
DAP3	0.645808
HSP90B1	0.645715
XPOT	0.645195
HEXB	0.644963
CHCHD2	0.644554
RPS17L	0.644394
EVI2B	0.644285
NHP2	0.643667
AZI2	0.643504
CCDC25	0.64267
C28H19orf60	0.642131
CYP2R1	0.642126
PADI2	0.64181
TDRKH	0.641542
TERF2IP	0.640676
IQCB1	0.640574
CEP41	0.640529
RPAIN	0.639799
IMMP2L	0.639482
SNRPC	0.639436
MSL3	0.639316
C4H4ORF41	0.638969
SOCS3	0.638945
CINP	0.63889
RPL32	0.6387
B3GAT2	0.638572
COX6A1	0.638222
RPS25	0.638109
NSDHL	0.637298
MNAT1	0.637219
COX7C	0.636734
C2H8ORF84	0.636589
ATP5S	0.636505
ATG4B	0.636289
GTF3C1	0.6361
RPL24	0.636074
RPS8	0.635505
CCNB2	0.635489
PDGFC	0.635419
GHITM	0.63518
IFT52	0.634615
CAPZA2	0.634239
C6H10ORF90	0.633646
LOC769325	0.633028
ID4	0.632538
PDS5B	0.632158
GNG5	0.632148
PDRG1	0.632058
C3H20ORF94	0.632021
CFDP1	0.631338
CCND2	0.631285
LAMTOR3	0.631109
THYN1	0.631039
NDUFB10	0.63076
VTI1B	0.630757
PPAT	0.630403
TXN	0.629964
LOC100859669	0.629749
RPS16	0.629736
PTGR2	0.629701
PLA2G12B	0.629362
LOC415976	0.629204
NT5C3	0.628954
HAPLN1	0.628787
NDUFB1	0.628698
WDR53	0.628624
ASCC3	0.628605
LDB2	0.627771
CBY1	0.627485
DHFR	0.62746
PRPF38B	0.62588
HSPE1	0.625725
NRIP1	0.625397
PMP2	0.62537
CCDC14	0.625243
IFT46	0.625108
HBXIP	0.625082
RPL23A	0.624913
TPRG1L	0.624901
RPL10A	0.62455
C5H14ORF166	0.624225
SIX6	0.623966
LOC769848	0.623507
CASP8	0.622397
LOC100859753	0.622354
MORN4	0.622345
EFTUD1	0.622335
C11H16ORF57	0.622273
MRPL48	0.622216
LOC415564	0.622039
PPIH	0.62196
HHIPL2	0.621761
C5H15ORF57	0.621748
ESD	0.621292
ZNF639	0.621163
LOC100858449	0.621127
CENPV	0.620976
NDUFV3	0.62084
HSPD1	0.620826
SKIV2L2	0.620632
ZBTB8A	0.620483
2011-03-01	0.620464
CPT2	0.620449
ORC1	0.620413
MTHFD1L	0.62009
NDUFA6	0.619788
MRP63	0.619516
LYRM5	0.619171
PROK2	0.6191
UTP11L	0.618973
RNF185	0.61837
CZH5ORF44	0.618188
MRPL35	0.618183
SUCLG2	0.617262
IDUA	0.616884
LOC770025	0.616673
NTS	0.61651
ATP5J2	0.616296
LPCAT2	0.616131
C10H15ORF44	0.615776
TMEM167B	0.615452
COPB2	0.615357
SELK	0.615297
TRNT1	0.614638
BLMH	0.614612
CALCOCO2	0.614566
LOC100858262	0.614312
SDF2L1	0.614261
2011-09-01	0.614242
MRPL46	0.614183
FAM19A1	0.613752
TIPRL	0.613322
MRPL14	0.613036
INTS3	0.612982
ELAVL4	0.612671
PTRH2	0.612539
C7ORF23	0.612517
DCX	0.612383
LOC422497	0.612176
GDAP2	0.612101
THAP5	0.611942
SELM	0.611357
WDR60	0.610392
PPP4R1	0.610193
ZNHIT6	0.610058
SPTY2D1	0.610013
MPST	0.609615
TBC1D14	0.609252
HMGCS1	0.609106
RPL39	0.60908
LYSMD2	0.608699
ZNHIT3	0.608604
CARS	0.608453
UCK2	0.608442
ARPC3	0.608035
TUBB1	0.608013
CDC5L	0.607935
TCEA1	0.60791
TMED5	0.607602
DUS2L	0.607253
PMM2	0.606917
CCND1	0.606672
SNAPC5	0.606301
CDCA3	0.606267
EXOSC10	0.606016
UFL1	0.605498
CYP20A1	0.605464
N6AMT1	0.605121
TMEM26	0.605043
SSFA2	0.604983
WDR75	0.604912
MRPL23	0.604417
HSPA5	0.604232
LOC425137	0.604124
RAPSN	0.603772
SNHG8	0.603645
PLIN2	0.603609
ATP5H	0.60314
EIF4H	0.603132
TXNDC17	0.603012
RPS26	0.60291
FOXM1	0.602614
GCSH	0.602558
IFNAR1	0.602389
MSMO1	0.602357
SMCHD1	0.602284
DDX55	0.602281
GRAMD3	0.601975
NRBF2	0.601737
MRPL21	0.601662
ZRSR2	0.601645
RPL26L1	0.601289
ELMOD2	0.601187
PDCD2	0.601076
LOC423793	0.601029
HSDL2	0.60102
PHF14	0.600882
GNPDA1	0.600571
N4BP1	0.600369
MYO10	0.600303
ABLIM2	0.60029
SLC1A3	0.600157
IFT88	0.600146
RPS20	0.600088
XRCC2	0.599917
DENR	0.599698
MRPS14	0.599689
C1H22ORF40	0.599444
RWDD1	0.599316
EIF2AK2	0.59897
PEX3	0.598814
RPL27A	0.598755
ATOX1	0.598702
ABCB11	0.598688
MND1	0.598593
C14ORF126	0.598563
SELT	0.598407
FERMT1	0.598314
LOC100859168	0.597999
SMYD4	0.597916
DUSP3	0.597895
RASGRP1	0.597703
WDR77	0.597277
NOS2	0.596798
C20H20ORF111	0.59677
MT4	0.596463
RPL36	0.596104
DDX52	0.595845
PID1	0.595763
NNT	0.59561
CRADD	0.595547
HSD17B2	0.595282
C17ORF80	0.59494
MAK16	0.594832
ZDHHC4	0.594829
SMARCAL1	0.594513
SPICE1	0.594505
FGF18	0.594495
DDRGK1	0.594405
USP46	0.594375
PMS2	0.593846
LYRM4	0.593495
LOC768772	0.593315
GSR	0.592448
BDP1	0.592311
RPL38	0.591961
C2H7ORF63	0.59193
PIGW	0.591773
LOC771974	0.591748
PPARD	0.591502
RPL30	0.591497
PLS1	0.591357
ACTR3	0.591287
RUNDC3B	0.591147
FNDC9	0.590993
RAB22A	0.590986
MRPS18C	0.590947
EXOC3	0.590714
LOC768701	0.590707
AGGF1	0.590601
YRDC	0.590464
DAP	0.590404
NAA20	0.590102
POLR2J	0.590082
ECHS1	0.589717
GSTZ1	0.589013
SGOL1	0.588805
COX7A2	0.588335
TMOD3	0.588263
C2H7ORF36	0.588228
BUD31	0.588207
RPL37A	0.588018
TPH2	0.58796
ABHD17B	0.5876
LRRC3B	0.587488
CHCHD4	0.58735
CAPZA1	0.587278
RRP7A	0.5872
CBR1	0.586881
HPGD	0.586758
EIF2B2	0.586588
CPNE4	0.585877
MTAP	0.585829
PIGB	0.58568
NDUFAF4	0.58522
FAM54A	0.585162
CCDC167	0.585089
METTL2A	0.584668
VLDLR	0.584631
ESCO1	0.584497
LOC100858238	0.584351
HMGCR	0.5841
EIF1AY	0.583945
LOC428515	0.58382
CRTAM	0.583649
LOC422887	0.583612
ABCG8	0.583553
RYR3	0.583516
EAPP	0.583476
KLHL13	0.583366
VPS26A	0.583268
CSE1L	0.58316
ALDH6A1	0.583151
FAM162A	0.582953
METTL6	0.582586
CCDC91	0.58257
OSGEPL1	0.58242
TOMM5	0.582362
MRPL37	0.582263
WDR1	0.582235
C12ORF57	0.582122
DRG1	0.582047
ENKUR	0.581991
AGPAT4	0.58191
CYP46A1	0.581882
NDUFA2	0.581601
NDUFC1	0.581597
C26H6ORF125	0.581514
CCDC79	0.581402
LOC100857982	0.581067
HSBP1	0.580751
TTC4	0.580181
CYB5D2	0.580169
ING1	0.580094
EIF2B1	0.579952
UBA52	0.579859
PPP1R7	0.579812
OSBPL2	0.579621
C2H7ORF41	0.579472
OSBPL9	0.579166
PDCL3	0.57877
CLN8	0.578743
LOC772075	0.578631
ARHGAP10	0.578341
DNAJC24	0.578046
CHCHD3	0.577811
GTF2A2	0.577678
C1H21ORF91	0.577652
PDCD2L	0.57735
RPL13	0.577343
EEF1E1	0.577324
OSTC	0.57705
CAND2	0.576759
DTX2	0.576642
TMEM169	0.576534
WIPF3	0.576416
CZH9ORF102	0.576332
MZT1	0.576302
CALB1	0.576277
ARL13B	0.576164
COBRA1	0.575787
TRIM37	0.575558
NINJ1	0.575555
ECI2	0.575524
GLRX5	0.575518
ARPC4	0.575271
POLR3B	0.575217
KCNK9	0.575159
C7H2ORF69	0.575146
MLH1	0.57505
SNAPC1	0.575045
RABL3	0.57498
C6ORF162	0.574652
OST4	0.574589
THADA	0.574579
REXO4	0.574533
C2H8ORF83	0.574484
IGF2R	0.574387
MLYCD	0.5743
SERHL2	0.574198
BRD9	0.574152
MRPS36	0.574121
ENOX1	0.574076
NDUFS1	0.573962
POP5	0.573342
LOC374195	0.573225
PGGT1B	0.573071
PAM16	0.573028
CCDC58	0.572476
LOC420789	0.572449
LOC421099	0.572413
DYNLT3	0.572375
C22ORF32	0.572289
NIP7	0.572083
LEPROTL1	0.571878
HAUS2	0.57186
TMBIM4	0.571666
RMI1	0.571328
ISCA1	0.571255
RPS27A	0.571024
MYOM3	0.570349
GTPBP6	0.570313
USP25	0.570306
VTCN1	0.570241
SREK1	0.570232
GEMIN2	0.570211
MRPL39	0.570151
FTL	0.570046
DSTN	0.569847
TCP1	0.569741
ABCE1	0.569528
SH2D5	0.569466
AGBL3	0.569247
BCS1L	0.569072
FAM82A1	0.568819
HSPB11	0.568597
LOC100858220	0.568527
MGARP	0.568525
RWDD4	0.568288
KIF11	0.568198
IFIH1	0.568158
GOLGA3	0.568156
DGUOK	0.567953
HEATR2	0.56762
NDUFA1	0.567223
BCHE	0.567123
VPS11	0.56711
FKBP3	0.566841
ERI1	0.566541
DPM2	0.56646
CADPS2	0.566165
PARP11	0.565972
LEO1	0.565852
MTIF3	0.565735
PHF20L1	0.565547
DCAF4	0.565491
ZNF410	0.565201
OTOA	0.565155
STX7	0.5649
SEC61B	0.564823
CACNG4	0.564729
KLHL32	0.564671
PCBD2	0.564535
LYN	0.564512
LOC770371	0.564508
UCHL3	0.564415
KCNMB2	0.563984
SERPINB6	0.563752
FGD3	0.563403
NHEDC2	0.563276
GTF2E2	0.562864
BHMT	0.562371
HSD17B4	0.562371
AMACR	0.562309
PSMD5	0.562272
CHCHD7	0.562097
RRAS2	0.562077
CMYA5	0.562035
AARSD1	0.56177
ATG10	0.561738
IL17D	0.561718
CCDC86	0.561709
DAD1	0.561431
ACAT2	0.561319
MRPL18	0.561165
2015-09-01	0.561039
DPY19L1	0.560898
NUB1	0.560804
PUS7L	0.560358
RPL36A	0.560251
TXLNG	0.560145
USMG5	0.560076
FHDC1	0.55956
RPLP2	0.559321
SDHA	0.559316
TMEM69	0.559253
LPIN2	0.559247
RPL6	0.559167
TFAM	0.558709
PEX10	0.558669
TMEM163	0.558657
LOC425215	0.558657
RPS15A	0.558553
COQ9	0.558459
PLOD2	0.558455
CHD1	0.558365
TIMM13	0.55835
LOC100858798	0.558213
NOG	0.558151
ITGA4	0.558032
LOC100857583	0.557767
DARS	0.557632
PPP2R3A	0.557381
CCZ1	0.557301
BCCIP	0.557284
HAS2	0.556887
LOC426015	0.556607
GTPBP5	0.556467
LOC100857221	0.556065
TAF8	0.555711
TTC27	0.554891
ARL2	0.554748
RNLS	0.554668
C8H1orf53	0.554626
TIMM22	0.554482
RPL19	0.554429
TBP	0.554265
C1H7ORF60	0.554084
LOC420411	0.554069
CDH10	0.553581
TRPC4	0.553519
LOC100858824	0.553492
C1H7orf73	0.553349
NCF4	0.553309
SH3GLB1	0.553244
RBM22	0.552638
RIN3	0.552564
HPRT1	0.552019
PKP2	0.551888
BAG5	0.551816
BAZ1A	0.55175
LOC415966	0.551455
CHN1	0.551346
IDS	0.551265
USP1	0.550911
ZNF622	0.550798
ASF1A	0.550562
PCGF6	0.550494
COG2	0.550258
RPL21	0.550191
THNSL1	0.550185
FAM35A	0.550078
FNTA	0.549984
RPS15	0.549961
GOLT1B	0.549943
GPR34	0.54978
GTPBP4	0.549576
FAM169A	0.549524
CEP95	0.549487
CZH5ORF63	0.549089
RALGPS2	0.548978
RWDD2A	0.548945
B3GNT2	0.54883
RAX2	0.548716
NFAM1	0.548711
LSM5	0.548673
SNX1	0.548645
E2F1	0.548257
PPA2	0.548072
TECR	0.547733
HDHD2	0.547654
PSMC5	0.547164
LOC100859665	0.546973
KCTD4	0.546876
PRMT10	0.546505
HJURP	0.546426
TCEB1	0.54637
ZC3H15	0.546327
LMAN1	0.546041
RIPPLY2	0.545855
HMGN1	0.545788
SLC25A21	0.545734
PPP1R9B	0.545521
SLC7A6	0.545497
DENND2A	0.545305
TMEM18	0.545264
GYG1	0.545036
ROCK1	0.544835
ICT1	0.544817
LMNB1	0.544757
RPLP1	0.544611
RPS29	0.544506
RAN	0.54446
CHAF1B	0.544411
C18H17orf89	0.544238
TXNDC9	0.544182
PMPCA	0.544156
TMEM237	0.543725
LOC395611	0.543661
MOCS2	0.543585
PARP1	0.543198
LOC100857735	0.543058
LOC777223	0.542955
ATXN10	0.542694
SLC48A1	0.542654
LYAR	0.542528
HS1BP3	0.542439
COL11A1	0.542287
STC2	0.542171
BRD1	0.542148
PRMT7	0.542143
LARS2	0.541922
ASNS	0.541905
TBC1D1	0.541902
SNW1	0.541884
FBN1	0.541791
PPID	0.541777
ABCC13	0.541694
KLF3	0.541637
GSTK1	0.541537
SNX14	0.541325
RNASEL	0.54116
IL10RB	0.541059
LOC100859179	0.541051
NAA15	0.54077
MRPL20	0.540462
FRMPD4	0.540284
LOC770379	0.540265
RPF1	0.540133
CGNL1	0.540052
RPSA	0.539943
PIN4	0.539911
NUP37	0.539735
GMNN	0.539652
COQ10B	0.539627
RASSF3	0.539578
NFE2L2	0.539296
RPL7L1	0.539102
ADAT2	0.539038
RPP40	0.53903
CHMP4B	0.538897
C1QTNF7	0.538873
SCPEP1	0.538775
UNC50	0.538605
LOC100858533	0.538425
DSE	0.538365
ACN9	0.538347
ANKRD13B	0.538089
SPRY2	0.537997
OPRM1	0.537922
PEX13	0.537869
SQLE	0.537817
DNAH3	0.537715
MDH1	0.53761
USP42	0.537309
PFDN4	0.537219
ACAD11	0.537216
HMOX2	0.537094
ERC2	0.537008
NDUFB8	0.536959
MED9	0.536855
SWI5	0.536695
TMEM135	0.53668
ASPH	0.536462
C14H8ORF33	0.536403
GRAMD1C	0.536201
METTL20	0.536182
MYL12A	0.536176
SLC4A1AP	0.536109
TBCC	0.536078
CSTB	0.536051
QRSL1	0.535925
LOC100858215	0.535917
UFSP2	0.535879
C8H1ORF123	0.535804
DERA	0.535501
NDUFA4	0.535162
ZFAND2A	0.534935
C3H6ORF203	0.534803
MRPL33	0.534758
TFB2M	0.53474
CSTF1	0.534621
TNFAIP8L1	0.534255
RPL35	0.534117
ARFGAP2	0.534021
GNG4	0.533989
IAH1	0.533886
CEP290	0.533851
ASNSD1	0.533769
ACVR1	0.53337
RFTN1	0.533322
MACC1	0.533061
CNRIP1	0.532822
RPS19BP1	0.532802
CCT8	0.532731
PTS	0.532636
RFX3	0.53201
DNAJC2	0.53192
SGTA	0.531857
PHB2	0.531677
CENPI	0.531634
NUDT14	0.531567
CCDC15	0.531434
MYH13	0.531272
LOC423605	0.531257
NUDT12	0.531213
GLT8D1	0.531105
SIPA1L1	0.530818
CEP57	0.530751
ATPBD4	0.530694
TARS	0.53046
YWHAZ	0.530432
ARHGEF28	0.529969
TMEM120B	0.529851
ATRX	0.529706
NOC2L	0.529641
KIAA1704	0.529615
LOC419662	0.529608
NDUFA5	0.529595
INTS10	0.529558
SLC9A9	0.529302
RIPK1	0.529221
C20H20ORF4	0.529173
TRPV6	0.529013
LRRC47	0.528915
RAB4A	0.528718
ZC3H14	0.528618
PTGR1	0.528605
FKBP7	0.528544
PPP2R3C	0.528412
GFRAL	0.528366
ASAP2	0.527947
SH3YL1	0.527919
LSM4	0.527602
USP33	0.52755
C12H3ORF67	0.527527
ARID4A	0.527465
RAD51	0.527416
AK3	0.527386
DGCR14	0.527276
COL4A1	0.527091
DDX50	0.526789
LRRC6	0.526675
CEP78	0.52659
CPA2	0.526587
ALG10	0.525683
RRM1	0.525628
CD38	0.525154
CYFIP1	0.524976
LOC769908	0.524855
NCAPH	0.52485
AP5Z1	0.524703
COMMD5	0.524658
PLSCR1	0.524586
LOC415708	0.524446
GPR37	0.524375
GPR128	0.524167
AGA	0.524155
APIP	0.523942
NUBPL	0.523796
ZCCHC24	0.523763
PSMC2	0.523622
KIAA1984	0.523488
TUBB6	0.523478
LOC420849	0.523318
ACTR2	0.523004
CASC4	0.522975
HSPB2	0.522961
EPHX1	0.522959
LOC769446	0.522949
MLX	0.52287
ERCC5	0.52265
MLC1	0.522599
SMARCE1	0.522534
CPPED1	0.522523
GPD2	0.522339
MRPS25	0.52213
C2ORF56	0.521626
TRIAP1	0.52157
S100A4	0.521342
EIF3I	0.521092
CETN2	0.520801
CDH13	0.520799
PDPK1	0.520304
MTCH2	0.520233
TIMM44	0.520162
MYLIP	0.520047
APAF1	0.519887
CSNK2A1	0.519795
NR0B1	0.519792
LOC421356	0.519634
NOX3	0.519393
C9ORF23	0.519276
MEX3D	0.519254
RMND1	0.518977
VNN1	0.518959
ACOT13	0.518903
UBXN10	0.518819
TXNDC5	0.518719
RNF168	0.518717
CPQ	0.518345
ZDBF2	0.518042
MAN2B2	0.517989
AQR	0.51791
PDCD5	0.517841
NTAN1	0.517658
C2H6ORF145	0.517544
C12H3ORF19	0.517544
EPHA7	0.5175
LSG1	0.517337
LOC395616	0.517309
PREPL	0.517258
BAMBI	0.517254
STX18	0.517235
USP6NL	0.51721
DBNDD1	0.517185
SMPX	0.517006
UPP1	0.51692
WIPI2	0.516819
HYPK	0.516297
SNX29	0.516165
LOC423134	0.516083
MTFMT	0.516057
VCAN	0.516052
LOC768941	0.515945
LOC416415	0.515851
BTG4	0.515797
TCTN1	0.515792
ERLEC1	0.515636
RBM34	0.515611
LOC419390	0.515548
TREM2	0.515539
DAB2	0.515488
C9ORF93	0.515478
TMEM167A	0.515339
C6H10ORF88	0.515315
DTD1	0.515235
CHRNB4	0.515192
HEATR3	0.51511
MRPS35	0.515047
HPS1	0.514994
FDFT1	0.514857
SULT1B1	0.514291
OCC-1	0.514214
GPBP1	0.514207
SUPT4H1	0.514083
GGA.15634	0.514082
ARL5B	0.514058
MRPS21	0.513863
SUPV3L1	0.5138
HEATR5A	0.51332
LOC100857622	0.513244
SDF2	0.51323
TPPP	0.513172
IMPA1	0.513162
UQCRH	0.513118
COA5	0.513092
STXBP5	0.512933
SLMO1	0.512902
LOC100859149	0.512899
PLAA	0.512791
HOXD8	0.512728
VPS4B	0.512598
CHST14	0.512406
LOC100859426	0.512331
RDH14	0.512272
ATP5O	0.512195
LOC771161	0.512049
GCLM	0.511948
C1H3ORF26	0.511859
ZNF438	0.511828
LOC100859465	0.511813
BLNK	0.511549
KIAA1107	0.511529
TPMT	0.511388
TMEM43	0.511324
DRGX	0.511072
LOC100858955	0.510687
TAF1B	0.510458
ROR1	0.51028
TMEM175	0.510219
POMP	0.50958
DNAL1	0.509509
TXNDC12	0.509161
NDUFA7	0.509044
TMEM41A	0.50895
ACSBG1	0.508823
BRP44L	0.508716
TCTE3	0.508657
NUCB2	0.50861
COQ3	0.508501
RSL1D1	0.50839
CSDE1	0.508225
ACYP2	0.508073
GRAMD4	0.508066
TM2D2	0.507965
RSPH4A	0.50794
CARS2	0.507784
CPE	0.507688
KDM4C	0.507623
CRYBA2	0.507532
OCA2	0.507498
SREK1IP1	0.507444
SPECC1	0.507194
NFU1	0.507171
HDAC2	0.507109
ZCCHC9	0.507079
KBTBD10	0.507073
PMPCB	0.506955
SASS6	0.506811
GPX1	0.506095
NDUFS6	0.506041
COX17	0.505782
OSR2	0.50556
VTA1	0.505474
BTF3L4	0.50533
LOC100858255	0.505323
C1H12ORF23	0.505228
NDUFS4	0.505226
C10H15ORF40	0.505088
ARPC5	0.505048
EIF2S2	0.50493
CHPT1	0.504883
RNF170	0.504795
TRAPPC2L	0.504787
CEBPB	0.504712
MED10	0.504499
FAM154B	0.504432
HIBCH	0.504368
TPR	0.504344
DDX51	0.504293
ENDOG	0.504195
BRAT1	0.504169
PTPMT1	0.504073
NQO2	0.50391
NCOA7	0.503802
BUB3	0.503754
LOC100858381	0.503752
DLD	0.503472
LOC769462	0.503424
PANK3	0.503373
IFT81	0.503293
PPIG	0.502779
C13H5ORF15	0.502734
AP3S2	0.502523
LOC422214	0.502466
ANKMY2	0.50237
RAD54B	0.502
HYI	0.501579
NUF2	0.501438
SUCLG1	0.501378
EGR1	0.501284
KCNK10	0.500899
LOC420050	0.500756
CBWD1	0.500741
SLITRK4	0.50074
LOC416036	0.500511
CLNS1A	0.500466
LOC421390	0.500363
ETV6	0.500282
MINOS1	0.500239
PPAP2A	0.500059
BET1	0.499909
PNO1	0.499715
CRYL1	0.49971
ZSWIM7	0.499391
CCDC51	0.499356
USH1C	0.499187
PSMA6	0.499162
MSRA	0.499106
GRAP2	0.498806
RAD1	0.498768
MRPL2	0.498767
INTS12	0.498497
FMOD	0.498495
KERA	0.498401
LOC100859332	0.498169
YME1L1	0.498151
MRPL55	0.498076
SFRP1	0.497833
THNSL2	0.497747
USP3	0.497721
ATP5D	0.497654
CHD1L	0.497322
SPRED1	0.497245
EIF5B	0.497115
TAGLN3	0.49705
PWP1	0.497003
LOC769409	0.496864
WDSUB1	0.496617
ADCK2	0.496597
C11H16ORF87	0.496522
CSTF3	0.496457
OAT	0.496356
RPS6KA6	0.496234
FAM165B	0.496175
PSAT1	0.496024
UBE2CBP	0.495852
TAF4	0.495504
SIKE1	0.495248
STMN2	0.495219
C17H9ORF16	0.494981
PSMB3	0.494729
SLC25A4	0.494338
OPA1	0.494297
EIF2A	0.493974
ASCC1	0.493826
PPP1R8	0.493332
CR1L	0.493212
TBC1D7	0.492841
PMS1	0.492725
C2H8ORF38	0.4925
RNASET2	0.492465
INTS7	0.492462
FDXR	0.492272
TMEM184C	0.492155
ARCN1	0.492143
FGD5	0.491958
ALKBH1	0.491908
COMMD4	0.491791
LOC100859114	0.491695
UBA2	0.491692
CITED4	0.491666
AKAP6	0.491644
NAIF1	0.491533
PKDREJ	0.491432
SOCS6	0.491272
LOC100857321	0.491148
LOC419741	0.491139
UHRF1	0.490891
OSMR	0.490552
MDM2	0.490453
SNX5	0.49044
CHST6	0.490361
NBN	0.490122
CRBN	0.490034
LOC769701	0.489899
ADK	0.489806
RARB	0.48979
SEC22A	0.489782
TBC1D9B	0.489584
TTC13	0.489357
ZCCHC6	0.489213
LOC420043	0.489207
RBM43	0.489198
DPYD	0.489093
AQP11	0.488999
RHOQ	0.488697
RPS3	0.488667
SMYD2	0.48865
GARNL3	0.488512
METAP1	0.488325
TRAPPC12	0.488304
RASD2	0.488139
MAPRE1	0.488068
OR10A4	0.488006
LOC100857577	0.487762
TYW5	0.487751
LBFABP	0.487476
DEAF1	0.487354
ALG8	0.487218
KIAA1715	0.487122
DDX49	0.487031
PADI3	0.487025
INSIG2	0.486825
PSMG3	0.486787
POLR2F	0.486595
FKBP1A	0.48626
NAF1	0.486204
ERP29	0.486013
CRYZL1	0.485892
OPN3	0.485877
ALAS1	0.485819
MED6	0.485745
P4HB	0.485726
ATP5C1	0.485666
ORC2	0.485531
OTUD3	0.485525
C1H2ORF49	0.485503
NDUFB9	0.485131
KRT222	0.485022
MMP24	0.484623
KIF25	0.484543
RILPL1	0.484407
EXOSC8	0.484274
AKAP7	0.484265
FASTKD2	0.484229
DGCR6	0.484216
HDAC10	0.484179
RAD23B	0.483953
USP24	0.483943
ADAMTS19	0.483753
FAM69A	0.483672
ACTR3B	0.483639
SDCCAG8	0.483428
PRKRIR	0.483339
ARMC2	0.483305
GALNT11	0.482974
SOCS1	0.482946
LINS	0.482694
SMARCA5	0.482679
LCP1	0.482559
COMMD2	0.482506
BBOX1	0.482155
NDRG1	0.482097
LOC100859645	0.481846
TMPO	0.481734
C5H14ORF118	0.481671
HSP90AA1	0.481623
POLA1	0.481473
OTOP1	0.481379
TBCA	0.481303
MFSD10	0.481247
MRPL27	0.481212
DCP1B	0.48111
CACNA1D	0.481013
C1H13ORF15	0.480857
PLA2G15	0.480629
MYH9	0.48056
CNOT2	0.480482
LOC420562	0.480339
MIF4GD	0.480223
ORC4	0.480082
C1H12ORF66	0.480074
NR13	0.4799
PHF6	0.479868
LOC395325	0.479665
TATDN3	0.47962
TMEM59	0.479558
ALDH18A1	0.479319
FSHR	0.479183
BLZF1	0.478779
ZNF488	0.478661
NUP205	0.478656
FRY	0.478631
PSMB1	0.478628
TOMM7	0.478612
LOC100857418	0.478574
PDGFRL	0.478573
HYALP1	0.478537
C2H18ORF19	0.478349
SEPP1	0.478343
KIRREL	0.478191
SAMM50	0.477999
ACP1	0.477954
DLC1	0.477879
LYRM7	0.477835
FAM59B	0.477763
TAF13	0.477664
PTPN11	0.477268
FBXL17	0.477211
MRPL40	0.477175
DBNDD2	0.477093
RFC1	0.477072
PRSS23	0.476848
DBI	0.476807
RABL5	0.476719
RPS14	0.47667
TM9SF2	0.476623
KIAA1191	0.476596
NEIL1	0.476527
AKAP17A	0.476453
NEK1	0.476377
FAM46D	0.476002
EMC3	0.475848
MXRA7	0.475847
DPP8	0.475772
C17H9ORF78	0.475661
MTHFD1	0.47562
CPNE8	0.475558
LOC420552	0.475471
CIB2	0.475426
DUSP11	0.475229
TMSB4X	0.475176
C17H9ORF96	0.475054
UCHL5	0.474942
NETO2	0.474889
C8H1ORF52	0.474613
C3H1ORF31	0.474557
ADI1	0.474531
TMF1	0.474455
SYAP1	0.474132
C20H20ORF24	0.473878
RPF2	0.473862
C15H12ORF65	0.473589
SPG21	0.473443
PBDC1	0.473383
RERG	0.473263
MRPL50	0.473184
GLTPD1	0.473139
SNX27	0.473064
ACOX1	0.472845
MCEE	0.472795
NDUFS8	0.472674
BTBD1	0.472598
BCAP29	0.472572
NMT2	0.47257
UBQLN1	0.472565
POLD3	0.472535
SHFM1	0.472376
NANP	0.472341
FOLH1	0.472302
SPATA17	0.472234
BCL10	0.472178
AGMO	0.47207
AGTPBP1	0.471953
HDAC8	0.471891
NUP107	0.47154
HEMK1	0.471411
METTL11A	0.471327
SPCS2	0.471167
LOC100859590	0.471026
SMS	0.47102
TDP1	0.470934
gga-mir-6693	0.470728
LOC430735	0.470493
ATIC	0.470371
C5H15ORF29	0.470364
NUDT21	0.470344
GCLC	0.470265
ANLN	0.470234
TNFAIP8	0.470216
RPS28	0.470212
STRAP	0.47021
GORASP2	0.470102
INSIG1	0.470041
WRB	0.46998
KIAA0391	0.469945
MOSPD1	0.469918
KIAA0020	0.469915
E2F6	0.469893
ACTR10	0.469874
PPIF	0.469824
LOC100858006	0.469776
MRTO4	0.469583
NPM1	0.469562
ARMC7	0.469337
CKAP4	0.468997
LOC416933	0.468924
EPS15	0.468901
TIPIN	0.468755
FUT8	0.468671
C5ORF13	0.468622
KIAA1609	0.46859
PIK3C3	0.468175
SLC25A46	0.468165
PAFAH1B2	0.468054
FTSJD2	0.468052
FAM136A	0.467919
C7H2ORF76	0.467882
NUTF2	0.467453
POLR3A	0.46732
ANKS6	0.467135
LOC421792	0.467008
GIN1	0.46671
SLTM	0.466683
IFT20	0.466609
CRLF3	0.4663
SERF1A	0.466204
FAM107A	0.466173
CTTNBP2	0.465604
PACRGL	0.465593
HEBP1	0.465392
PSMA1	0.465251
RIOK2	0.46521
C1ORF198	0.465189
CIP1	0.465038
GGPS1	0.46497
PDE12	0.464715
AHRR	0.464593
LOC100859497	0.464428
HRAS	0.464358
LOC100859874	0.464257
PTPDC1	0.464183
COLEC12	0.463768
C2H7ORF64	0.463742
SGK196	0.463623
MED31	0.463312
CWC27	0.463077
PVRL3	0.463044
CDH11	0.463016
SMAD9	0.462871
SNX7	0.46268
MYO7B	0.462679
C6ORF115	0.462641
CCDC75	0.462593
EPHA6	0.462477
POLE2	0.462469
LOC425742	0.462435
LOC418700	0.462204
AP1AR	0.462201
TJP2	0.462132
PARP9	0.462082
MGST1	0.461968
GPR162	0.46189
USP8	0.461856
KDELC2	0.461806
C2H8ORF76	0.461789
DEPDC7	0.461786
VIPR2	0.461716
PINX1	0.461595
NTN4	0.461498
ZNF385D	0.461404
SLC35F4	0.461306
RMI2	0.46128
TBCD	0.4612
RNF13	0.461142
NDUFS3	0.461041
RAB8B	0.460983
ZBTB2	0.460682
GHR	0.460638
CMC1	0.460604
TPRKB	0.460587
MRPL3	0.46028
ERGIC1	0.460269
INPP5B	0.460221
C16ORF45	0.459776
EIF2S1	0.459666
TMEM70	0.459602
RAB12	0.459581
LOC769676	0.459569
GNMT	0.45941
NEK3	0.459361
AHSA1	0.459337
BRMS1L	0.459092
BVES	0.459041
RPL8	0.458993
FUCA1	0.458873
BAIAP2L1	0.458869
COMMD10	0.458796
MRPS10	0.458762
WDR34	0.458677
UPF3B	0.45856
SOX3	0.458551
DST	0.458541
CHST8	0.458515
MRPS11	0.458308
RILPL2	0.458207
CD109	0.457959
FAM5C	0.457918
SERPINB2	0.457905
EPRS	0.4577
ATP6V1G1	0.457638
NOP14	0.457461
LOC100858661	0.457348
CAT	0.457303
RRP1B	0.457284
C18ORF32	0.457186
ANKRD40	0.45717
LOC420860	0.457157
DPY30	0.457118
EIF4E2	0.456977
WDR48	0.456968
FLNB	0.456956
PEX2	0.456203
RPS10	0.456199
METTL21A	0.45619
ARHGAP23	0.456124
LOC415800	0.456001
DNAJC18	0.455771
DHRS7B	0.455384
TESC	0.45525
NTN1	0.455229
NDUFS7	0.455131
PRKDC	0.45502
GBAS	0.454871
DAZL	0.454869
MEIG1	0.454783
RANBP3	0.454755
PGD	0.454521
DNAJC8	0.454488
C27H17ORF105	0.454406
LOC424111	0.454371
C18ORF55	0.454082
GRHPR	0.454001
MCM4	0.453935
GEMIN5	0.453913
C7H2ORF77	0.453901
NCBP1	0.453878
COPS8	0.453873
LOC416090	0.453797
CCNH	0.453755
NTPCR	0.453674
TMEM41B	0.453646
CTDP1	0.453626
RPS4X	0.4536
TWISTNB	0.453282
SLC35F2	0.453274
MYBPC3	0.453036
UBA6	0.45276
NT5DC1	0.452343
C11H16ORF80	0.452314
RPL29	0.452271
POGLUT1	0.452018
UBXN4	0.451919
TBL1X	0.451742
CCKAR	0.451617
C4H4ORF32	0.451464
VSTM4	0.451297
RFC3	0.451295
NPR3	0.451085
MMP27	0.450859
RAB36	0.450738
MXRA8	0.450466
TMCO6	0.450367
GXYLT1	0.450339
PTCD1	0.450241
CCDC39	0.450192
XPA	0.450142
SGK2	0.450121
CD164	0.449892
BMS1	0.449814
PDE3B	0.449709
PTTG1	0.449601
ST8SIA3	0.449591
RB1	0.449567
PTRF	0.449463
TMEM38B	0.449221
CTNNB1	0.44902
LCA5L	0.448992
TMEM185A	0.448973
LOC421978	0.448971
WDR36	0.448918
SH2D4B	0.44882
NKRF	0.448791
RNF2	0.448471
PVALB	0.448414
IL17RD	0.448292
MRPS2	0.448284
RNF114	0.448271
MFAP3	0.44826
TOE1	0.448242
LOC770392	0.448154
GALR3	0.448137
UTP20	0.447893
CASP3	0.44786
NOC3L	0.447851
LOC422757	0.447827
H2AFY	0.447753
TMEM14A	0.447597
CASP8AP2	0.447522
KIAA1009	0.44749
LMNA	0.447482
ZNF644	0.447396
NOVA1	0.447277
C2H7ORF30	0.447125
FCER1G	0.446881
LRPAP1	0.446857
ST6GALNAC4	0.446853
CNTN5	0.446783
ABCC9	0.446738
LOC100857643	0.446525
LOC425756	0.446378
RRAGD	0.446095
RWDD3	0.446081
GOLM1	0.445976
LOC100857566	0.445896
PARL	0.445798
RIOK1	0.44565
IQCE	0.445422
ANAPC5	0.445256
N4BP2	0.445224
ALG1	0.444881
AGPAT9	0.444844
MANBA	0.444815
LGALSL	0.444745
TPP2	0.444613
MRPS33	0.444391
ZPBP	0.444357
KCNA4	0.444329
SLC15A4	0.444137
CEP63	0.444121
FSD1L	0.443902
ZNF536	0.44388
MAD1L1	0.443874
TMEM60	0.443653
VPS25	0.44359
EIF3D	0.443324
TMEM177	0.443182
GNPNAT1	0.443054
YAF2	0.443005
LOC768416	0.442677
LOC418666	0.44261
RNF20	0.442566
LOC396120	0.442493
LPAR1	0.442463
CCDC132	0.442298
SCFD1	0.442231
C1H21ORF59	0.442107
NEK4	0.4419
ST6GAL1	0.441846
ICA1	0.441702
TNFRSF18	0.441698
TTLL5	0.441677
ZFAND4	0.44139
TBPL1	0.441315
DRG2	0.441166
RPS23	0.441147
CNEP1R1	0.44112
ENY2	0.441094
DUSP22	0.440901
CD5	0.440899
RNF128	0.440889
WDR61	0.440886
LOC772111	0.44082
KLF6	0.440729
COL22A1	0.440655
RANBP1	0.440592
POLR2D	0.440418
ALDH9A1	0.440397
DYX1C1	0.43997
HAUS6	0.439917
CNIH4	0.439888
TMEM129	0.439789
APOO	0.439684
DPCD	0.439634
GPR155	0.439607
CCT5	0.439563
MXD4	0.439374
RAB20	0.439324
KCNMB1	0.439299
MMP10	0.439092
PIGP	0.439082
GSTT1L	0.438809
LOC422426	0.438558
SNRNP48	0.438488
KCTD12	0.438299
LOC100858335	0.438251
ACYP1	0.43813
FASLG	0.43802
LOC420807	0.437784
LOC100859651	0.437624
NAA40	0.437325
TOR1A	0.437226
TRMT6	0.437103
RABEP1	0.436815
MKX	0.436734
PIGZ	0.436722
RCN2	0.436666
XBP1	0.43636
EIF3H	0.436308
PTGS2	0.436255
LETM1	0.436181
TMTC3	0.435924
LOXL3	0.435763
LOC423731	0.435716
FAM122A	0.435587
RPAP3	0.435396
GUSB	0.435319
MT3	0.435238
PPP1R21	0.435126
AGPHD1	0.435062
LOC418472	0.434963
NTF3	0.434885
LOC100859714	0.434723
OXSM	0.434694
LOC429115	0.434486
TTC34	0.434435
PDIA4	0.434295
MCMBP	0.434156
EFCAB3	0.434089
LOC100858441	0.434084
SLC35F1	0.433839
PDS5A	0.433797
HIST1H101	0.43357
ARF5	0.433517
DUSP6	0.433508
LOC100859853	0.433391
NNF1	0.433302
BRWD1	0.43316
IARS2	0.433078
GALK2	0.432894
LRRC31	0.432817
USP40	0.432813
SOST	0.432809
TMEM50B	0.43279
IFT43	0.432748
DCP2	0.432664
RPS3A	0.432518
CHAC2	0.432474
HINTW	0.432473
RABIF	0.432434
SPATS2L	0.432347
LRRC58	0.432307
LOC100858339	0.432194
RPL7	0.432181
PION	0.432164
SMU1	0.432113
CHPF2	0.432045
PASK	0.43201
MRPS31	0.43192
FAT1	0.431738
GPR22	0.431577
EXOSC7	0.431561
NEK11	0.431517
NARS	0.431334
IPMK	0.431281
GJB1	0.431098
COX8A	0.430904
ZNF706	0.430835
CERS6	0.430692
COX6C	0.430658
TIMM9	0.430594
PROSC	0.430255
TEKT5	0.430231
ATL1	0.430041
INPP4B	0.43004
SLC35G1	0.429827
ANKRD26	0.42971
DSCR3	0.429518
C18H17ORF67	0.429481
TGDS	0.429357
CNTN1	0.429257
ODC1	0.429084
SH3BGRL3	0.428957
ADMP	0.428835
LRRFIP2	0.428776
SETBP1	0.428694
LOC427161	0.428491
IARS	0.428402
LECT2	0.428379
SLU7	0.428376
FOXP2	0.428345
GNB2L1	0.428278
EIF3J	0.428143
ACAA2	0.428009
CTR9	0.427907
RORA	0.42784
PDCD4	0.427466
IREB2	0.427466
MSH2	0.427375
SKA2	0.427227
RBM7	0.427214
H2AFZ	0.427003
DDX1	0.426981
OPN4-1	0.42692
C20H20ORF11	0.426855
CCNI2	0.426748
PDGFRA	0.426738
C6ORF192	0.426597
TMED7	0.426504
SLC9A8	0.426496
SRRM2	0.426456
RARRES2	0.426284
GATA5	0.426176
PPT1	0.426137
LOC769866	0.426086
NPEPL1	0.426023
LOC100859769	0.426001
DDX46	0.425827
SRGN	0.425807
LOC100859852	0.425618
CHKA	0.425372
COX11	0.425353
SMC3	0.425352
MYH1D	0.425274
INVS	0.425269
MLLT3	0.425149
TSG101	0.425149
WDR89	0.425113
SMAD2	0.425093
ARHGAP25	0.424948
LMO4	0.424929
LOC431656	0.424897
TSPAN12	0.424853
CHORDC1	0.424842
KLHL7	0.42465
CCL20	0.424591
LRRCC1	0.424562
PEF1	0.424558
SRCIN1	0.424552
DNAJC21	0.424525
MLH3	0.424461
CD274	0.42443
LOC396531	0.424409
SPP1	0.424041
CWC15	0.423971
MED14	0.423841
LOC770284	0.423807
C4H8ORF40	0.423799
HACE1	0.423507
NDUFAF2	0.42345
NRG4	0.423402
CH25H	0.423132
CD36	0.423107
RFC4	0.423069
BZW2	0.423025
TMEM47	0.422877
RPS7	0.422711
THAP4	0.422674
RAB11A	0.422641
NOA1	0.422577
PPDPF	0.42241
B4GALT6	0.422262
DDX47	0.422153
GART	0.421969
STK17B	0.421953
CREM	0.421909
C20ORF20	0.421844
MAFG	0.421841
TMEM192	0.421748
PPP2R2D	0.421735
TMEFF2	0.421715
C17ORF78	0.421714
EMC6	0.421651
MYH7B	0.421475
LONP1	0.421474
RGN	0.421464
LOC100858362	0.421349
COPG2	0.421303
WFDC1	0.421217
MTPAP	0.421202
NFIL3	0.421152
LOC100857711	0.421093
HINT3	0.420997
EIF2S3	0.420953
RAB3GAP2	0.420661
LYST	0.420512
HYOU1	0.420502
LRRC57	0.420236
ASB14	0.420183
XPO4	0.420084
GTF3C5	0.419956
FAM114A2	0.419895
PTCD3	0.419774
PRKAB1	0.419694
SUMF2	0.41964
SBK2	0.419634
RFX4	0.419522
TTC37	0.419248
ALAD	0.419146
PPP1R3A	0.418929
BTBD10	0.41888
LOC100857673	0.418807
ZCCHC11	0.418785
ASIC5	0.4187
RPL14	0.418666
FBXO22	0.418541
FAM49B	0.418485
MRPL17	0.418452
SRFBP1	0.418417
C25H1ORF43	0.418415
TSPAN15	0.418399
C4H4ORF43	0.418369
SYS1	0.418136
THG1L	0.417851
FABP3	0.417847
LLPH	0.417788
S100A10	0.417678
BLOC1S2	0.4176
ATPAF2	0.417566
INHBA	0.417555
KLHL14	0.417413
TMX2	0.417335
CYP2B7P1	0.417313
CTSO	0.417288
MTDH	0.417112
SAAL1	0.417103
DYM	0.417056
PGM3	0.417039
SNN	0.416993
KLHL8	0.416982
TYK2	0.416951
CYP1A1	0.416871
ARL9	0.416845
LOC417536	0.416805
JAKMIP1	0.416704
SLC6A5	0.416485
SNX3	0.416483
PLA2G4A	0.416332
C2H7ORF25	0.416258
RAB33B	0.416218
RBFA	0.416172
IGSF6	0.416073
PPA1	0.416001
COL14A1	0.415928
RPL22L1	0.41583
PKNOX1	0.415769
PTPN5	0.415714
NSMCE2	0.415669
KIF13A	0.415604
KIAA1524	0.415583
GNG13	0.415415
KCNS3	0.415412
DUSP23	0.415384
SNX6	0.415215
LOC418927	0.415112
WFS1	0.415065
PPHLN1	0.414898
THRSP	0.414838
PALD1	0.414663
RPS6	0.414461
EDARADD	0.414336
NOL10	0.414315
PEX11A	0.414234
ADAMTS6	0.414082
LOC770450	0.414037
COMMD7	0.413965
EDEM2	0.413751
LOC395379	0.413679
MAP9	0.413583
FBXO25	0.413387
UBL3	0.413268
AIM1L	0.413265
ISM1	0.413189
CROT	0.413051
FAM164C	0.412953
UBXN2A	0.412948
[truncated: 12,322 more rows]
